# Supplementary material for: Catalytic reduction of aryl trialkylammonium salts to aryl silanes and arenes
Source: Royal Society of Chemistry journal article supplement (doi:10.1039/c9sc01083a), 2019-01-01
Supplement: c9sc01083a1.pdf [file c9sc01083a1.pdf]

Supporting Information

Nickel-Catalyzed Ligand Controlled Silylation and Reduction of Aryl Ammonium Salts

*Alexander W. Rand and John Montgomery\**

Department of Chemistry, University of Michigan, Ann Arbor, MI 48109-1055

[jmontg@umich.edu](mailto:jmontg@umich.edu)

**Table of Contents**

|       |                              |      |
|-------|------------------------------|------|
| I)    | General Experimental Details | S2   |
| II)   | General Procedures           | S3   |
| III)  | Starting Material Synthesis  | S6   |
| IV)   | Supplementary Tables         | S15  |
| V)    | Calibration Curves           | S18  |
| VI)   | Silylation Substrates        | S26  |
| VII)  | Reduction Substrates         | S45  |
| VIII) | Synthetic Demonstrations     | S50  |
| IX)   | Large Scale Silylation       | S58  |
| X)    | NMR Spectra                  | S59  |
| XI)   | References                   | S106 |

## I) General Experimental Details

All reagents were used as received unless otherwise noted. Solvents were purified under nitrogen using a solvent purification system (Innovative Technology, Inc. Model # SPS400-3 and PS-400-3).  $\text{Et}_3\text{SiH}$  (Sigma-Aldrich),  $\text{BnMe}_2\text{SiH}$  (Sigma-Aldrich),  $\text{PhMe}_2\text{SiH}$  (Sigma-Aldrich), and  $(\text{TMSO})\text{MeSiH}$  (TCI Chemicals) were passed through basic alumina and distilled before use and stored under nitrogen.  $\text{IPr}^*\text{OMe}$  (made from known procedure<sup>[1]</sup>),  $\text{IMes}\cdot\text{HCl}$  (made from known procedure<sup>[2]</sup>), other N-heterocyclic carbenes (Sigma-Aldrich), and  $\text{NaO}\cdot\text{t-Bu}$  (Strem Chemicals) were stored and weighed in an inert atmosphere glovebox.

Analytical thin layer chromatography (TLC) was performed on Kieselgel 60 F254 (250  $\mu\text{m}$  silica gel) glass plates and compounds were visualized with UV light and p-anisaldehyde, potassium permanganate or ceric ammonium molybdate stains. Flash column chromatography was performed using Kieselgel 60 (230-400 mesh) silica gel. Eluent mixtures are reported as v:v percentages of the minor constituent in the major constituent. All compounds purified by column chromatography were sufficiently pure for use in further experiments unless otherwise indicated.  $^1\text{H}$  NMR spectra were collected at 400 MHz on a Varian MR400, at 500 MHz on a Varian Inova 500 or Varian vnmrs 500, or at 700 MHz on a Varian vnmrs 700 instrument. The proton signal of the residual, nondeuterated solvent ( $\delta$  7.26 for  $\text{CHCl}_3$ ) was used as the internal reference for  $^1\text{H}$  NMR spectra.  $^{13}\text{C}$  NMR spectra were completely heterodecoupled and measured at 125 MHz or 175 MHz. Chloroform- $d$  ( $\delta$  77.00) was used as an internal reference. High resolution mass spectra were recorded on a VG 70-250-s spectrometer manufactured by Micromass Corp. (Manchester UK) at the University of Michigan Mass Spectrometry Laboratory. GCMS analysis was carried out on a HP 6980 Series GC system with HP-5MS column (30 m x 0.250 mm x 0.25  $\mu\text{m}$ ). GC/FID analysis was carried out on a HP 6980N Series GC system with a HP-5 column (30 m x 0.32 mm x 0.25  $\mu\text{m}$ ).

## II) General Procedures

### General procedure for nickel-catalyzed silylation of aryl ammonium salts:

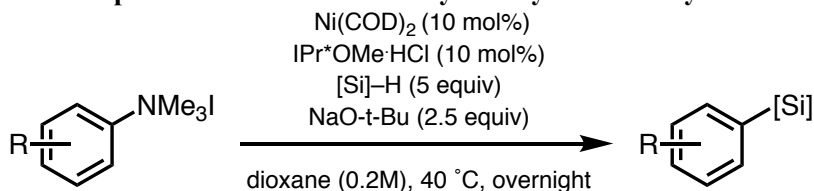

To an oven-dried 8 mL vial equipped with a Teflon-coated magnetic stir bar was added  $\text{Ni(COD)}_2$  (2.8 mg, 0.01 mmol, 0.1 equiv), *N,N'*-Bis(2,6-bis(diphenylmethyl)-4-methoxyphenyl)imidazolium chloride ( $\text{IPr}^*\text{OMe-HCl}$ ) (9.8 mg, 0.01 mmol, 0.1 equiv),  $\text{NaO-}t\text{-Bu}$  (24 mg, 0.25 mmol, 2.5 equiv), and ammonium salt (0.1 mmol, 1 equiv) were combined under inert atmosphere and suspended in 0.5 mL of dioxane at rt. Silane (0.5 mmol, 5 equiv) was added and the vial was sealed with a Teflon cap before removing from the glovebox to heat to 40 °C overnight. Upon completion, the reaction mixture was quenched with 1 mL EtOAc and run through a silica gel plug with 5 mL EtOAc. The solvent was removed by rotary evaporation and the crude reaction mixture was purified by silica gel chromatography.

### Modified general procedure using air-tolerant nickel(0) catalyst:

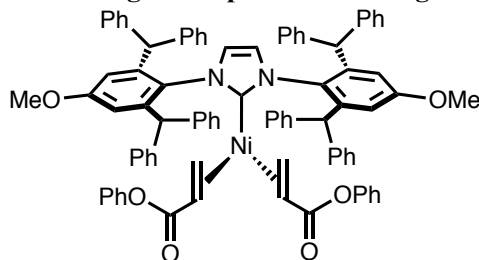

#### $\text{Ni(IPr}^*\text{OMe)(phenyl acrylate)}_2$

To an oven-dried 8 mL vial equipped with a Teflon-coated magnetic stir bar was added (1,3-Bis(2,6-bis(diphenylmethyl)-4-methoxyphenyl)imidazol-2-ylidene)bis(phenyl acrylate)nickel(0) ( $\text{Ni(IPr}^*\text{OMe)(phenyl acrylate)}_2$ ) (26 mg, 0.01 mmol, 0.1 equiv),  $\text{NaO-}t\text{-Bu}$  (48 mg, 0.50 mmol, 2.5 equiv), and ammonium salt **2a** (68mg, 0.2 mmol, 1 equiv) were combined under inert atmosphere and suspended in 1.0 mL of dioxane at rt. Triethylsilane (156 $\mu\text{L}$ , 1.0 mmol, 5 equiv) was added and the vial was sealed with a Teflon cap before removing from the glovebox to heat to 40 °C overnight. Upon completion, the reaction mixture was quenched with 1 mL EtOAc and run through a silica gel plug with 5 mL EtOAc. Analysis of the crude reaction mixture by GC/FID using tridecane as an internal standard showed 76% yield of aryl silane **2a** and 13% yield of **3a**. The solvent was removed by rotary evaporation and the crude reaction mixture was purified by flash chromatography (100% hexanes) to give **2a** as a colorless oil in 67% yield (35.9 mg, 0.134 mmol).

### General procedure for nickel-catalyzed reduction of aryl ammonium salts:

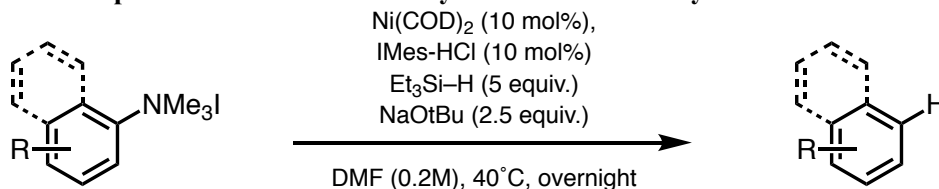

To an oven-dried 8 mL vial equipped with a Teflon-coated magnetic stir bar was added Ni(COD)<sub>2</sub> (2.8 mg, 0.01 mmol, 0.1 equiv), 1,3-Bis(2,4,6-trimethylphenyl)imidazolium chloride (IMes·HCl) (3.4 mg, 0.01 mmol, 0.1 equiv), NaO-*t*-Bu (24 mg, 0.25 mmol, 2.5 equiv), and ammonium salt (0.1 mmol, 1 equiv) were combined under inert atmosphere and dissolved in 0.5 mL of DMF at rt. Triethylsilane (80  $\mu$ L, 0.5 mmol, 5 equiv) was added and the vial was sealed with a Teflon cap before removing from the glovebox to heat to 40 °C overnight. Upon completion, the reaction mixture was quenched with 1 mL EtOAc and run through a silica gel plug with 5 mL EtOAc. The solvent was removed by rotary evaporation and the crude reaction mixture was purified by silica gel chromatography.

**General procedures for reductive amination:**

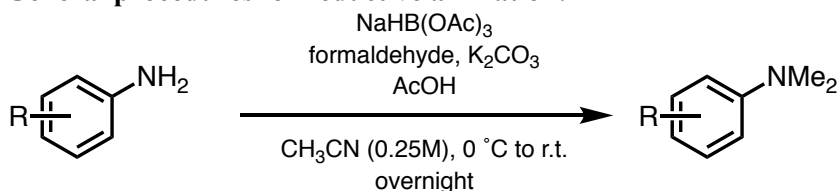

To an appropriately sized round-bottom flask equipped with a Teflon-coated magnetic stir bar under a nitrogen atmosphere were added aniline (1 equiv) and CH<sub>3</sub>CN (0.25M). The flask was cooled to 0 °C before adding formaldehyde solution (37%) (6 equiv) and K<sub>2</sub>CO<sub>3</sub> (2 equiv). After 1 hour of stirring NaHB(OAc)<sub>3</sub> (3 equiv) was added followed by the slow addition of AcOH (11 equiv). The solution was warmed to room temperature after 30 min and stirred overnight. The reaction was quenched with H<sub>2</sub>O and EtOAc. The solution was basified with sat. NaHCO<sub>3</sub> and extracted with 3x EtOAc. The organics were dried over brine, then Na<sub>2</sub>SO<sub>4</sub> and concentrated before purifying by silica gel column chromatography.

**General procedures for Suzuki-Miura coupling:**

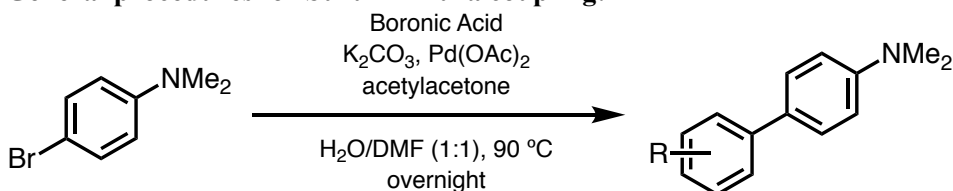

To an appropriately sized round-bottom flask equipped with a Teflon-coated magnetic stir bar and a reflux condenser was added 4-bromo-dimethylaniline (1.00 equiv), arylboronic acid (1.50 equiv), K<sub>2</sub>CO<sub>3</sub> (2.00 equiv), Pd(OAc)<sub>2</sub> (0.01 equiv), and acetylacetone (0.02 equiv). The flask was backfilled with N<sub>2</sub> three times before adding H<sub>2</sub>O (0.66M) and DMF (0.66M). The reaction was heated to 90 °C overnight. The reaction was cooled and quenched with Et<sub>2</sub>O and the organics were washed 1x H<sub>2</sub>O, 2x brine. The organics were then dried over MgSO<sub>4</sub> and concentrated before purifying by silica gel column chromatography.<sup>[3]</sup>

**General procedures for ammonium salt formation:**

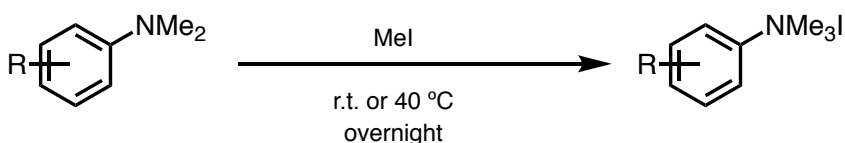

To an appropriately sized vial equipped with a Teflon-coated magnetic stir bar and a reflux

condenser was added *N,N*-dimethylaniline (1.00 equiv) and MeI (10.00 equiv). The vial was sealed and stirred until a white precipitate formed. Electron deficient aniline typically required heating to 40 °C overnight while electron rich anilines reached full conversion in a few hours. The solid was then filtered washed copiously with Et<sub>2</sub>O and rigorously dried on high vac for several hours. The trimethylammonium salts were used as is in subsequent chemistry.<sup>[4]</sup>

### III) Starting Material Synthesis

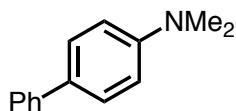

**2**

#### *N,N*-dimethyl-[1,1'-biphenyl]-4-amine (**2**)

The general procedure for Suzuki-Miura coupling was followed using 4-bromo-dimethylaniline (1.00 g, 5.00 mmol, 1.00 equiv), phenylboronic acid (914 mg, 7.5 mmol, 1.50 equiv), K<sub>2</sub>CO<sub>3</sub> (1.38 g, 10.00 mmol, 2.00 equiv), Pd(OAc)<sub>2</sub> (11 mg, 0.05 mmol, 0.01 equiv), acetylacetone (10 mg, 0.10 mmol, 0.02 equiv), H<sub>2</sub>O (7.5 mL), and DMF (7.5 mL). Purification by flash chromatography (90:10 hexanes/EtOAc) gave the title compound as a white solid in 87% yield (690 mg, 3.49 mmol). The spectral data matches that previously reported in the literature.<sup>[3]</sup>

**<sup>1</sup>H NMR** (401 MHz, Chloroform-*d*)  $\delta$  7.61 – 7.53 (m, 2H), 7.51 (d, *J* = 8.8 Hz, 2H), 7.39 (t, *J* = 7.6 Hz, 2H), 7.26 (m, 1H), 6.81 (d, *J* = 8.8 Hz, 2H), 3.00 (s, 6H).

**<sup>13</sup>C NMR** (126 MHz, Chloroform-*d*)  $\delta$  150.11, 141.36, 129.38, 128.77, 127.83, 126.42, 126.11, 112.90, 40.71.

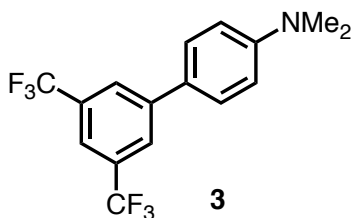

**3**

#### *N,N*-dimethyl-3',5'-bis(trifluoromethyl)-[1,1'-biphenyl]-4-amine

To an oven-dried 25-mL round-bottom flask containing a Teflon-coated magnetic stir bar were brought into a N<sub>2</sub> glovebox and Pd(PPh<sub>3</sub>)<sub>4</sub> (34.7 mg, 0.03 mmol, 3 mol%) was added. The round bottom was sealed with a septa and removed from the glovebox. 4-bromo-*N,N*-dimethylaniline (200 mg, 1.00 mmol, 1.00 equiv) and 3,5-bis(trifluoromethyl)phenylboronic acid (257 mg, 1.00 mmol, 1.00 equiv) were added, followed by toluene (10 mL, 0.1M), EtOH (3 mL, 0.33M), and Sat. Na<sub>2</sub>CO<sub>3</sub> (5 mL). A reflux condensor was added and the reaction was heated to 80 °C overnight. The reaction was cooled to room temperature and quenched with H<sub>2</sub>O (20 mL) and Et<sub>2</sub>O (20 mL). The mixture was then extracted 2x20 mL Et<sub>2</sub>O. The organic layers were washed with 50 mL brine, then dried over MgSO<sub>4</sub>. The organics were concentrate and purified by flash chromatography (100% to 95:5 hexanes/EtOAc) gave the title compound as a white solid in quantitative yield (333 mg, 1.00 mmol).<sup>[5]</sup>

**<sup>1</sup>H NMR** (400 MHz, Chloroform-*d*)  $\delta$  7.97 (s, 2H), 7.74 (s, 1H), 7.63 – 7.47 (m, 2H), 6.90 – 6.74 (m, 2H), 3.04 (s, 6H).

**<sup>13</sup>C NMR** (100 MHz, Chloroform-*d*)  $\delta$  150.98, 143.38, 132.01 (q, *J* = 32.9 Hz), 127.96, 126.04, 123.74 (q, *J* = 273.6 Hz), 119.56 – 118.93 (m), 112.76, 40.45.

**<sup>19</sup>F NMR** (376 MHz, Chloroform-*d*)  $\delta$  -62.91.

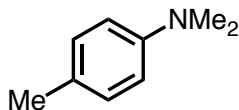

**6**

*N,N*,4-trimethylaniline (**6**)

The general procedure for reductive amination was followed using *p*-toluidine (107 mg, 1.00 mmol, 1.00 equiv), NaHB(OAc)<sub>3</sub> (636 mg, 3.00 mmol, 3.00 equiv), formaldehyde solution (37%) (0.45 mL, 6.00 mmol, 6.00 equiv), K<sub>2</sub>CO<sub>3</sub> (276 mg, 2.00 mmol, 2.00 equiv), AcOH (0.7 mL, 11.00 mmol, 11.00 equiv), CH<sub>3</sub>CN (4 mL, 0.25M). Purification by flash chromatography (100% to 95:5 hexanes/EtOAc) gave the title compound as a colorless oil in 23% yield (31 mg, 0.23 mmol). The spectral data matches that previously reported in the literature.<sup>[6]</sup>

<sup>1</sup>H NMR (500 MHz, Chloroform-*d*) δ 7.08 (d, *J* = 8.0 Hz, 2H), 6.71 (d, *J* = 8.0 Hz, 2H), 2.92 (s, 6H), 2.28 (s, 3H).

<sup>13</sup>C NMR (126 MHz, Chloroform-*d*) δ 148.97, 129.71, 126.22, 113.34, 41.21, 20.39.

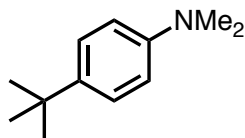

**7**

4-(*tert*-butyl)-*N,N*-dimethylaniline (**7**)

The general procedure for reductive amination was followed using 4-(*tert*-butyl)aniline (597 mg, 4.00 mmol, 1.00 equiv), NaHB(OAc)<sub>3</sub> (2.54 g, 12.00 mmol, 3.00 equiv), formaldehyde solution (37%) (1.05 mL, 14.00 mmol, 3.52 equiv), K<sub>2</sub>CO<sub>3</sub> (1.11 g, 8.00 mmol, 2.00 equiv), AcOH (2 mL, 34.70 mmol, 8.70 equiv), CH<sub>3</sub>CN (8 mL, 0.2M). Purification by flash chromatography (100% to 95:5 hexanes/EtOAc) gave the title compound as a colorless oil in quantitative yield (710 mg, 4.00 mmol). The spectral data matches that previously reported in the literature.<sup>[7]</sup>

<sup>1</sup>H NMR (500 MHz, Chloroform-*d*) δ 7.34 – 7.26 (m, 2H), 6.81 – 6.71 (m, 2H), 2.93 (s, 6H), 1.31 (s, 9H).

<sup>13</sup>C NMR (126 MHz, Chloroform-*d*) δ 148.71, 139.51, 125.98, 112.76, 40.99, 33.89, 31.67.

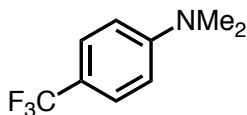

**8**

*N,N*-dimethyl-4-(trifluoromethyl)aniline (**8**)

The general procedure for reductive amination was followed using 4-aminobenzotrifluoride (1.40 mL, 11.18 mmol, 1.00 equiv), NaHB(OAc)<sub>3</sub> (7.00 g, 34.54 mmol, 3.0 equiv), formaldehyde solution (37%) (4.99 mL, 67.08 mmol, 6.00 equiv), K<sub>2</sub>CO<sub>3</sub> (3 g, 22.36 mmol, 2.00 equiv), AcOH (5 mL, 79.99 mmol, 7.09 equiv), CH<sub>3</sub>CN (56 mL, 0.2M). Purification by flash chromatography (95:5 hexanes/EtOAc) gave the title compound as a white solid in 36% yield (751 mg, 4.02 mmol). The spectral data matches that previously reported in the literature.<sup>[8]</sup>

**<sup>1</sup>H NMR** (500 MHz, Chloroform-*d*)  $\delta$  7.45 (d,  $J$  = 8.4 Hz, 2H), 6.70 (d,  $J$  = 8.4 Hz, 2H), 3.01 (s, 6H).

**<sup>13</sup>C NMR** (126 MHz, Chloroform-*d*)  $\delta$  152.45, 126.44 (q,  $J$  = 3.8 Hz), 117.59 (q,  $J$  = 32.6 Hz), 111.28, 40.19.

**<sup>19</sup>F NMR** (471 MHz, Chloroform-*d*)  $\delta$  -60.86.

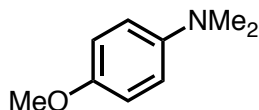

**9**

4-methoxy-*N,N*-dimethylaniline (**9**)

The general procedure for reductive amination was followed using *p*-anisidine (493mg, 4.00 mmol, 1.00 equiv), NaHB(OAc)<sub>3</sub> (2.54 g, 12.00 mmol, 3.00 equiv), formaldehyde solution (37%) (1.05 mL, 14.00 mmol, 3.52 equiv), K<sub>2</sub>CO<sub>3</sub> (1.11 g, 8.00 mmol, 2.00 equiv), AcOH (2 mL, 34.70 mmol, 8.70 equiv), CH<sub>3</sub>CN (8 mL, 0.2M). Purification by flash chromatography (90:10 hexanes/EtOAc) gave the title compound as a light yellow solid in 99% yield (600 mg, 3.97 mmol). The spectral data matches that previously reported in the literature.<sup>[9]</sup>

**<sup>1</sup>H NMR** (500 MHz, Chloroform-*d*)  $\delta$  6.86 (d,  $J$  = 9.2 Hz, 2H), 6.80 – 6.74 (m, 2H), 3.78 (s, 3H), 2.88 (s, 6H).

**<sup>13</sup>C NMR** (126 MHz, Chloroform-*d*)  $\delta$  152.08, 145.90, 115.01, 114.74, 55.87, 41.95.

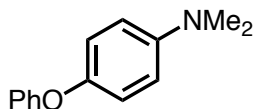

**10**

*N,N*-dimethyl-4-phenoxyaniline (**10**)

The general procedure for reductive amination was followed using 4-phenoxyaniline (741mg, 4.00 mmol, 1.00 equiv), NaHB(OAc)<sub>3</sub> (2.54 g, 12.00 mmol, 3.00 equiv), formaldehyde solution (37%) (1.05 mL, 14.00 mmol, 3.52 equiv), K<sub>2</sub>CO<sub>3</sub> (1.11 g, 8.00 mmol, 2.00 equiv), AcOH (2 mL, 34.70 mmol, 8.70 equiv), CH<sub>3</sub>CN (8 mL, 0.2M). Purification by flash chromatography (95:5 hexanes/EtOAc) gave the title compound as a clear oil in 94% yield (600 mg, 3.75 mmol). The spectral data matches that previously reported in the literature.<sup>[10]</sup>

**<sup>1</sup>H NMR** (500 MHz, Chloroform-*d*)  $\delta$  7.28 (d,  $J$  = 7.5 Hz, 1H), 7.03 – 6.99 (m, 1H), 6.96 (d,  $J$  = 9.0 Hz, 2H), 6.95 – 6.91 (m, 2H), 6.74 (d,  $J$  = 9.0 Hz, 2H), 2.94 (s, 6H).

**<sup>13</sup>C NMR** (126 MHz, Chloroform-*d*)  $\delta$  159.23, 147.80, 147.43, 129.62, 122.05, 121.06, 117.28, 114.08, 41.36.

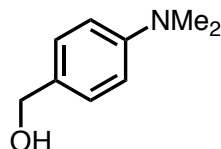

**11'**

(4-(dimethylamino)phenyl)methanol (**11'**)



To an oven-dried 10-mL round-bottom flask containing a Teflon-coated magnetic stir bar under a nitrogen atmosphere was added 4-dimethylaminobenzaldehyde (149 mg, 1.00 mmol, 1.00 equiv) and THF (2.5 mL, 0.25M). The flask was cooled to 0 °C and LiAlH<sub>4</sub> (38 mg, 1.00 mmol, 1.00 equiv) was added. The reaction was stirred for 4 hours at 0 °C before quenching with MeOH (2 mL) and H<sub>2</sub>O (2 mL). The reaction was diluted with 10 mL H<sub>2</sub>O and extracted 3x10 mL Et<sub>2</sub>O. The organic layers were dried with 20 mL brine and then MgSO<sub>4</sub> before concentrating. Purification by flash chromatography (90:10 hexanes/EtOAc) gave the title compound as a clear oil in 95% yield (144 mg, 0.952 mmol). The spectral data matches that previously reported in the literature.<sup>[11]</sup>

**<sup>1</sup>H NMR** (400 MHz, Chloroform-*d*) δ 7.25 (d, *J* = 8.3 Hz, 2H), 6.84 – 6.62 (m, 2H), 4.57 (s, 2H), 2.96 (s, 6H).

**<sup>13</sup>C NMR** (100 MHz, Chloroform-*d*) δ 150.51, 129.02, 128.77, 112.76, 65.51, 40.79.

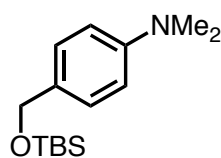

**11**

4-(((*tert*-butyldimethylsilyl)oxy)methyl)-*N,N*-dimethylaniline (**11**)

To an oven-dried 25-mL round-bottom flask containing a Teflon-coated magnetic stir bar under a nitrogen atmosphere were added **11'** (1.00 g, 6.61 mmol, 1.00 equiv) and DCM (6.60 mL, 1M). The solution was cooled to 0 °C before adding TBSCl (1.00 g, 6.61 mmol, 1.00 equiv) and imidazole (900 mg, 13.22 mmol, 2.00 equiv). The reaction was then warmed to room temperature and stirred for 15 min. The reaction was quenched with sat. NaHCO<sub>3</sub> and extracted 3x30 mL hexanes. The organics were dried 1x30 mL brine and Na<sub>2</sub>SO<sub>4</sub> before concentrating. The title compound was obtained in yield as a clear oil in 94% yield (1.65 g, 6.23 mmol) pure by NMR.

**<sup>1</sup>H NMR** (401 MHz, Chloroform-*d*) δ 7.19 (d, *J* = 8.6 Hz, 2H), 6.72 (d, *J* = 8.7 Hz, 2H), 4.64 (s, 2H), 2.93 (s, 6H), 0.93 (s, 9H), 0.08 (s, 6H).

**<sup>13</sup>C NMR** (126 MHz, Chloroform-*d*) δ 150.07, 129.66, 127.66, 112.76, 65.15, 40.95, 26.17, 25.80, -4.97.

**HRMS** (ESI) (*m/z*): [M+H] calculated for C<sub>15</sub>H<sub>27</sub>NOSi, 266.1940, found, 266.1945.

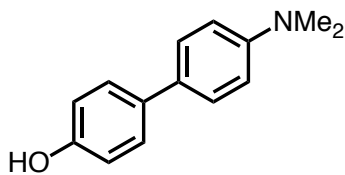

**12'**

4'-(dimethylamino)-[1,1'-biphenyl]-4-ol (**12'**)

The general procedure for Suzuki-Miura coupling was followed using 4-bromo-dimethylaniline (200 mg, 1.00 mmol, 1.00 equiv), 4-hydroxyphenylboronic acid (207mg, 1.5 mmol, 1.50 equiv), K<sub>2</sub>CO<sub>3</sub> (275 mg, 2.00 mmol, 2.00 equiv), Pd(OAc)<sub>2</sub> (2.2 mg, 0.01 mmol, 0.01 equiv), acetylacetone (2 mg, 0.02 mmol, 0.02 equiv), H<sub>2</sub>O (2 mL), and DMF (2 mL). Purification by flash chromatography (70:30 hexanes/EtOAc) gave the title compound as a white solid in 95% yield (203 mg, 0.952 mmol). The spectral data matches that previously reported in the

literature.<sup>[12]</sup>

**<sup>1</sup>H NMR** (500 MHz, Chloroform-*d*)  $\delta$  9.74 (br), 7.52 – 7.34 (m, 4H), 6.95 – 6.72 (m, 4H), 2.97 (s, 6H).

**<sup>13</sup>C NMR** (126 MHz, Chloroform-*d*)  $\delta$  154.30, 149.76, 134.27, 129.54, 127.69, 127.44, 115.68, 113.33, 40.95.

**HRMS** (EI) (m/z): [M] calculated for C<sub>20</sub>H<sub>29</sub>NOSi, 328.2091, found, 328.2096.

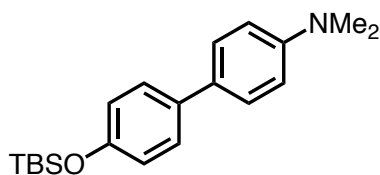

**12**

4'-((*tert*-butyldimethylsilyl)oxy)-*N,N*-dimethyl-[1,1'-biphenyl]-4-amine (**12**)

To an oven-dried 25-mL round-bottom flask containing a Teflon-coated magnetic stir bar under a nitrogen atmosphere were added **12'** (670 mg, 3.14 mmol, 1.00 equiv) and DCM (6.28 mL, 0.5M). The solution was cooled to 0 °C before adding TBSCl (473 mg, 3.14 mmol, 1.00 equiv) and imidazole (428 mg, 6.28 mmol, 2.00 equiv). The reaction was then warmed to room temperature and stirred for 15 min. The reaction was quenched with sat. NaHCO<sub>3</sub> and extracted 3x30 mL hexanes. The organics were dried 1x30 mL brine and Na<sub>2</sub>SO<sub>4</sub> before concentrating. The title compound was obtained in yield as an off-white crystalline solid in 76% yield (780 mg, 2.39 mmol) pure by NMR.

**<sup>1</sup>H NMR** (500 MHz, Chloroform-*d*)  $\delta$  7.45 (d, *J* = 8.7 Hz, 2H), 7.41 (d, *J* = 8.6 Hz, 2H), 6.87 (d, *J* = 8.5 Hz, 2H), 6.80 (d, *J* = 8.3 Hz, 2H), 2.98 (s, 6H), 1.01 (s, 9H), 0.23 (s, 6H).

**<sup>13</sup>C NMR** (126 MHz, Chloroform-*d*)  $\delta$  154.40, 149.73, 134.57, 129.41, 127.45, 127.34, 120.34, 113.04, 40.83, 25.88, 18.39, -4.22.

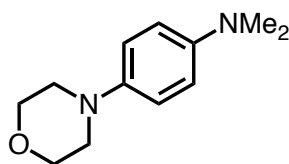

**13**

*N,N*-dimethyl-4-morpholinoaniline (**13**)

To an oven-dried 25-mL round-bottom flask containing a Teflon-coated magnetic stir bar were brought into a N<sub>2</sub> glovebox and Pd<sub>2</sub>(dba)<sub>3</sub> (11.4 mg, 0.0125 mmol, 0.5 mol%), P(*tert*-Bu)<sub>3</sub> (5.1 mg, 0.05 mmol, 1 mol%), and NaO-*t*-Bu (250 mg, 2.50 mmol, 1.00 equiv) were added. The round bottom was sealed with a septa and removed from the glovebox. Toluene (5 mL, 0.5M) and morpholine (0.27 mL, 3.12 mmol, 1.25 equiv) were added, followed by 3-bromo-*N,N*-dimethylaniline (500 mg, 2.50 mmol, 1.00 equiv). The reaction was stirred at room temperature overnight. The reaction was quenched with 20 mL H<sub>2</sub>O and extracted 3x30 mL Et<sub>2</sub>O. The organics were washed with 60 mL brine and dried over MgSO<sub>4</sub> before concentrating. Purification by flash chromatography (90:10 to 1:1 hexanes/EtOAc) gave the title compound as a yellowish

powder in 62% yield (320 mg, 1.55 mmol). The spectral data matches that previously reported in the literature.<sup>[13]</sup>

**<sup>1</sup>H NMR** (500 MHz, Chloroform-*d*)  $\delta$  6.90 (d,  $J$  = 8.9 Hz, 2H), 6.76 (d,  $J$  = 9.0 Hz, 2H), 3.89 – 3.84 (m, 4H), 3.08 – 3.01 (m, 4H), 2.88 (s, 6H).

**<sup>13</sup>C NMR** (126 MHz, Chloroform-*d*)  $\delta$  151.98, 138.24, 120.93, 115.53, 66.59, 58.13, 47.97.

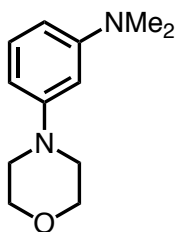

**14**

*N,N*-dimethyl-3-morpholinoaniline (**14**)

To an oven-dried 25-mL round-bottom flask containing a Teflon-coated magnetic stir bar were brought into a N<sub>2</sub> glovebox and Pd<sub>2</sub>(dba)<sub>3</sub> (22.9 mg, 0.025 mmol, 0.5 mol%), P(*tert*-Bu)<sub>3</sub> (10.1 mg, 0.05 mmol, 1 mol%), and NaO-*t*-Bu (481 mg, 5.00 mmol, 1.00 equiv) were added. The round bottom was sealed with a septa and removed from the glovebox. Toluene (10 mL, 0.5M) and morpholine (0.54 mL, 6.25 mmol, 1.25 equiv) were added, followed by 3-bromo-*N,N*-dimethylaniline (1.00 g, 5.00 mmol, 1.00 equiv). The reaction was stirred at room temperature overnight. The reaction was quenched with 20 mL H<sub>2</sub>O and extracted 3x30 mL Et<sub>2</sub>O. The organics were washed with 60 mL brine and dried over MgSO<sub>4</sub> before concentrating. Purification by flash chromatography (70:30 hexanes/EtOAc) gave the title compound as a yellowish oil in 35% yield (360 mg, 1.80 mmol). The spectral data matches that previously reported in the literature.<sup>[13]</sup>

**<sup>1</sup>H NMR** (500 MHz, Chloroform-*d*)  $\delta$  7.15 (t,  $J$  = 8.1 Hz, 1H), 6.34 (dd,  $J$  = 8.2, 2.1 Hz, 2H), 6.28 (s, 1H), 3.86 (t,  $J$  = 4.7 Hz, 4H), 3.16 (t,  $J$  = 4.7 Hz, 4H), 2.94 (s, 6H).

**<sup>13</sup>C NMR** (126 MHz, Chloroform-*d*)  $\delta$  152.66, 151.83, 129.76, 105.63, 105.11, 100.89, 67.21, 50.00, 40.90.

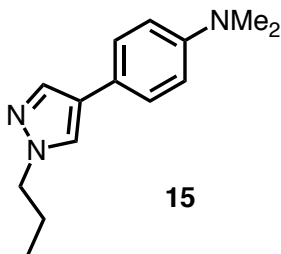

**15**

*N,N*-dimethyl-4-(1-propyl-1H-pyrazol-4-yl)aniline (**15**)

The general procedure for Suzuki-Miura coupling was followed using 4-bromo-dimethylaniline (400 mg, 2.00 mmol, 1.00 equiv), 1-propylpyrazole-4-boronic acid (462mg, 3.00 mmol, 1.50 equiv), K<sub>2</sub>CO<sub>3</sub> (553 mg, 4.00 mmol, 2.00 equiv), Pd(OAc)<sub>2</sub> (4.5 mg, 0.02 mmol, 0.01 equiv),

acetylacetone (4 mg, 0.04 mmol, 0.02 equiv), H<sub>2</sub>O (7 mL), and DMF (7 mL). Purification by flash chromatography (80:20 hexanes/EtOAc) gave the title compound as a white solid in 76% yield (350 mg, 1.52 mmol).

**<sup>1</sup>H NMR** (500 MHz, Chloroform-*d*)  $\delta$  7.69 (d, *J* = 0.8 Hz, 1H), 7.52 (d, *J* = 0.8 Hz, 1H), 7.36 (d, *J* = 8.8 Hz, 2H), 6.75 (d, *J* = 8.8 Hz, 2H), 4.09 (t, *J* = 7.1 Hz, 2H), 2.96 (s, 6H), 1.92 (q, *J* = 7.3 Hz, 2H), 0.95 (t, *J* = 7.4 Hz, 3H).

**<sup>13</sup>C NMR** (126 MHz, Chloroform-*d*)  $\delta$  149.45, 136.17, 126.49, 125.09, 123.07, 121.47, 113.18, 54.08, 40.86, 23.93, 11.34.

**HRMS** (ESI) (*m/z*): [*M*+*H*] calculated for C<sub>14</sub>H<sub>19</sub>N<sub>3</sub>, 230.1657, found, 230.1649.

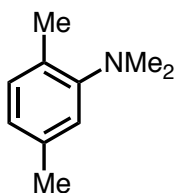

### 16

*N,N*,2,5-tetramethylaniline (**16**)

The general procedure for reductive amination was followed using 2,5-dimethylaniline (0.5 mL, 4.06 mmol, 1.00 equiv), NaHB(OAc)<sub>3</sub> (2.59 g, 12.20 mmol, 3.00 equiv), formaldehyde solution (37%) (1.05 mL, 14.00 mmol, 3.52 equiv), K<sub>2</sub>CO<sub>3</sub> (1.12 g, 8.12 mmol, 2.00 equiv), AcOH (2 mL, 34.70 mmol, 8.70 equiv), CH<sub>3</sub>CN (8 mL, 0.2M). Aqueous workup gave the title compound as a clear oil, pure by NMR, in 76% yield (450 mg, 3.09 mmol). The spectral data matches that previously reported in the literature.<sup>[14]</sup>

**<sup>1</sup>H NMR** (500 MHz, Chloroform-*d*)  $\delta$  7.04 (d, *J* = 7.5 Hz, 1H), 6.84 (s, 1H), 6.77 (d, *J* = 7.6 Hz, 1H), 2.69 (s, 6H), 2.31 (s, 3H), 2.28 (s, 3H).

**<sup>13</sup>C NMR** (126 MHz, Chloroform-*d*)  $\delta$  153.46, 136.07, 131.12, 128.97, 123.33, 119.26, 44.39, 21.36, 18.10.

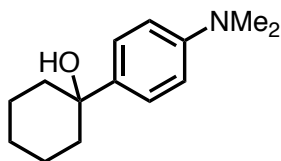

### 17'

1-(4-(dimethylamino)phenyl)cyclohexan-1-ol (**17'**)

To an oven-dried 10--mL round-bottom flask containing a Teflon-coated magnetic stir bar were added freshly ground magnesium metal (64 mg, 2.62 mmol, 1.05 equiv) and 4-bromodimethylaniline (500 mg, 2.50 mmol, 1.00 equiv). THF (4 mL) was added along with a small crystal of I<sub>2</sub> (to activate the magnesium) and the mixture was stirred until nearly all of the magnesium was consumed. The mixture was cooled in a salt/ice bath for 10 minutes before adding cyclohexanone (0.23 mL, 2.25 mmol, 0.90 equiv) dropwise. The reaction was then stirred

for 1 hour before warming to room temperature overnight. The solution was poured into a sat.  $\text{NH}_4\text{Cl}$  solution and extracted 3x20 mL DCM. The organics were dried over  $\text{Na}_2\text{SO}_4$  and concentrated. Purification by flash chromatography (90:10 to 80:20 hexanes/EtOAc) gave the title compound as a white solid in 45% yield (224 mg, 1.02 mmol). The spectral data matches that previously reported in the literature.<sup>[15]</sup>

**$^1\text{H}$  NMR** (500 MHz, Chloroform-*d*)  $\delta$  7.42 (dd,  $J$  = 8.9, 2.2 Hz, 2H), 6.78 (dd,  $J$  = 8.9, 2.2 Hz, 2H), 2.98 (s, 6H), 1.93 – 1.72 (m, 8H), 1.64 (dd,  $J$  = 11.1, 4.7 Hz, 2H), 1.40 – 1.26 (m, 1H).

**$^{13}\text{C}$  NMR** (126 MHz, Chloroform-*d*)  $\delta$  149.36, 137.50, 125.46, 112.41, 72.48, 40.66, 38.80, 25.66, 22.38.

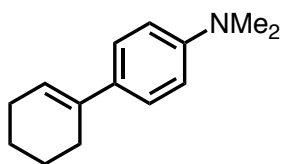

**17**

*N,N*-dimethyl-2',3',4',5'-tetrahydro-[1,1'-biphenyl]-4-amine (**17**)

To an oven-dried 8-mL vial containing a Teflon-coated magnetic stir bar were added **17'** (224 mg, 1.02 mmol, 1.00 equiv) and trifluoroacetic acid (1.30 mL, 0.8M). The vial was sealed with a Teflon cap and stirred at room temperature for 15 min. The reaction was then poured into a flask containing 20 mL of a sat.  $\text{NaHCO}_3$ . The contents were then transferred to a separatory funnel and extracted 3x10 mL  $\text{Et}_2\text{O}$ . The organic layers were dried over  $\text{Mg}_2\text{SO}_4$  and concentrated to give the title compound as a white solid in quantitative yield (210 mg, 1.02 mmol), which was pure by NMR. The spectral data matches that previously reported in the literature.<sup>[15]</sup>

**$^1\text{H}$  NMR** (400 MHz, Chloroform-*d*)  $\delta$  7.30 (d,  $J$  = 8.4 Hz, 2H), 6.71 (d,  $J$  = 8.4 Hz, 2H), 6.01 (s, 1H), 2.94 (s, 6H), 2.39 (q,  $J$  = 5.2 Hz, 2H), 2.19 (dq,  $J$  = 6.4, 3.2 Hz, 2H), 1.77 (q,  $J$  = 5.9 Hz, 2H), 1.66 (q,  $J$  = 5.9 Hz, 2H).

**$^{13}\text{C}$  NMR** (100 MHz, Chloroform-*d*)  $\delta$  149.64, 136.12, 131.33, 125.67, 121.70, 112.63, 40.87, 27.48, 26.01, 23.36, 22.50.

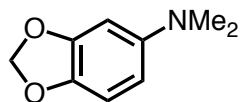

**18**

*N,N*-dimethylbenzo[*d*][1,3]dioxol-5-amine (**18**)

A modified general procedure for reductive amination was followed using 3,4-(dimethyleneoxy)aniline (2 g, 14.06 mmol, 1.00 equiv),  $\text{NaH}_3\text{BCN}$  (917 mg, 14.06 mmol, 1.00 equiv), formaldehyde solution (37%) (3.60 mL, 45.2 mmol, 3.10 equiv),  $\text{ZnCl}_2$  (1 g, 7.30 mmol, 0.50 equiv), MeOH (70 mL, 0.2M). Aqueous workup gave the title compound as a clear oil, pure by NMR, in 14% yield (340 mg, 1.97 mmol). The spectral data matches that previously reported in the literature.<sup>[16]</sup>

**<sup>1</sup>H NMR** (401 MHz, Chloroform-*d*)  $\delta$  6.72 (d,  $J$  = 8.5 Hz, 1H), 6.42 (d,  $J$  = 2.5 Hz, 1H), 6.17 (dd,  $J$  = 8.5, 2.5 Hz, 1H), 5.87 (s, 2H), 2.86 (s, 6H).

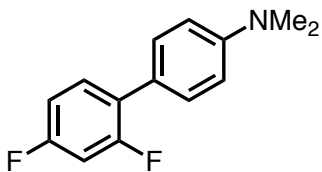

**19**

2',4'-difluoro-*N,N*-dimethyl-[1,1'-biphenyl]-4-amine (**19**)

The general procedure for Suzuki-Miura coupling was followed using 4-bromo-dimethylaniline (400 mg, 2.00 mmol, 1.00 equiv), 2,4-difluorophenylboronic acid (472mg, 3.00 mmol, 1.50 equiv), K<sub>2</sub>CO<sub>3</sub> (553 mg, 4.00 mmol, 2.00 equiv), Pd(OAc)<sub>2</sub> (4.5 mg, 0.02 mmol, 0.01 equiv), acetylacetone (4 mg, 0.04 mmol, 0.02 equiv), H<sub>2</sub>O (7 mL), and DMF (7 mL). Purification by flash chromatography (95:5 to 90:10 hexanes/EtOAc) gave the title compound as an off-white solid in quantitative yield.

**<sup>1</sup>H NMR** (400 MHz, Chloroform-*d*)  $\delta$  7.42 – 7.38 (m, 2H), 7.36 (dd,  $J$  = 8.9, 6.6 Hz, 1H), 6.89 (dddd,  $J$  = 13.3, 11.3, 8.5, 2.7 Hz, 2H), 6.82 – 6.76 (m, 2H), 3.00 (s, 6H).

**<sup>13</sup>C NMR** (126 MHz, Chloroform-*d*)  $\delta$  162.63, 162.54, 150.14, 130.90 (q,  $J$  = 5.3 Hz) 129.70 (d,  $J$  = 3.2 Hz), 122.88, 112.45, 111.43 (dd,  $J$  = 3.6 Hz), 104.43 (d,  $J$  = 25.4 Hz), 104.22 (d,  $J$  = 25.3 Hz), 40.62.

**<sup>19</sup>F NMR** (471 MHz, Chloroform-*d*)  $\delta$  -113.56 (p,  $J$  = 7.6 Hz), -114.04 (q,  $J$  = 9.0 Hz).

**HRMS** (ESI) (m/z): [M+H] calculated for C<sub>14</sub>H<sub>13</sub>F<sub>2</sub>N, 234.1094, found, 234.1090.

#### IV) Supplemental Tables

**Table S1:** Ligand screening for the optimization of the silylation of **1a**

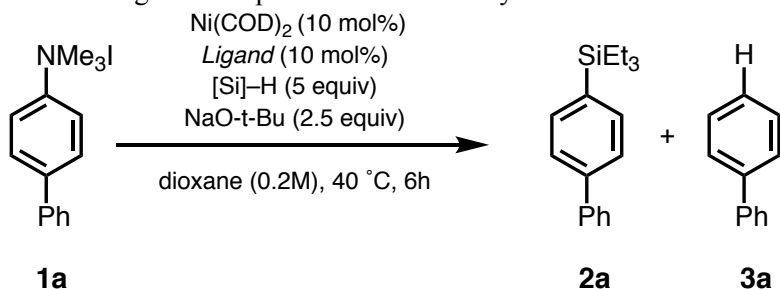

| Entry           | Ligand                | Yield <b>2a</b> (%) <sup>a</sup> | Yield <b>3a</b> (%) <sup>a</sup> |
|-----------------|-----------------------|----------------------------------|----------------------------------|
| 1               | PPh <sub>3</sub>      | <1                               | 5                                |
| 2               | PCy <sub>3</sub>      | <1                               | <1                               |
| 3               | ICyHCl                | <1                               | 1                                |
| 4               | IMesHCl               | <1                               | 1                                |
| 5               | IPrHCl                | 14                               | 7                                |
| 6               | IPr <sup>Me</sup> HCl | 21                               | 5                                |
| 7               | IPr <sup>Cl</sup> HCl | 12                               | 8                                |
| 8               | IPr*OMeHCl            | 89                               | 11                               |
| 9               | none                  | <1                               | <1                               |
| 10 <sup>b</sup> | none                  | 10                               | 90                               |

Following the general procedure for silylation of ammonium salts, reaction were run for 6 hours, and quenched. <sup>a</sup> Yield determined by GCFID of the crude reaction mixture using tridecane as an internal standard. <sup>b</sup> Used DMF instead of dioxane

**Table S2:** Solvent screening for the optimization of the silylation of **1a**

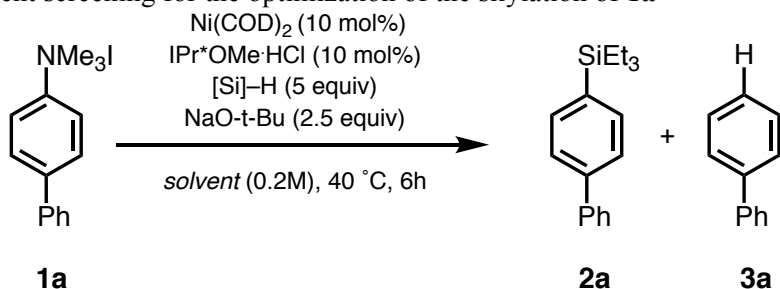

| Entry | Solvent            | Yield <b>2a</b> (%) <sup>a</sup> | Yield <b>3a</b> (%) <sup>a</sup> |
|-------|--------------------|----------------------------------|----------------------------------|
| 1     | MeOH               | <1                               | 1                                |
| 2     | CH <sub>3</sub> CN | <1                               | 5                                |
| 3     | DME                | <1                               | 3                                |
| 4     | toluene            | 6                                | 4                                |
| 5     | Et <sub>2</sub> O  | 5                                | 6                                |
| 6     | THF                | 65                               | 37                               |
| 7     | dioxane            | 89                               | 11                               |

Following the general procedure for silylation of ammonium salts, reaction were run for 6 hours, and quenched. <sup>a</sup> Yield determined by GCFID of the crude reaction mixture using tridecane as an

internal standard.

**Table S3:** Base screening for the optimization of the silylation of **1a**

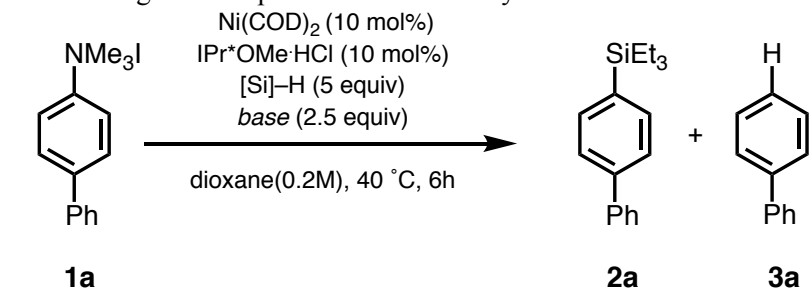

| Entry          | Base                     | Yield <b>2a</b> (%) <sup>a</sup> | Yield <b>3a</b> (%) <sup>a</sup> |
|----------------|--------------------------|----------------------------------|----------------------------------|
| 1              | none                     | <1                               | <1                               |
| 2              | NaOMe                    | 24                               | <1                               |
| 3              | LiO- <i>t</i> -Bu        | 41                               | 5                                |
| 4              | KO- <i>t</i> -Bu         | 48                               | 7                                |
| 5              | NaO- <i>t</i> -Bu        | 89                               | 11                               |
| 6 <sup>b</sup> | NaO- <i>t</i> -Bu        | 72                               | 13                               |
| 7              | $\text{Cs}_2\text{CO}_3$ | <1                               | <1                               |
| 8              | $\text{Et}_3\text{N}$    | 48                               | 7                                |
| 9              | pyridine                 | 55                               | 12                               |

Following the general procedure for silylation of ammonium salts, reaction were run for 6 hours, and quenched. <sup>a</sup> Yield determined by GC/FID of the crude reaction mixture using tridecane as an internal standard. <sup>b</sup> 1 equiv base used.

**Table S4:** Ligand screening for the optimization of the reduction of **8**

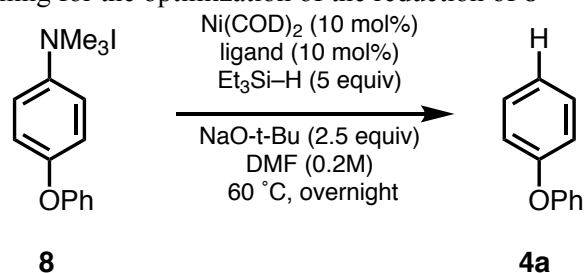

| Entry          | Ligand                                  | Yield <b>4a</b> (%) <sup>a</sup> |
|----------------|-----------------------------------------|----------------------------------|
| 1              | none                                    | 15                               |
| 2 <sup>b</sup> | $\text{PPh}_3$                          | 45                               |
| 3 <sup>b</sup> | $\text{PCy}_3$                          | 31                               |
| 4              | $\text{IMes}\cdot\text{HCl}$            | 56                               |
| 5              | $\text{SIMes}\cdot\text{HCl}$           | 47                               |
| 6              | $\text{IAd}\cdot\text{HCl}$             | 46                               |
| 8              | $\text{IPr}^*\text{OMe}\cdot\text{HCl}$ | 49                               |



Following the general procedure for silylation of ammonium salts, reaction were run for 12 hours, and quenched. <sup>a</sup> Yield determined by GC/FID of the crude reaction mixture using tridecane as an internal standard. <sup>b</sup> Reaction run for 6 hours.

**Table S5:** Solvent screening for the optimization of the reduction of **8**

| <b>8</b>       |         | <b>4a</b>                        |
|----------------|---------|----------------------------------|
| Entry          | Solvent | Yield <b>4a</b> (%) <sup>a</sup> |
| 1              | dioxane | 29                               |
| 2              | THF     | 27                               |
| 3              | DMF     | 56                               |
| 4 <sup>b</sup> | DMF     | 58                               |
| 5 <sup>c</sup> | DMF     | 51                               |
| 6 <sup>d</sup> | DMF     | 60                               |

Following the general procedure for silylation of ammonium salts, reaction were run for 12 hours, and quenched. <sup>a</sup> Yield determined by GC/FID of the crude reaction mixture using tridecane as an internal standard. <sup>b</sup> Reaction run at 80 °C. <sup>c</sup> Reaction run at 40 °C. <sup>d</sup> Reaction run at room temperature (21 °C).

**Table S6:** Reductant screening for the optimization of the reduction of **8**

| <b>8</b> |                                  | <b>4a</b>                        |
|----------|----------------------------------|----------------------------------|
| Entry    | Reductant                        | Yield <b>4a</b> (%) <sup>a</sup> |
| 1        | Et <sub>2</sub> SiH <sub>2</sub> | 54                               |
| 2        | Et <sub>3</sub> SiH              | 56                               |
| 3        | Ph <sub>3</sub> SiH              | 48                               |
| 4        | <i>i</i> -Pr <sub>3</sub> SiH    | 24                               |
| 5        | Me(OTMS) <sub>2</sub> SiH        | 18                               |
| 6        | Ti( <i>i</i> -OPr) <sub>4</sub>  | 42                               |

Following the general procedure for silylation of ammonium salts, reaction were run for 12 hours, and quenched. <sup>a</sup> Yield determined by GC/FID of the crude reaction mixture using tridecane as an internal standard.



## V) Calibration Curves

Solutions containing a constant concentration of an internal standard (tridecane (0.164 M) and varying concentrations of the desired product (0.05, 0.10, 0.15 and 0.20 M) were prepared in ethyl acetate. Each was analyzed by GC-FID and the response factor (F) calculated by solving equation S1 for the area of product to give equation S2, where the response factor (F) is the slope. Yields of crude reactions mixtures, containing a known amount of internal standard, were then determined by solving Equation S1 for the concentration of the product to give Equation S3 and filling in the known data from a crude reaction.

$$\frac{(\text{Area of Product})}{(\text{Concentration of Product})} = F \cdot \frac{(\text{Area of Standard})}{(\text{Concentration of Standard})}$$

(Equation S1)

$$(\text{Area of Product}) = F \cdot \left( \frac{(\text{Area of Standard})}{(\text{Concentration of Standard})} \right) (\text{Concentration of Product})$$

(Equation S2)

$$(\text{Concentration of Product}) = \frac{(\text{Concentration of Standard})(\text{Area of Product})}{(F \cdot (\text{Area of Standard}))}$$

(Equation S3)

Calibration curve for [1,1'-biphenyl]-4-yltriethylsilane (Compound 2a):

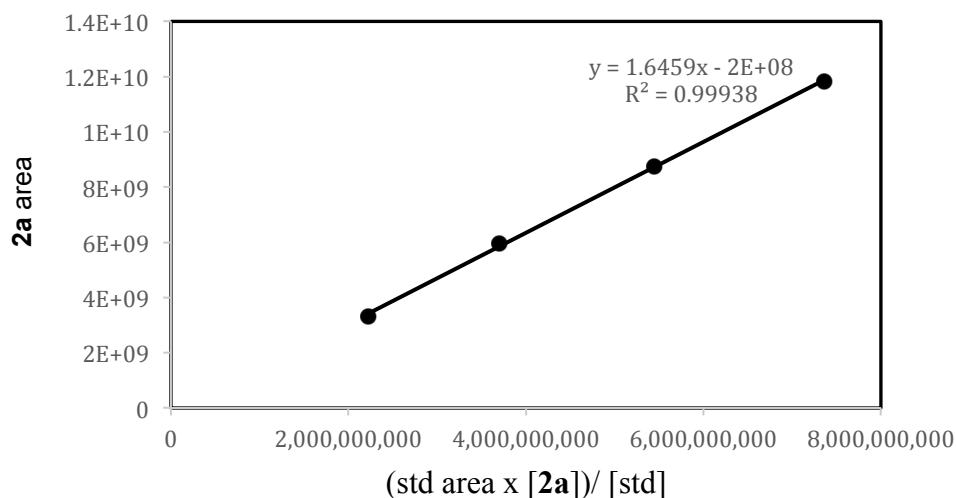

**Figure 1:** Plot of **2a** area versus (std area x **[2a]**) / [std] fitted to  $y = mx + b$  where  $m = 1.6459$  and  $b = -2 \times 10^8$  with a  $R^2$  of 0.9994.

| mmol 2a     | mmol tridecane | Area IS    | Area Pdt.   |
|-------------|----------------|------------|-------------|
| 0.048420739 | 0.16403        | 7535226346 | 3329460100  |
| 0.08715733  | 0.16403        | 6961574030 | 5961048038  |
| 0.143027414 | 0.16403        | 6242681983 | 8751150218  |
| 0.192938021 | 0.16403        | 6254367926 | 11816631504 |

**Calibration curve for [1,1'-biphenyl]-4-yl(benzyl)dimethylsilane (2b):**

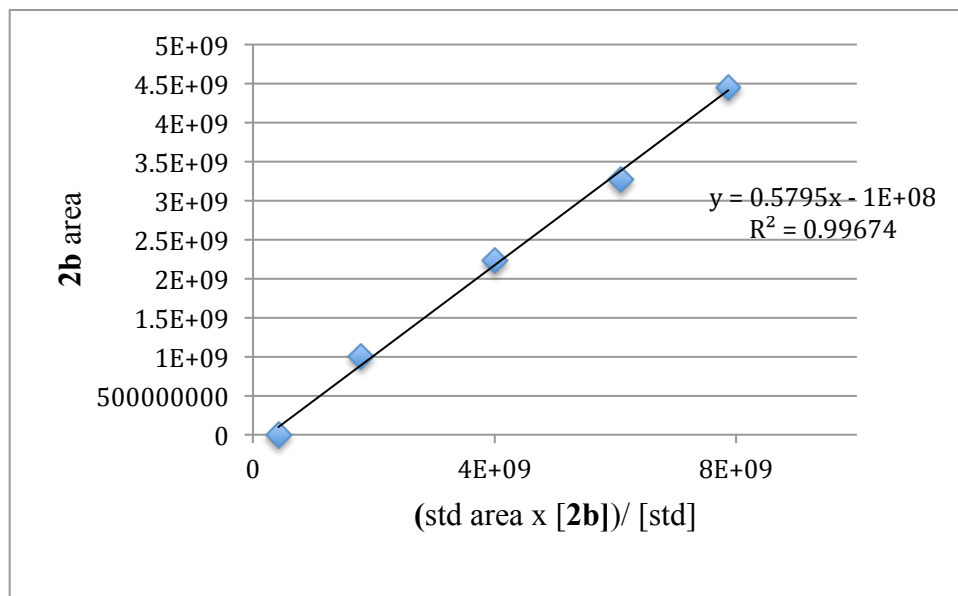

**Figure S2:** Plot of **2b** area versus (std area x **[2b]**) / [std] fitted to  $y = mx + b$  where  $m = 0.5795$  and  $b = -1 \times 10^8$  with a  $R^2$  of 0.99674.

| mmol 2b     | mmol tridecane | Area IS    | Area Pdt.  |
|-------------|----------------|------------|------------|
| 9.91768E-06 | 0.164026904    | 3947284982 | 419876796  |
| 0.049919006 | 0.164026904    | 3315120257 | 1789461089 |
| 0.102152137 | 0.164026904    | 3575670979 | 3999385208 |
| 0.150418196 | 0.164026904    | 3564399649 | 6087760854 |
| 0.199345433 | 0.164026904    | 3665141539 | 7872337807 |

**Calibration curve for biphenyl (3a):**

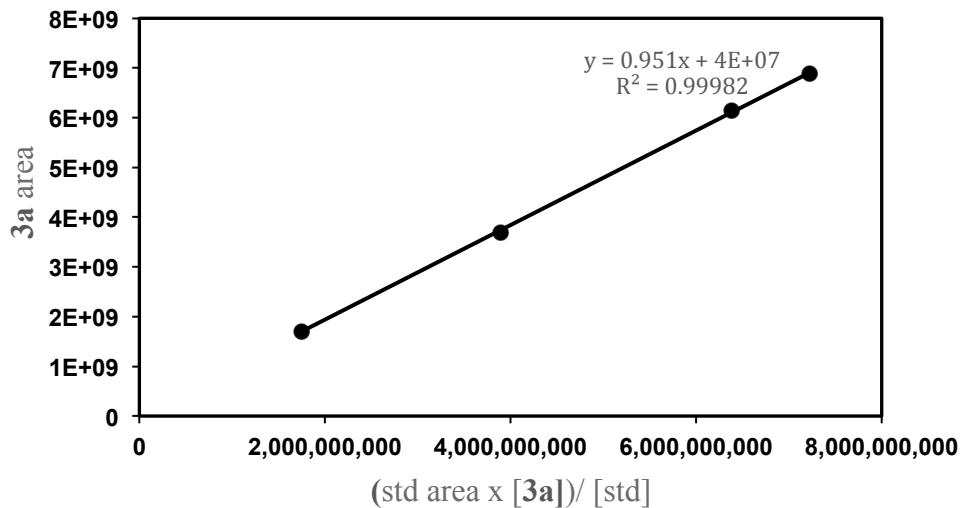

**Figure S3:** Plot of analyte area versus (std area x [3a]) / [std] fitted to  $y = mx + b$  where  $m = 0.951$  and  $b = 4 \times 10^7$  with a  $R^2$  of 0.9998.

| mmol 3a | mmol tridecane | Area IS    | Area Pdt.  |
|---------|----------------|------------|------------|
| 0.0509  | 0.16403        | 5647778523 | 1707314294 |
| 0.0966  | 0.16403        | 6596748815 | 3699921557 |
| 0.1582  | 0.16403        | 6622184645 | 6149186696 |
| 0.192   | 0.16403        | 6176751384 | 6891778392 |
| 0.0509  | 0.16403        | 5647778523 | 1707314294 |

**Calibration curve for diphenyl ether (4a):**

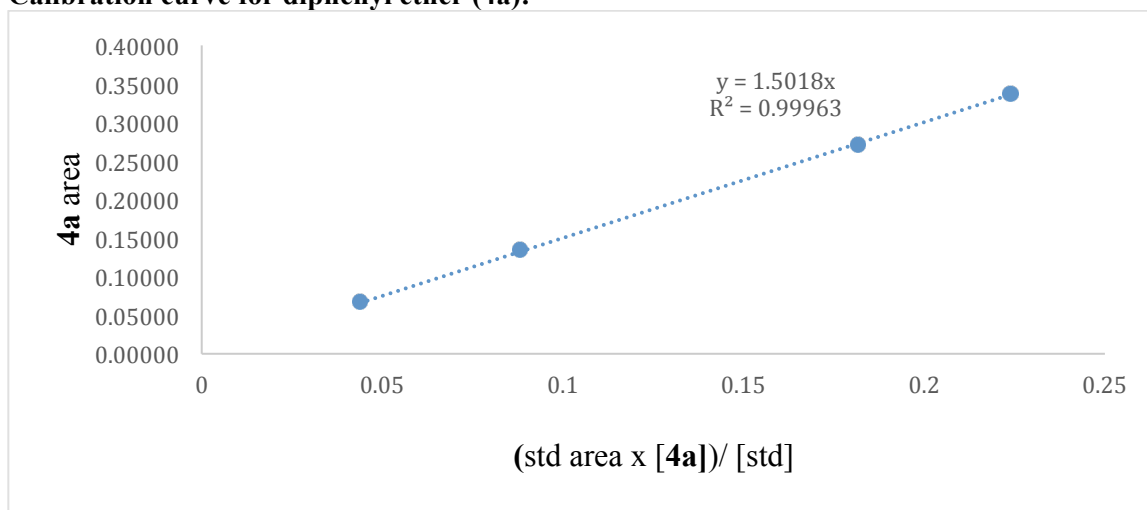

**Figure S4:** Plot of 4a area versus (std area x [4a]) / [std] fitted to  $y = mx + b$  where  $m = 1.5018$  and  $b = 0$  with a  $R^2$  of 0.99963.

| mmol 4a     | mmol tridecane | Area IS    | Area Pdt.  |
|-------------|----------------|------------|------------|
| 0.067830908 | 0.164026904    | 3611778993 | 964667595  |
| 0.134567768 | 0.164026904    | 3522436673 | 1891415126 |
| 0.202398676 | 0.164026904    | 3360770109 | 3112052070 |
| 0.270229584 | 0.164026904    | 3320105098 | 3676856664 |
| 0.336966444 | 0.164026904    | 3504987328 | 4783168130 |

**Calibration curve for trifluorotolunene (19b):**

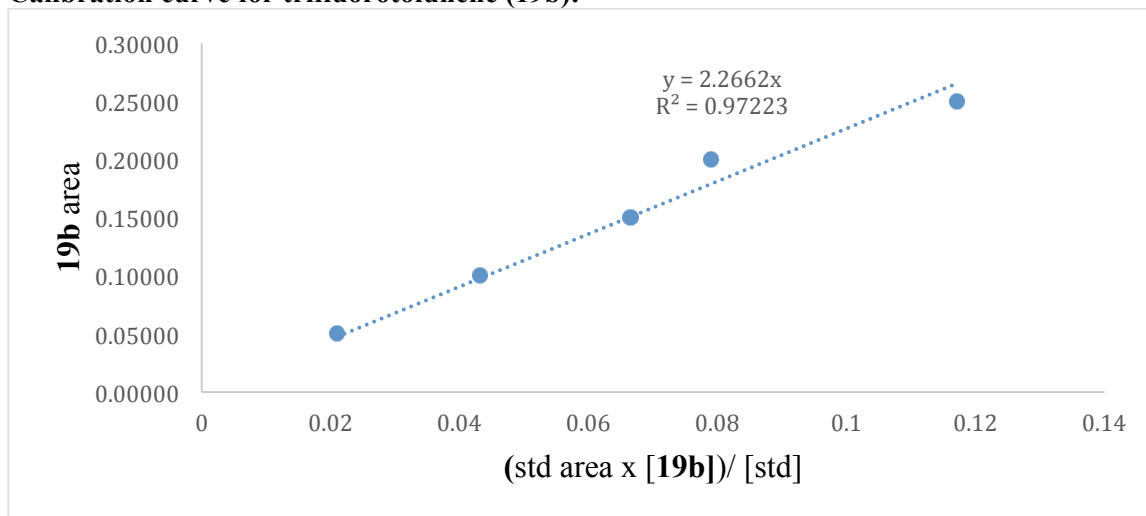

**Figure S5:** Plot of **19b** area versus (std area x [19b]) / [std] fitted to  $y = mx + b$  where  $m = 2.2662$  and  $b = 0$  with a  $R^2$  of 0.97223.

| mmol 19b    | mmol tridecane | Area IS    | Area Pdt.  |
|-------------|----------------|------------|------------|
| 0.050030799 | 0.16403        | 4492524320 | 574994724  |
| 0.100061597 | 0.16403        | 3927418367 | 1032274349 |
| 0.150092396 | 0.16403        | 4914023783 | 1990948584 |
| 0.200123195 | 0.16403        | 3902305473 | 1878381691 |
| 0.250153994 | 0.16403        | 4893566950 | 3494602386 |

**Calibration curve for anisole (19c):**

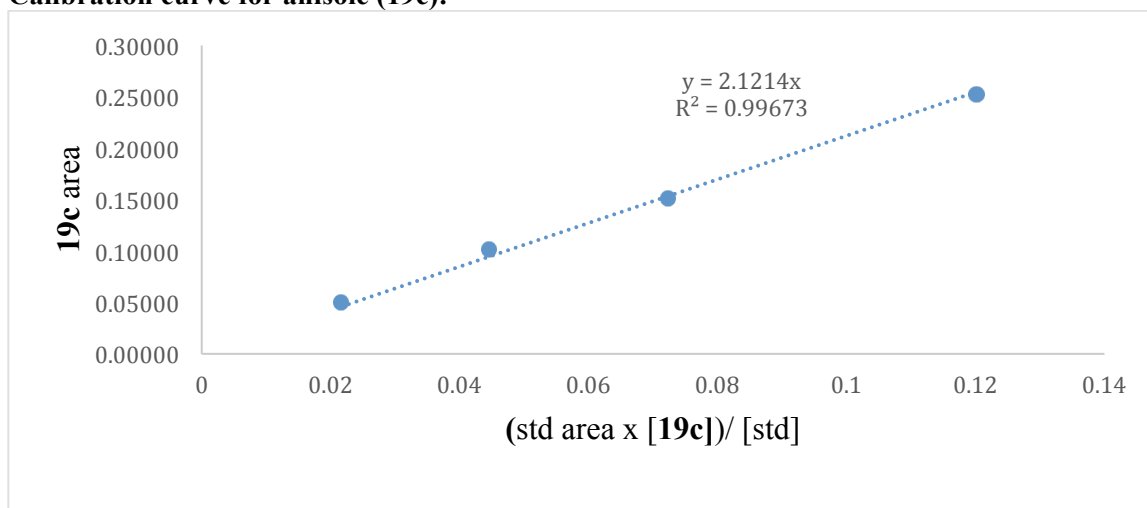

**Figure S6:** Plot of **19c** area versus (std area x [**19c**]) / [std] fitted to  $y = mx + b$  where  $m = 2.1214$  and  $b = 0$  with a  $R^2$  of 0.99673.

| mmol 19c    | mmol tridecane | Area IS    | Area Pdt.  |
|-------------|----------------|------------|------------|
| 0.0501862   | 0.164026904    | 4000104738 | 527950383  |
| 0.101301774 | 0.164026904    | 3537739243 | 960449091  |
| 0.151487974 | 0.164026904    | 3236629289 | 1427195136 |
| 0.201674174 | 0.164026904    | 3602495138 | 1828214896 |
| 0.252789749 | 0.164026904    | 3975653755 | 2912617178 |

**Calibration curve for naphthalene (19e):**

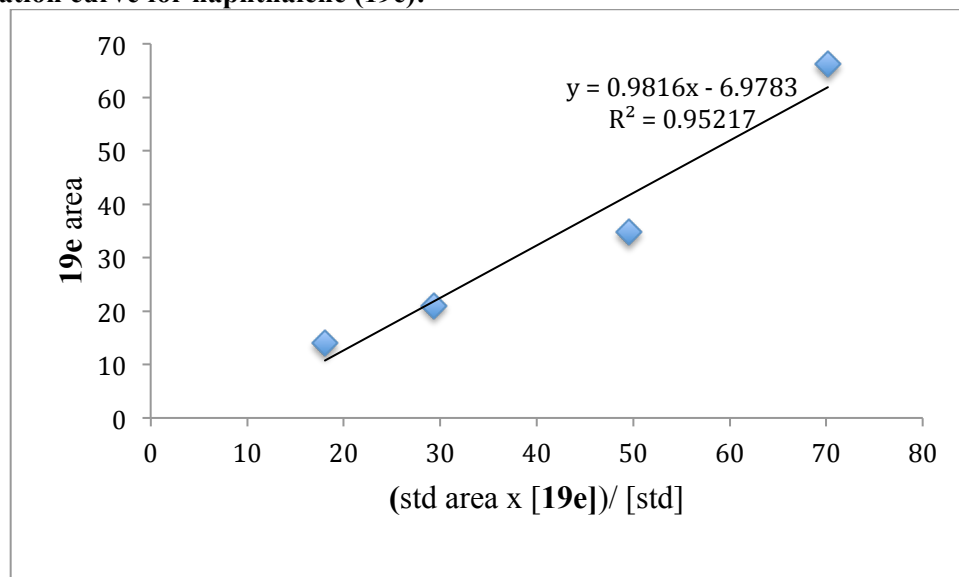

**Figure S7:** Plot of **19e** area versus (std area x [**19e**]) / [std] fitted to  $y = mx + b$  where  $m = 0.9816$  and  $b = -6.9783$  with a  $R^2$  of 0.95217.

| mmol 19e    | mmol tridecane | Area IS    | Area Pdt.  |
|-------------|----------------|------------|------------|
| 0.049153468 | 0.16403        | 5560584759 | 1352944750 |
| 0.103768433 | 0.16403        | 7185032978 | 3353404616 |
| 0.154482328 | 0.16403        | 6904005775 | 4614671198 |
| 0.201295155 | 0.16403        | 6790282011 | 6296395603 |

**Calibration curve for *t*-butylbenzene (19f):**

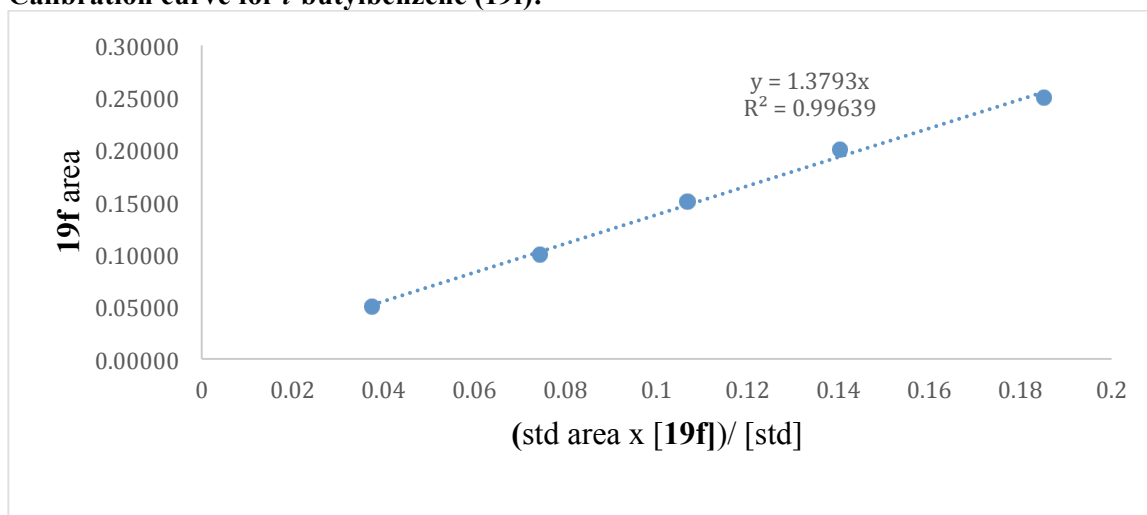

**Figure S8:** Plot of **19f** area versus (std area x [19f]) / [std] fitted to  $y = mx + b$  where  $m = 1.3793$  and  $b = 0$  with a  $R^2$  of 0.99639.

| mmol 19f    | mmol tridecane | Area IS    | Area Pdt.  |
|-------------|----------------|------------|------------|
| 0.049738489 | 0.16403        | 2518295474 | 574090525  |
| 0.100122932 | 0.16403        | 3255077022 | 1477595029 |
| 0.149861422 | 0.16403        | 3930989531 | 2559730260 |
| 0.200245865 | 0.16403        | 3546712147 | 3032026099 |
| 0.249984354 | 0.16403        | 3479578042 | 3925217274 |



**Calibration curve for *p*-xylene (19g)**

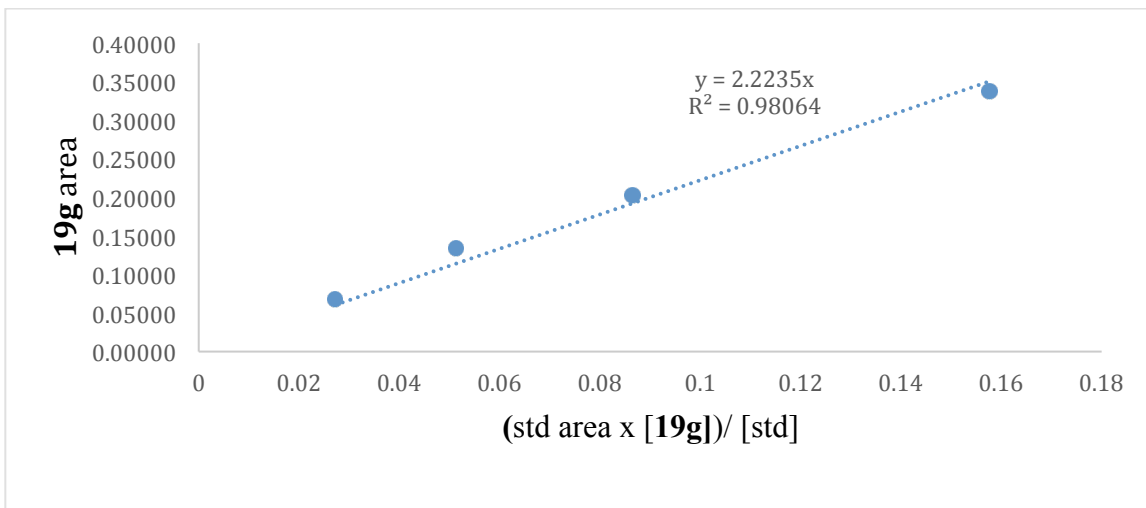

**Figure S9:** Plot of **19g** area versus (std area x [**19g**]) / [std] fitted to  $y = mx + b$  where  $m = 2.2235$  and  $b = 0$  with a  $R^2$  of 0.98064.

| mmol 19g    | mmol tridecane | Area IS    | Area Pdt.  |
|-------------|----------------|------------|------------|
| 0.067830908 | 0.164026904    | 3288937475 | 545232412  |
| 0.134567768 | 0.164026904    | 3669199995 | 1145416244 |
| 0.202398676 | 0.164026904    | 3546770818 | 1870406001 |
| 0.270229584 | 0.164026904    | 3601846681 | 2352337673 |
| 0.336966444 | 0.164026904    | 2666629964 | 2562696982 |

**Calibration curve for pyridine (19i):**

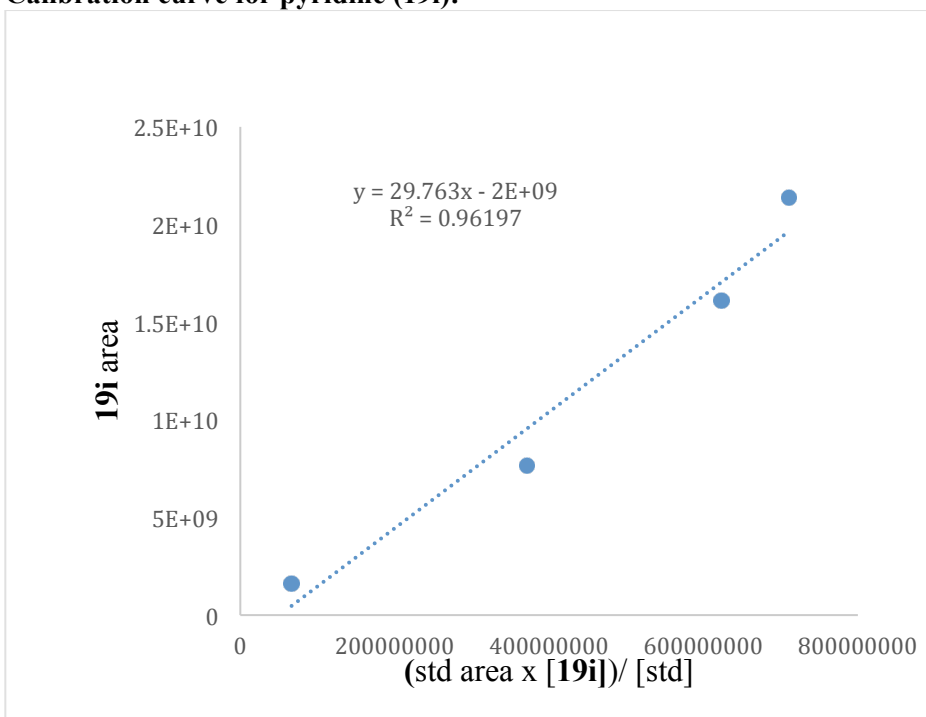

**Figure S10:** Plot of **19i** area versus (std area x [**19i**]) / [std] fitted to  $y = mx + b$  where  $m = 29.763$  and  $b = -2 \times 10^9$  with a  $R^2$  of 0.96197.

| mmol 19i    | mmol tridecane | Area IS    | Area Pdt. |
|-------------|----------------|------------|-----------|
| 0.062134632 | 0.164026904    | 4233992225 | 66403740  |
| 0.31067316  | 0.164026904    | 4031783804 | 371135414 |
| 0.62134632  | 0.164026904    | 4249091608 | 623374155 |
| 0.93201948  | 0.164026904    | 3760306370 | 710497433 |

## VI) Silylation Substrates

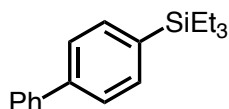

**2a**

[1,1'-biphenyl]-4-yltriethylsilane (**2a**)

The general procedure for silylation was followed using *N,N,N*-trimethylanilinium iodide **2** (73 mg, 0.215 mmol) and triethylsilane (160  $\mu$ L, 1 mmol). Purification by flash chromatography (100% hexanes) gave the title compound as a colorless oil in 86% yield (50 mg, 0.186 mmol). The spectral data matches that previously reported in the literature.<sup>[17]</sup>

**<sup>1</sup>H NMR** (401 MHz, Chloroform-*d*)  $\delta$  7.62 (m, 6H), 7.59 (d, *J* = 1.5 Hz, 2H), 7.45 (dd, *J* = 8.3, 6.9 Hz, 1H), 7.40 – 7.30 (m, 1H), 1.01 (t, *J* = 7.8 Hz, 9H), 0.84 (q, *J* = 7.3 Hz, 6H).

**<sup>13</sup>C NMR** (126 MHz, Chloroform-*d*)  $\delta$  141.56, 141.33, 136.38, 134.83, 128.88, 127.41, 127.27, 126.52, 7.60, 3.57.

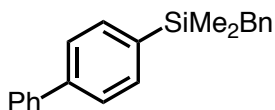

**2b**

[1,1'-biphenyl]-4-yl(benzyl)dimethylsilane (**2b**)

The general procedure for silylation was followed using *N,N,N*-trimethylanilinium iodide **2** (66 mg, 0.194 mmol) and dimethylbenzylsilane (160  $\mu$ L, 1 mmol). Purification by flash chromatography (100% hexanes to 98:2 hex/EtOAc) gave the title compound as a white solid in 85% yield (50 mg, 0.165 mmol). The spectral data matches that previously reported in the literature.<sup>[17]</sup>

**<sup>1</sup>H NMR** (400MHz, Chloroform-*d*)  $\delta$  7.68-7.57 (m, 4H), 7.54 (d, *J* = 8.0 Hz, 2H), 7.46 (dd, *J* = 8.3, 6.8 Hz, 2H), 7.4-7.33 (m, 1H), 7.20 (t, *J* = 7.5 Hz, 2H), 7.13-7.02 (m, 2H), 6.98 (d, *J* = 7.3 Hz, 2H), 2.35 (s, 2H), 0.29 (s, 6H).

**<sup>13</sup>C NMR** (100 MHz, Chloroform-*d*)  $\delta$  141.92, 141.18, 139.76, 137.37, 134.36, 128.92, 128.28, 128.13, 127.54, 127.29, 126.58, 124.25, 26.35, -3.24.

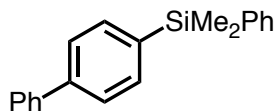

**2c**

[1,1'-biphenyl]-4-yl(dimethylphenyl)silane (**2c**)

The general procedure for silylation was followed using *N,N,N*-trimethylanilinium iodide **2** (73 mg, 0.215 mmol), 30 mg of 4Å molecular sieves powder, IPr\*OMe free carbene (9.4 mg, 0.1 equiv, 0.01 mmol), and dimethylphenylsilane (156  $\mu$ L, 1 mmol). Purification by flash

chromatography (100% hexanes) gave the title compound in an inseparable mixture with phenyldimethyldisilane as a colorless oil. 65% yield (41 mg, 0.14 mmol) by NMR analysis. The spectral data matches that previously reported in the literature.<sup>[18]</sup>

**<sup>1</sup>H NMR** (500MHz, Chloroform-*d*)  $\delta$  7.65-7.53 (m, 8H), 7.45 (t, *J*= 7.7 Hz, 2H), 7.41-7.32 (m, 4H), 0.60 (s, 6H).

**<sup>13</sup>C NMR** (126 MHz, Chloroform-*d*)  $\delta$  142.01, 141.20, 138.30, 137.13, 134.81, 134.33, 129.29, 128.90, 127.99, 127.53, 127.31, 126.70, 32.22, -2.19.

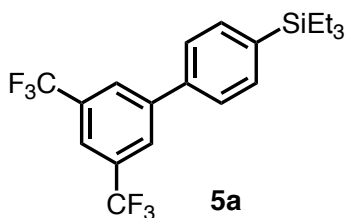

(3',5'-bis(trifluoromethyl)-[1,1'-biphenyl]-4-yl)triethylsilane (**5a**)

The general procedure for silylation was followed using *N,N,N*-trimethylanilinium iodide **5** (45.7 mg, 0.100 mmol) and triethylsilane (80  $\mu$ L, 1 mmol). Yield determined by NMR of the crude reaction mixture using fluorobenzene as an internal standard (98%). The spectral data matches that previously reported in the literature.<sup>[19]</sup>

**<sup>1</sup>H NMR** (500MHz, Chloroform-*d*)  $\delta$  8.02 (d, *J*=1.6Hz, 2H), 7.85 (s, 1H), 7.63 (d, *J*=8.1Hz, 2H), 7.59 (d, *J*=8.1Hz, 2H), 0.99 (t, *J*= 7.8 Hz, 9H), 0.84 (q, *J*=7.8 Hz, 6H).

**<sup>13</sup>C NMR** (176 MHz, Chloroform-*d*)  $\delta$  143.51, 138.79, 138.52, 132.23 (q, *J*= 33.3Hz), 127.35, 126.55, 123.55 (q, *J*= 272.8Hz), 121.04 (m), 7.52, 3.46.

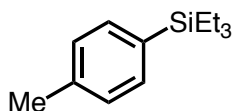

triethyl(*p*-tolyl)silane (**6a**)

The general procedure for silylation was followed using *N,N,N*-trimethylanilinium iodide **6** (54 mg, 0.195 mmol) and triethylsilane (160  $\mu$ L, 1 mmol). Yield determined by NMR of the crude reaction mixture using CH<sub>2</sub>Br<sub>2</sub> as an internal standard (90%). The spectral data matches that previously reported in the literature.<sup>[19]</sup>

**<sup>1</sup>H NMR** (400MHz, Chloroform-*d*)  $\delta$  7.39 (d, *J*= 7.9 Hz, 2H), 7.17 (d, *J*= 7.5 Hz, 2H), 2.35 (s, 3H), 0.96 (t, *J*= 7.7 Hz, 9H), 0.77 (q, *J*=7.6 Hz, 6H).

**<sup>13</sup>C NMR** (126 MHz, Chloroform-*d*)  $\delta$  138.62, 134.38, 133.38, 128.67, 7.58, 3.56.

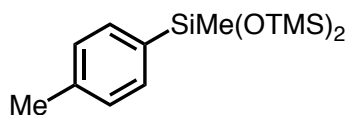

**6b**

1,1,1,3,5,5,5-heptamethyl-3-(*p*-tolyl)trisiloxane (**6b**)

The general procedure for silylation was followed using *N,N,N*-trimethylanilinium iodide **6** (57 mg, 0.206 mmol) and 1,1,1, 3, 5, 5, 5-heptamethyltrisiloxane (272  $\mu$ L, 1 mmol). Yield determined by NMR of the crude reaction mixture using  $\text{CH}_2\text{Br}_2$  as an internal standard (81%).

**$^1\text{H}$  NMR** (400MHz, Chloroform-*d*)  $\delta$  7.44 (d,  $J$ = 7.8 Hz), 2H), 7.17 (d,  $J$ = 7.5 Hz, 2H), 2.35 (s, 3H), 0.25 (s, 3H), 0.10 (s, 18H).

**$^{13}\text{C}$  NMR** (100 MHz, Chloroform-*d*)  $\delta$  139.36, 135.17, 133.43, 128.54, 21.70, 2.03, 0.28.

**HRMS** (EI) ( $m/z$ ): [M] calculated for  $\text{C}_{14}\text{H}_{28}\text{O}_2\text{Si}_3$ , 312.1397, found, 312.1409.

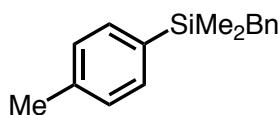

**6c**

benzyldimethyl(*p*-tolyl)silane (**6c**)

The general procedure for silylation was followed using *N,N,N*-trimethylanilinium iodide **6** (28 mg, 0.101 mmol) and dimethybenzylsilane (80  $\mu$ L, 0.5 mmol). Yield determined by NMR of the crude reaction mixture using  $\text{CH}_2\text{Br}_2$  as an internal standard (79%).

**$^1\text{H}$  NMR** (400 MHz, Chloroform-*d*)  $\delta$  7.38 (d,  $J$  = 7.6 Hz, 2H), 7.19 (d,  $J$  = 7.3 Hz, 4H), 7.08 (t,  $J$  = 7.3 Hz, 1H), 7.03 – 6.91 (m, 2H), 2.38 (s, 3H), 2.31 (s, 2H), 0.24 (s, 5H).

**$^{13}\text{C}$  NMR** (126 MHz, Chloroform-*d*)  $\delta$  139.94, 139.03, 134.96, 133.89, 128.71, 128.45, 128.22, 124.16, 26.42, 21.62, -3.22.

**HRMS** (EI) ( $m/z$ ): [M] calculated for  $\text{C}_{16}\text{H}_{20}\text{Si}$ , 240.1334, found, 240.1343.

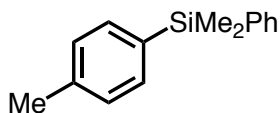

**6d**

dimethyl(phenyl)(*p*-tolyl)silane (**6d**)

The general procedure for silylation was followed using *N,N,N*-trimethylanilinium iodide **6** (56 mg, 0.202 mmol) and dimethylphenylsilane (156  $\mu$ L, 1 mmol). Yield determined by NMR of the crude reaction mixture using  $\text{CH}_2\text{Br}_2$  as an internal standard (74%). The spectral data matches that previously reported in the literature.<sup>[18]</sup>

**<sup>1</sup>H NMR** (400 MHz, Chloroform-*d*)  $\delta$  7.54 (dt,  $J$  = 4.7, 2.3 Hz, 2H), 7.44 (d,  $J$  = 7.5 Hz, 2H), 7.42 – 7.31 (m, 3H), 7.20 (d,  $J$  = 7.5 Hz, 2H), 2.37 (s, 3H), 0.56 (s, 6H).  
**<sup>13</sup>C NMR** (126 MHz, Chloroform-*d*)  $\delta$  134.38, 134.32, 134.30, 129.23, 129.15, 128.80, 127.94, 127.91, 21.62, -2.16.

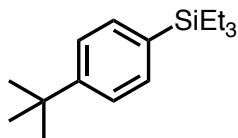

**7a**

(4-(*tert*-butyl)phenyl)triethylsilane (**7a**)

The general procedure for silylation was followed using *N,N,N*-trimethylanilinium iodide **7** (62 mg, 0.194 mmol) and triethylsilane (160  $\mu$ L, 1 mmol). Purification by flash chromatography (100% hexanes) gave the title compound as a colorless oil in 76% yield (37 mg, 0.149 mmol). The spectral data matches that previously reported in the literature.<sup>[17]</sup>

**<sup>1</sup>H NMR** (500 MHz, Chloroform-*d*)  $\delta$  7.43 (d,  $J$  = 8.2 Hz, 2H), 7.37 (d,  $J$  = 6.5 Hz, 2H), 1.32 (s, 9H), 0.97 (t,  $J$  = 7.8 Hz, 9H), 0.78 (q,  $J$  = 8.0 Hz, 6H).  
**<sup>13</sup>C NMR** (126 MHz, Chloroform-*d*)  $\delta$  151.64, 134.19, 133.97, 124.74, 34.74, 31.42, 7.63, 3.61.

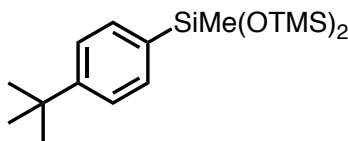

**7b**

3-(4-(*tert*-butyl)phenyl)-1,1,1,3,5,5,5-heptamethyltrisiloxane (**7b**)

The general procedure for silylation was followed using *N,N,N*-trimethylanilinium iodide **7** (68 mg, 0.213 mmol) and 1,1,1, 3, 5, 5, 5-heptamethyltrisiloxane (272  $\mu$ L, 1 mmol). Purification by flash chromatography (100% hexanes) gave the title compound as a colorless oil in 46% yield (34 mg, 0.096 mmol).

**<sup>1</sup>H NMR** (500 MHz, Chloroform-*d*)  $\delta$  7.50 (d,  $J$  = 7.5 Hz, 2H), 7.38 (d,  $J$  = 7.6 Hz, 2H), 1.33 (s, 9H), 0.26 (s, 3H), 0.12 (s, 18H).  
**<sup>13</sup>C NMR** (126 MHz, Chloroform-*d*)  $\delta$  152.43, 135.16, 133.83, 133.27, 124.65, 34.82, 31.41, 2.04, 0.41.

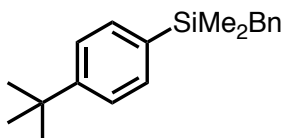

**7c**

benzyl(4-(*tert*-butyl)phenyl)dimethylsilane (**7c**)

The general procedure for silylation was followed using *N,N,N*-trimethylanilinium iodide **7** (64 mg, 0.200 mmol) and dimethybenzylsilane (160  $\mu$ L, 1 mmol). Purification by flash chromatography (100% hexanes) gave the title compound as a white solid in 41% yield (23 mg, 0.081 mmol).

**<sup>1</sup>H NMR** (500 MHz, Chloroform-*d*)  $\delta$  7.42 (d, *J* = 8.0 Hz, 2H), 7.38 (d, *J* = 8.1 Hz, 2H), 7.19 (t, *J* = 7.5 Hz, 2H), 7.07 (t, *J* = 7.3 Hz, 1H), 6.97 (d, *J* = 7.0 Hz, 2H), 2.30 (s, 2H), 1.33 (s, 9H), 0.22 (s, 6H).

**<sup>13</sup>C NMR** (126 MHz, Chloroform-*d*)  $\delta$  152.16, 140.01, 135.15, 133.73, 128.47, 128.24, 124.85, 124.16, 34.80, 31.40, 26.36, -3.23.

**HRMS** (EI) (*m/z*): [*M*] calculated for C<sub>19</sub>H<sub>26</sub>Si, 282.1804, found, 282.1814.

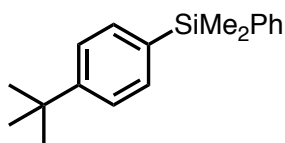

**7d**

(4-(*tert*-butyl)phenyl)dimethyl(phenyl)silane (**7d**)

The general procedure for silylation was followed using *N,N,N*-trimethylanilinium iodide **7** (67 mg, 0.210 mmol) and dimethyphenylsilane (156  $\mu$ L, 1 mmol). Purification by flash chromatography (100% hexanes) gave the title compound as a white solid in 93% yield (53 mg, 0.198 mmol). The spectral data matches that previously reported in the literature.<sup>[18]</sup>

**<sup>1</sup>H NMR** (401 MHz, Chloroform-*d*)  $\delta$  7.53 (ddd, *J* = 7.5, 4.9, 2.3 Hz, 2H), 7.47 (d, *J* = 8.2 Hz, 2H), 7.38 (d, *J* = 8.2 Hz, 2H), 7.36 (dd, *J* = 4.7, 2.7 Hz, 3H), 1.32 (s, 9H), 0.54 (s, 6H).

**<sup>13</sup>C NMR** (126 MHz, Chloroform-*d*)  $\delta$  152.15, 138.65, 134.76, 134.31, 134.20, 129.14, 127.90, 124.92, 34.79, 31.39, -2.18.

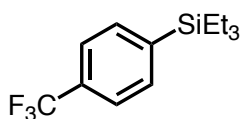

**8a**

triethyl(4-(trifluoromethyl)phenyl)silane (**8a**)

The general procedure for silylation was followed using *N,N,N*-trimethylanilinium iodide **8** (68 mg, 0.205 mmol) and triethylsilane (160  $\mu$ L, 1 mmol). Yield determined by NMR of the crude reaction mixture using fluorobenzene as an internal standard (50%). The spectral data matches that previously reported in the literature.<sup>[20]</sup>

**<sup>1</sup>H NMR** (401 MHz, Chloroform-*d*)  $\delta$  7.60 (d, *J* = 8.5 Hz, 2H), 7.58 (d, *J* = 8.4 Hz, 2H), 0.96 (t, *J* = 7.7 Hz, 9H), 0.81 (q, *J* = 7.7 Hz, 6H).

**<sup>13</sup>C NMR** (126 MHz, Chloroform-*d*)  $\delta$  155.84, 142.74, 134.56, 130.82 (q, *J* = 31.8 Hz), 124.28 (q, *J* = 3.7 Hz), 7.43, 3.32.

**<sup>19</sup>F NMR** (377 MHz, Chloroform-*d*)  $\delta$  -62.91.

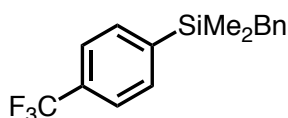

**8b**

benzyldimethyl(4-(trifluoromethyl)phenyl)silane (**8b**)

The general procedure for silylation was followed using *N,N,N*-trimethylanilinium iodide **8** (66 mg, 0.199 mmol) and dimethybenzylsilane (63  $\mu$ L, 0.4 mmol). Yield determined by NMR of the crude reaction mixture using fluorobenzene as an internal standard (52%). Purification by preparative TLC (100% hexanes) gave the title compound as a clear oil.

**$^1\text{H}$  NMR** (500 MHz, Chloroform-*d*)  $\delta$  7.58 (d,  $J$  = 7.8 Hz, 2H), 7.55 (d,  $J$  = 7.9 Hz, 2H), 7.19 (t,  $J$  = 7.4 Hz, 2H), 7.08 (t,  $J$  = 7.4 Hz, 1H), 6.92 (d,  $J$  = 7.6 Hz, 2H), 2.32 (s, 2H), 0.29 (s, 6H).

**$^{13}\text{C}$  NMR** (126 MHz, Chloroform-*d*)  $\delta$  143.57, 139.11, 134.14, 131.02, 128.41, 128.37, 124.48, 124.34 (q,  $J$  = 3.8 Hz), 26.00, -3.42.

**$^{19}\text{F}$  NMR** (471 MHz, Chloroform-*d*)  $\delta$  -62.92.

**HRMS** (EI) ( $m/z$ ): [M] calculated for  $\text{C}_{16}\text{H}_{17}\text{F}_3\text{Si}$ , 294.1052, found, 294.1062.

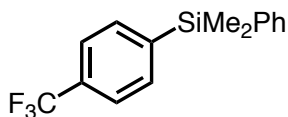

**8c**

dimethyl(phenyl)(4-(trifluoromethyl)phenyl)silane (**8c**)

The general procedure for silylation was followed using *N,N,N*-trimethylanilinium iodide **8** (65 mg, 0.196 mmol) and dimethylphenylsilane (62  $\mu$ L, 0.4 mmol). Yield determined by NMR of the crude reaction mixture using fluorobenzene as an internal standard (47%). Purification by preparative TLC (100% hexanes) gave the title compound as a clear oil. The spectral data matches that previously reported in the literature.<sup>[18]</sup>

**$^1\text{H}$  NMR** (401 MHz, Chloroform-*d*)  $\delta$  7.64 (d,  $J$  = 7.9 Hz, 1H), 7.59 (d,  $J$  = 7.9 Hz, 1H), 7.55 – 7.48 (m, 1H), 7.45 – 7.33 (m, 1H), 0.59 (s, 3H).

**$^{13}\text{C}$  NMR** (126 MHz, Chloroform-*d*)  $\delta$  143.54, 137.21, 134.57, 134.26, 131.19 (d,  $J$  = 32.4 Hz), 129.61, 128.14, 124.45 (q,  $J$  = 3.7 Hz), -2.45.

**$^{19}\text{F}$  NMR** (471 MHz, Chloroform-*d*)  $\delta$  -62.95.

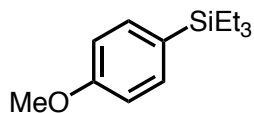

**9a**

triethyl(4-methoxyphenyl)silane (**9a**)

The general procedure for silylation was followed using *N,N,N*-trimethylanilinium iodide **9** (58 mg, 0.198 mmol) and triethylsilane (160  $\mu$ L, 1 mmol). Yield determined by NMR of the crude



reaction mixture using CH<sub>2</sub>Br<sub>2</sub> as an internal standard (98%). The spectral data matches that previously reported in the literature.<sup>[21]</sup>

**<sup>1</sup>H NMR** (500MHz, Chloroform-*d*) δ 7.42 (d, *J*= 8.6 Hz, 2H), 6.91(d, *J*= 8.6 Hz, 2H), 3.81 (s, 3H), 0.96 (t, *J*= 7.9 Hz, 9H), 0.76 (q, *J*= 7.9 Hz, 6H).

**<sup>13</sup>C NMR** (100 MHz, Chloroform-*d*) δ 160.30, 135.70, 128.28, 113.59, 55.11, 7.34, 3.65.

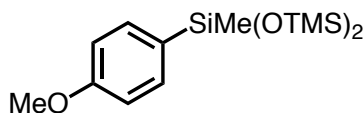

**9b**

3-(4-methoxyphenyl)-1,1,1,3,5,5,5-heptamethyltrisiloxane (**9b**)

The general procedure for silylation was followed using *N,N,N*-trimethylanilinium iodide **9** (29 mg, 0.096 mmol) and 1,1,1, 3, 5, 5, 5-heptamethyltrisiloxane (136 μL, 0.5 mmol). Yield determined by NMR of the crude reaction mixture using CH<sub>2</sub>Br<sub>2</sub> as an internal standard (59%). The spectral data matches that previously reported in the literature.<sup>[22]</sup>

**<sup>1</sup>H NMR** (500 MHz, Chloroform-*d*) δ 7.48 (d, *J* = 8.5 Hz, 2H), 6.90 (d, *J* = 8.5 Hz, 2H), 3.82 (s, 3H), 0.25 (s, 3H), 0.10 (s, 18H).

**<sup>13</sup>C NMR** (126 MHz, Chloroform-*d*) δ 160.79, 134.91, 129.96, 113.42, 55.13, 2.02, 0.33.

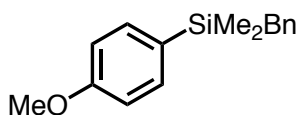

**9c**

benzyl(4-methoxyphenyl)dimethylsilane (**9c**)

The general procedure for silylation was followed using *N,N,N*-trimethylanilinium iodide **9** (58 mg, 0.198 mmol) and dimethylbenzylsilane (160 μL, 1 mmol). Yield determined by NMR of the crude reaction mixture using CH<sub>2</sub>Br<sub>2</sub> as an internal standard (98%).

**<sup>1</sup>H NMR** (400 MHz, Chloroform-*d*) δ 7.42 – 7.33 (m, 2H), 7.23 – 7.14 (m, 2H), 7.12 – 7.04 (m, 1H), 7.00 – 6.88 (m, 3H), 3.83 (s, 3H), 2.29 (s, 2H), 0.24 (s, 6H).

**<sup>13</sup>C NMR** (100 MHz, Chloroform-*d*) δ 160.57, 139.96, 135.29, 129.39, 128.44, 128.20, 124.14, 113.63, 55.16, 26.61, -3.12.

**HRMS** (ESI) (*m/z*): [*M*+Na] calculated for C<sub>16</sub>H<sub>20</sub>OSi, 279.1176, found, 279.1179.

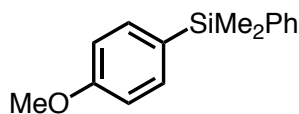

**9d**

(4-methoxyphenyl)dimethyl(phenyl)silane (**9d**)

The general procedure for silylation was followed using *N,N,N*-trimethylanilinium iodide **9** (58 mg, 0.198 mmol) and dimethyphenylsilane (156  $\mu$ L, 1 mmol). Yield determined by NMR of the crude reaction mixture using  $\text{CH}_2\text{Br}_2$  as an internal standard (92%). The spectral data matches that previously reported in the literature.<sup>[18]</sup>

**$^1\text{H}$  NMR** (500 MHz, Chloroform-*d*)  $\delta$  7.58 – 7.51 (m, 2H), 7.48 (d,  $J$  = 8.0 Hz, 2H), 7.37 (m,  $J$  = 5.8 Hz, 3H), 6.94 (d,  $J$  = 8.0 Hz, 2H), 3.83 (s, 3H), 0.56 (s, 6H).

**$^{13}\text{C}$  NMR** (126 MHz, Chloroform-*d*)  $\delta$  160.63, 138.82, 135.78, 134.27, 129.13, 127.91, 113.74, 55.16, -2.04.

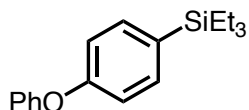

**10a**

triethyl(4-phenoxyphenyl)silane (**10a**)

The general procedure for silylation was followed using *N,N,N*-trimethylanilinium iodide **10** (70 mg, 0.197 mmol) and triethylsilane (160  $\mu$ L, 1 mmol). Purification by flash chromatography (100% hexanes) gave the title compound as a colorless oil in 89% yield (50 mg, 0.176 mmol).

**$^1\text{H}$  NMR** (500 MHz, Chloroform-*d*)  $\delta$  7.44 (d,  $J$  = 7.4 Hz, 2H), 7.39 – 7.31 (m, 2H), 7.11 (t,  $J$  = 7.4 Hz, 1H), 7.04 (d,  $J$  = 8.7 Hz, 2H), 6.98 (d,  $J$  = 7.4 Hz, 2H), 0.97 (t,  $J$  = 7.9 Hz, 9H), 0.78 (q,  $J$  = 7.9 Hz, 6H).

**$^{13}\text{C}$  NMR** (126 MHz, Chloroform-*d*)  $\delta$  158.24, 156.98, 135.85, 129.86, 123.53, 119.43, 119.02, 118.01, 7.56, 3.63.

**HRMS** (EI) (m/z): [M] calculated for  $\text{C}_{18}\text{H}_{24}\text{OSi}$ , 284.1596, found, 284.1609.

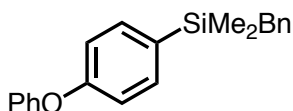

**10b**

benzyldimethyl(4-phenoxyphenyl)silane (**10b**)

The general procedure for silylation was followed using *N,N,N*-trimethylanilinium iodide **10** (73 mg, 0.206 mmol) and dimethylbenzylsilane (64  $\mu$ L, 0.4 mmol). Purification by flash chromatography (100% hexanes) gave the title compound as a white solid in 72% yield (47 mg, 0.148 mmol).

**$^1\text{H}$  NMR** (500 MHz, Chloroform-*d*)  $\delta$  7.42 (d,  $J$  = 7.2 Hz, 2H), 7.37 (t,  $J$  = 8.1 Hz, 2H), 7.20 (t,  $J$  = 6.6 Hz, 2H), 7.15 (t,  $J$  = 7.9 Hz, 1H), 7.09 (d,  $J$  = 6.9 Hz, 1H), 7.05 (d,  $J$  = 7.8 Hz, 2H), 7.00 (d,  $J$  = 6.6 Hz, 2H), 6.96 (d,  $J$  = 7.1 Hz, 2H), 2.31 (s, 3H), 0.27 (s, 1H).

**$^{13}\text{C}$  NMR** (126 MHz, Chloroform-*d*)  $\delta$  158.46, 156.95, 139.77, 135.46, 132.53, 129.90, 128.44, 128.24, 124.22, 123.59, 119.37, 118.10, 26.50, -3.16.

**HRMS** (ESI) (m/z): [M+Na] calculated for  $\text{C}_{21}\text{H}_{22}\text{OSi}$ , 341.1332, found, 341.1338.

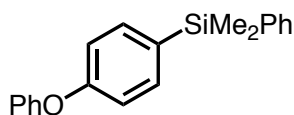

**10c**

dimethyl(4-phenoxyphenyl)(phenyl)silane (**10c**)

The general procedure for silylation was followed using *N,N,N*-trimethylanilinium iodide **10** (70 mg, 0.197 mmol), 30 mg of 4Å molecular sieves powder, IPr\*OMe free carbene (9.4 mg, 0.1 equiv, 0.01 mmol), and dimethylphenylsilane (156 µL, 1 mmol). Purification by flash chromatography (100% hexanes) gave the title compound in an inseparable mixture with phenyldimethyldisilane as a colorless oil. 68% yield (41 mg, 0.1348 mmol) by NMR analysis.

**<sup>1</sup>H NMR** (401 MHz, Chloroform-*d*) δ 7.53 (ddd, *J* = 7.4, 5.1, 2.1 Hz, 3H), 7.47 (d, *J* = 8.1 Hz, 2H), 7.41 – 7.30 (m, 5H), 7.12 (t, *J* = 7.4 Hz, 1H), 7.03 (d, *J* = 8.1 Hz, 2H), 6.98 (d, *J* = 8.4 Hz, 2H), 0.54 (s, 6H).

**<sup>13</sup>C NMR** (126 MHz, Chloroform-*d*) δ 158.60, 156.84, 138.44, 135.93, 134.27, 132.24, 129.89, 129.25, 127.97, 123.65, 119.49, 118.08, -2.09.

**HRMS** (EI) (*m/z*): [*M*] calculated for C<sub>20</sub>H<sub>20</sub>OSi, 304.1283, found, 304.1294.

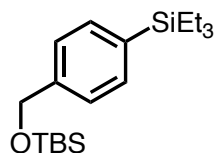

**11a**

*tert*-butyldimethyl((4-(triethylsilyl)benzyl)oxy)silane (**11a**)

The general procedure for silylation was followed using *N,N,N*-trimethylanilinium iodide **11** (80 mg, 0.196 mmol), 30 mg of 4Å molecular sieves powder, IPr\*OMe free carbene (18.8 mg, 0.1 equiv, 0.01 mmol), triethylsilane (160 µL, 1 mmol). Purification by flash chromatography (100% hexanes) gave the title compound as a yellow solid in 46% yield (31 mg, 0.091 mmol).

**<sup>1</sup>H NMR** (401 MHz, Chloroform-*d*) δ 7.46 (d, *J* = 7.6 Hz, 2H), 7.31 (d, *J* = 7.5 Hz, 2H), 4.74 (s, 2H), 0.96 (t, *J* = 7.8 Hz, 9H), 0.95 (s, 9H), 0.78 (q, *J* = 7.8 Hz, 6H), 0.10 (s, 3H).

**<sup>13</sup>C NMR** (100 MHz, Chloroform-*d*) δ 142.05, 135.80, 134.29, 125.46, 65.08, 26.13, 18.60, 7.56, 3.54, -5.11.

**HRMS** (ESI) (*m/z*): [*M*+Na] calculated for C<sub>19</sub>H<sub>36</sub>OSi<sub>2</sub>, 359.2197, found, 359.2197.

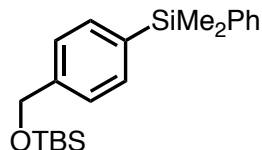

**11b**

*tert*-butyl((4-(dimethyl(phenyl)silyl)benzyl)oxy)dimethylsilane (**11b**)

The general procedure for silylation was followed using *N,N,N*-trimethylanilinium iodide **11** (81 mg, 0.199 mmol), 30 mg of 4Å molecular sieves powder, IPr\*OMe free carbene (9.4 mg, 0.1 equiv, 0.01 mmol), and dimethyphenylsilane (156 µL, 1 mmol). Purification by flash chromatography (100% hexanes) gave the title compound as an off white solid in 57% yield (40 mg, 0.113 mmol).

**<sup>1</sup>H NMR** (400 MHz, Chloroform-*d*) δ 7.51 (dd, *J* = 3.0, 1.6 Hz, 2H), 7.49 (d, *J* = 8.6 Hz, 2H), 7.34 (m, 3H), 7.31 (d, *J* = 7.7 Hz, 2H), 4.74 (s, 2H), 0.94 (s, 9H), 0.54 (s, 6H), 0.10 (s, 6H).

**<sup>13</sup>C NMR** (126 MHz, Chloroform-*d*) δ 142.57, 138.54, 136.60, 134.31, 134.29, 129.18, 127.92, 125.57, 65.01, 26.12, 18.59, -2.18, -5.11.

**HRMS** (ESI) (*m/z*): [*M*+Na] calculated for C<sub>21</sub>H<sub>32</sub>OSi<sub>2</sub>, 379.1884, found, 379.1895.

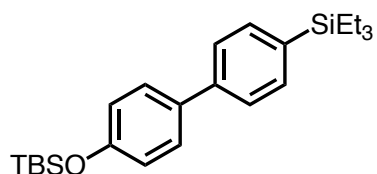

**12a**

*tert*-butyldimethyl((4'-(triethylsilyl)-[1,1'-biphenyl]-4-yl)oxy)silane (**12a**)

The general procedure for silylation was followed using *N,N,N*-trimethylanilinium iodide **12** (97 mg, 0.207 mmol) and triethylsilane (160 µL, 1 mmol). Purification by flash chromatography (100% hexanes) gave the title compound as a colorless oil in 56% yield (46 mg, 0.115 mmol).

**<sup>1</sup>H NMR** (400 MHz, Chloroform-*d*) δ 7.54 (m, 4H), 7.48 (d, *J* = 8.6 Hz, 2H), 6.90 (d, *J* = 8.6 Hz, 2H), 1.00 (s, 9), 0.82 (q, *J* = 7.4 Hz, 6H), 0.23 (s, 6H).

**<sup>13</sup>C NMR** (100 MHz, Chloroform-*d*) δ 155.46, 141.23, 135.52, 134.78, 134.37, 128.19, 126.10, 120.47, 25.86, 18.40, 7.60, 3.59, -4.21.

**HRMS** (EI) (*m/z*): [*M*] calculated for C<sub>24</sub>H<sub>38</sub>OSi<sub>2</sub>, 398.2461, found, 398.2473.

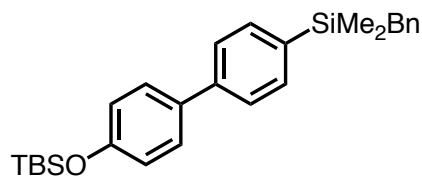

**12b**

benzyl(4'-((*tert*-butyldimethylsilyl)oxy)-[1,1'-biphenyl]-4-yl)dimethylsilane (**12b**)

The general procedure for silylation was followed using *N,N,N*-trimethylanilinium iodide **12** (251 mg, 0.535 mmol) and dimethylbenzylsilane (421 µL, 2.66 mmol). Purification by flash chromatography (100% hexanes to 98:2 hexanes/EtOAc) gave the title compound as a colorless oil in 76% yield (175 mg, 0.404 mmol).

**<sup>1</sup>H NMR** (400 MHz, Chloroform-*d*) δ 7.54 (d, *J* = 7.7 Hz, 2H), 7.52 – 7.44 (m, 4H), 7.19 (t, *J* = 7.5 Hz, 2H), 7.07 (t, *J* = 7.3 Hz, 1H), 6.96 (d, *J* = 7.6 Hz, 2H), 6.91 (d, *J* = 8.3 Hz, 2H), 2.33 (s, 2H), 1.01 (s, 9H), 0.27 (s, 6H), 0.23 (s, 6H).

**<sup>13</sup>C NMR** (126 MHz, Chloroform-*d*) δ 155.57, 141.61, 139.83, 136.55, 134.32, 134.21, 128.48, 128.27, 128.23, 126.16, 124.22, 120.50, 26.40, 25.86, -3.22, -4.21.

**HRMS** (ESI) (m/z): [M+Na] calculated for C<sub>27</sub>H<sub>36</sub>OSi<sub>2</sub>, 455.2197, found, 455.2200.

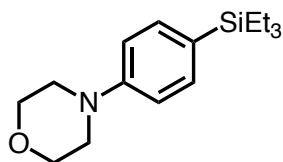

**13a**

4-(4-(triethylsilyl)phenyl)morpholine (**13a**)

The general procedure for silylation was followed using *N,N,N*-trimethylanilinium iodide **13** (73 mg, 0.210 mmol) and triethylsilane (160  $\mu$ L, 1 mmol). Purification by flash chromatography (95:5 hexanes/EtOAc) gave the title compound as a white solid in 86% yield (51 mg, 0.184 mmol).

**<sup>1</sup>H NMR** (500 MHz, Chloroform-*d*)  $\delta$  7.41 (d, *J* = 8.4 Hz, 2H), 6.91 (d, *J* = 8.6 Hz, 2H), 3.86 (dd, *J* = 5.8, 3.9 Hz, 4H), 3.20 (dd, *J* = 5.9, 3.8 Hz, 4H), 0.97 (t, *J* = 7.8 Hz, 9H), 0.77 (q, *J* = 7.6 Hz, 6H).

**<sup>13</sup>C NMR** (126 MHz, Chloroform-*d*)  $\delta$  151.55, 135.44, 127.01, 114.78, 67.08, 48.83, 7.59, 3.66.

**HRMS** (ESI) (m/z): [M+H] calculated for C<sub>16</sub>H<sub>27</sub>NOSi, 278.1940, found, 278.1936.

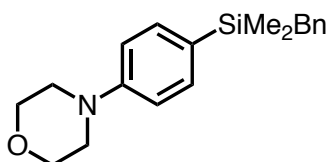

**13b**

4-(4-(benzyltrimethylsilyl)phenyl)morpholine (**13b**)

The general procedure for silylation was followed using *N,N,N*-trimethylanilinium iodide **13** (70 mg, 0.201 mmol) and dimethylbenzylsilane (160  $\mu$ L, 1 mmol). Purification by flash chromatography (95:5 to 90:10 hexanes/EtOAc) gave the title compound as a white solid in 76% yield (47 mg, 0.151 mmol).

**<sup>1</sup>H NMR** (500 MHz, Chloroform-*d*)  $\delta$  7.36 (d, *J* = 7.8 Hz, 2H), 7.18 (t, *J* = 7.5 Hz, 2H), 7.06 (t, *J* = 7.3 Hz, 1H), 6.94 (d, *J* = 7.6 Hz, 2H), 6.90 (d, *J* = 8.2 Hz, 2H), 3.89 – 3.84 (m, 4H), 3.20 (t, *J* = 4.9 Hz, 4H), 2.28 (s, 2H), 0.21 (s, 6H).

**<sup>13</sup>C NMR** (126 MHz, Chloroform-*d*)  $\delta$  151.86, 140.08, 135.01, 128.46, 128.19, 128.08, 124.10, 114.80, 67.04, 48.85, 26.61, -3.15.

**HRMS** (ESI) (m/z): [M+H] calculated for C<sub>19</sub>H<sub>25</sub>NOSi, 312.1784, found, 312.1786.

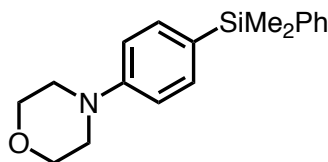

**13c**

#### 4-(4-(dimethyl(phenyl)silyl)phenyl)morpholine (**13c**)

The general procedure for silylation was followed using *N,N,N*-trimethylanilinium iodide **13** (67 mg, 0.198 mmol) and dimethyphenylsilane (156  $\mu$ L, 1 mmol). Purification by flash chromatography (95:5 hexanes/EtOAc) gave the title compound as a white solid in 78% yield (46 mg, 0.155 mmol).

**<sup>1</sup>H NMR** (500 MHz, Chloroform-*d*)  $\delta$  7.55 – 7.48 (m, 2H), 7.43 (d, *J* = 8.0 Hz, 2H), 7.34 (d, *J* = 6.2 Hz, 3H), 6.90 (d, *J* = 8.0 Hz, 2H), 3.85 (t, *J* = 4.6 Hz, 4H), 3.19 (t, *J* = 4.7 Hz, 4H), 0.52 (s, 6H).

**<sup>13</sup>C NMR** (126 MHz, Chloroform-*d*)  $\delta$  151.89, 138.99, 135.49, 134.28, 129.06, 127.86, 127.66, 114.84, 67.02, 48.77, -2.07.

**HRMS** (ESI) (*m/z*): [*M*+Na] calculated for C<sub>18</sub>H<sub>23</sub>NOSi, 298.1622, found, 298.1628.

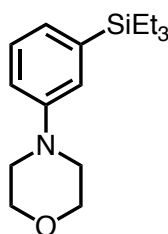

**14a**

#### 4-(3-(triethylsilyl)phenyl)morpholine (**14a**)

The general procedure for silylation was followed using *N,N,N*-trimethylanilinium iodide **14** (70 mg, 0.201 mmol) and triethylsilane (160  $\mu$ L, 1 mmol). Purification by flash chromatography (100% hexanes to 95:5 hexanes/EtOAc) gave the title compound as a white solid in 81% yield (45 mg, 0.162 mmol). The spectral data matches that previously reported in the literature.<sup>[17]</sup>

**<sup>1</sup>H NMR** (401 MHz, Chloroform-*d*)  $\delta$  7.29 (d, *J* = 7.7 Hz, 1H), 7.06 (d, *J* = 2.6 Hz, 1H), 7.03 (dd, *J* = 7.2, 1.1 Hz, 1H), 6.91 (dd, *J* = 8.2, 2.6 Hz, 1H), 3.92 – 3.84 (m, 4H), 3.17 (dd, *J* = 5.8, 3.8 Hz, 4H), 0.97 (t, *J* = 7.7 Hz, 9H), 0.79 (q, *J* = 7.8 Hz, 6H).

**<sup>13</sup>C NMR** (100 MHz, Chloroform-*d*)  $\delta$  150.71, 138.52, 128.61, 126.25, 121.76, 116.37, 67.17, 49.73, 7.61, 3.55.

**HRMS** (ESI) (*m/z*): [*M*+H] calculated for C<sub>18</sub>H<sub>23</sub>NOSiO, 298.1627, found, 298.1628.

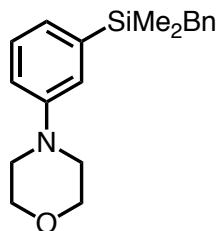

**14b**

#### 4-(3-(benzyl(dimethyl)silyl)phenyl)morpholine (**14b**)

The general procedure for silylation was followed using *N,N,N*-trimethylanilinium iodide **14** (69 mg, 0.198 mmol) and dimethylbenzylsilane (160  $\mu$ L, 1 mmol). Purification by flash

chromatography (95:5 hexanes/EtOAc) gave the title compound as a white solid in 85% yield (53 mg, 0.167 mmol).

**<sup>1</sup>H NMR** (400 MHz, Chloroform-*d*)  $\delta$  7.29 (d,  $J$  = 7.5 Hz, 1H), 7.23 – 7.13 (m, 2H), 7.06 (t,  $J$  = 7.2 Hz, 1H), 7.00 (d,  $J$  = 7.1 Hz, 1H), 6.98 – 6.88 (m, 4H), 3.90 – 3.82 (m, 4H), 3.16 – 3.10 (m, 4H), 2.29 (s, 2H), 0.24 (s, 6H).

**<sup>13</sup>C NMR** (100 MHz, Chloroform-*d*)  $\delta$  150.66, 139.88, 139.48, 128.73, 128.49, 128.24, 125.62, 121.32, 116.73, 67.13, 49.66, 26.38, -3.20.

**HRMS** (ESI) ( $m/z$ ): [M+H] calculated for C<sub>19</sub>H<sub>25</sub>NOSi, 312.1784, found, 312.1791.

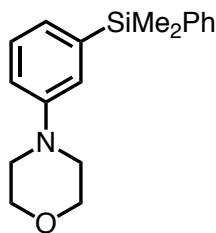

**14c**

4-(3-(dimethyl(phenyl)silyl)phenyl)morpholine (**14c**)

The general procedure for silylation was followed using *N,N,N*-trimethylanilinium iodide **14** (70 mg, 0.201 mmol) and dimethyphenylsilane (156  $\mu$ L, 1 mmol). Purification by flash chromatography (95:5 hexanes/EtOAc) gave the title compound as a white solid in 70% yield (42 mg, 0.141 mmol).

**<sup>1</sup>H NMR** (400 MHz, Chloroform-*d*)  $\delta$  7.56 – 7.49 (m, 2H), 7.40 – 7.32 (m, 3H), 7.29 (d,  $J$  = 7.6 Hz, 1H), 7.11 – 7.02 (m, 2H), 6.97 – 6.88 (m, 1H), 3.89 – 3.81 (m, 4H), 3.17 – 3.10 (m, 4H), 0.54 (s, 6H).

**<sup>13</sup>C NMR** (100 MHz, Chloroform-*d*)  $\delta$  150.78, 139.21, 138.42, 134.32, 129.21, 128.83, 127.92, 126.19, 121.65, 116.69, 67.12, 49.59, -2.17.

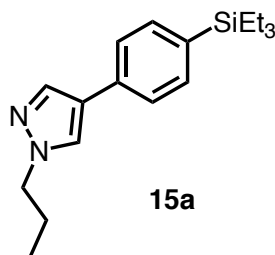

**15a**

1-propyl-4-(4-(triethylsilyl)phenyl)-1*H*-pyrazole (**15a**)

The general procedure for silylation was followed using *N,N,N*-trimethylanilinium iodide **15** (73 mg, 0.197 mmol) and triethylsilane (160  $\mu$ L, 1 mmol). Purification by flash chromatography (90:10 hexanes/EtOAc) gave the title compound as a white solid in 81% yield (48 mg, 0.160 mmol).

**<sup>1</sup>H NMR** (500 MHz, Chloroform-*d*)  $\delta$  7.80 (s, 1H), 7.64 (s, 1H), 7.49 (d,  $J$  = 8.1 Hz, 2H), 7.47 (d,  $J$  = 8.1 Hz, 2H), 4.11 (t,  $J$  = 7.0 Hz, 2H), 1.93 (h,  $J$  = 7.2 Hz, 2H), 0.98 (t,  $J$  = 7.8 Hz, 9H), 0.94

(t,  $J = 7.4$  Hz, 3H), 0.80 (q,  $J = 7.9$  Hz, 6H).

$^{13}\text{C}$  NMR (126 MHz, Chloroform- $d$ )  $\delta$  136.76, 135.23, 134.90, 133.19, 126.14, 124.87, 122.89, 54.20, 23.89, 11.30, 7.56, 3.53.

HRMS (ESI) ( $m/z$ ):  $[M+H]$  calculated for  $\text{C}_{18}\text{H}_{28}\text{N}_2\text{OSi}$ , 301.2100, found, 301.2092.

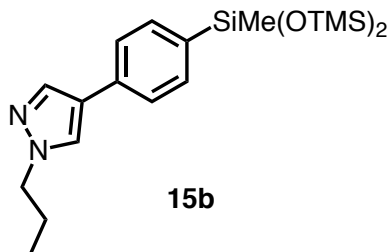

**15b**

4-(4-(1,1,1,3,5,5,5-heptamethyltrisiloxan-3-yl)phenyl)-1-propyl-1H-pyrazole (**15b**)

The general procedure for silylation was followed using *N,N,N*-trimethylanilinium iodide **15** (35 mg, 0.094 mmol) and 1,1,1, 3, 5, 5, 5-heptamethyltrisiloxane (136  $\mu\text{L}$ , 0.5 mmol). Purification by flash chromatography (90:10 to 80:20 hexanes/EtOAc) gave the title compound as a white solid in 27% yield (10 mg, 0.018 mmol).

$^1\text{H}$  NMR (500 MHz, Chloroform- $d$ )  $\delta$  7.80 (s, 1H), 7.65 (s, 1H), 7.54 (d,  $J = 7.8$  Hz, 2H), 7.47 (d,  $J = 7.8$  Hz, 2H), 4.11 (t,  $J = 7.1$  Hz, 2H), 1.93 (h,  $J = 7.3$  Hz, 2H), 0.95 (t,  $J = 7.4$  Hz, 3H), 0.27 (s, 3H), 0.11 (s, 18H).

$^{13}\text{C}$  NMR (126 MHz, Chloroform- $d$ )  $\delta$  136.80, 136.35, 133.96, 133.83, 126.19, 124.75, 122.86, 54.22, 23.90, 11.32, 2.03, 0.22.

HRMS (ESI) ( $m/z$ ):  $[M+H]$  calculated for  $\text{C}_{19}\text{H}_{34}\text{N}_2\text{O}_2\text{Si}_3$ , 407.2006, found, 407.2003.

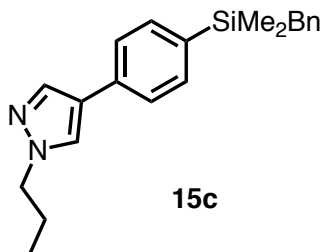

**15c**

4-(4-(benzyltrimethylsilyl)phenyl)-1-propyl-1H-pyrazole (**15c**)

The general procedure for silylation was followed using *N,N,N*-trimethylanilinium iodide **15** (36 mg, 0.097 mmol) and dimethylbenzylsilane (80  $\mu\text{L}$ , 0.5 mmol). Purification by flash chromatography (90:10 hexanes/EtOAc) gave the title compound as a white solid in 93% yield (30 mg, 0.090 mmol).

$^1\text{H}$  NMR (500 MHz, Chloroform- $d$ )  $\delta$  7.80 (s, 1H), 7.65 (s, 1H), 7.47 (d,  $J = 8.0$  Hz, 2H), 7.44 (d,  $J = 7.8$  Hz, 2H), 7.18 (t,  $J = 7.6$  Hz, 2H), 7.10 – 7.04 (m, 1H), 6.95 (d,  $J = 7.5$  Hz, 2H), 4.12 (t,  $J = 7.1$  Hz, 2H), 2.31 (s, 2H), 1.94 (q,  $J = 7.2$  Hz, 2H), 0.96 (dd,  $J = 7.9, 6.8$  Hz, 3H), 0.26 (s, 6H).

$^{13}\text{C}$  NMR (126 MHz, Chloroform- $d$ )  $\delta$  139.78, 136.76, 136.18, 134.43, 133.53, 128.45 (d,  $J = 2.5$  Hz), 128.23, 126.18, 124.86, 124.19, 54.21, 26.38, 23.88, 11.31, -3.26.

HRMS (ESI) ( $m/z$ ):  $[M+H]$  calculated for  $\text{C}_{21}\text{H}_{26}\text{N}_2\text{Si}$ , 335.1944, found, 335.1938.



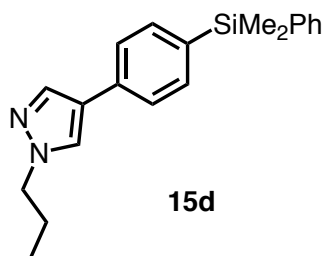

4-(4-(dimethyl(phenyl)silyl)phenyl)-1-propyl-1*H*-pyrazole (**15d**)

The general procedure for silylation was followed using *N,N,N*-trimethylanilinium iodide **15** (36 mg, 0.097 mmol) and dimethyphenylsilane (78  $\mu$ L, 0.5 mmol). Purification by flash chromatography (90:10 hexanes/EtOAc) gave the title compound as a white solid in 72% yield (22 mg, 0.069 mmol).

**<sup>1</sup>H NMR** (500 MHz, Chloroform-*d*)  $\delta$  7.79 (s, 1H), 7.64 (s, 1H), 7.57 – 7.49 (m, 4H), 7.49 – 7.45 (m, 2H), 7.40 – 7.33 (m, 3H), 4.11 (t, *J* = 7.1 Hz, 2H), 1.93 (q, *J* = 7.3 Hz, 2H), 0.95 (t, *J* = 7.4 Hz, 3H), 0.57 (s, 6H).

**<sup>13</sup>C NMR** (126 MHz, Chloroform-*d*)  $\delta$  138.44, 136.78, 135.93, 134.90, 134.29, 133.62, 129.21, 128.96, 127.94, 126.20, 124.98, 54.20, 23.87, 11.29, -2.21.

**HRMS** (ESI) (*m/z*): [*M*+*H*] calculated for C<sub>20</sub>H<sub>24</sub>N<sub>2</sub>Si, 321.1787, found, 321.1781.

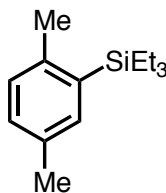

**16a**

(2,5-dimethylphenyl)triethylsilane (**16a**)

The general procedure for silylation was followed using *N,N,N*-trimethylanilinium iodide **16** (58 mg, 0.198 mmol) and triethylsilane (160  $\mu$ L, 1 mmol). Yield determined by NMR of the crude reaction mixture using CH<sub>2</sub>Br<sub>2</sub> as an internal standard (35%). The spectral data matches that previously reported in the literature.<sup>[23]</sup>

**<sup>1</sup>H NMR** (500MHz, Chloroform-*d*)  $\delta$  7.22 (s, 1H), 7.05 (q, *J* = 7.8 Hz, 2H), 2.39 (s, 3H), 2.31 (s, 3H), 0.95 (t, *J* = 8 Hz, 9H), 0.85 (q, *J* = 7.9 Hz, 6H).

**<sup>13</sup>C NMR** (126 MHz, Chloroform-*d*)  $\delta$  140.81, 136.30, 135.31, 133.83, 129.84, 129.78, 22.61, 21.30, 7.78, 4.16.

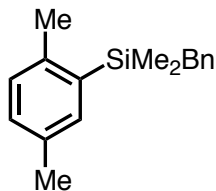

**16b**

benzyl(2,5-dimethylphenyl)dimethylsilane (**16b**)

The general procedure for silylation was followed using *N,N,N*-trimethylanilinium iodide **16** (58 mg, 0.198 mmol) and dimethylbenzylsilane (160  $\mu$ L, 1 mmol). Yield determined by NMR of the crude reaction mixture using  $\text{CH}_2\text{Br}_2$  as an internal standard (65%).

**$^1\text{H}$  NMR** (500MHz, Chloroform-*d*)  $\delta$  7.22 (d,  $J$ = 1.8 Hz, 1H), 7.19 (t,  $J$ = 7.5 Hz, 2H), 7.08 (qd,  $J$ = 8.1, 7.5, 4.9 Hz, 3H), 7.00- 6.92 (m, 2H), 2.40 (s, 3H), 2.38 (s, 3H), 0.28 (s, 6H).

**$^{13}\text{C}$  NMR** (126 MHz, Chloroform-*d*)  $\delta$  140.58, 140.11, 136.60, 135.57, 134.17, 130.20, 130.01, 128.48, 128.25, 124.21, 26.36, 22.84, 21.20, -1.95.

**HRMS** (EI) ( $m/z$ ): [M] calculated for  $\text{C}_{17}\text{H}_{22}\text{Si}$ , 254.1491, found, 254.1489.

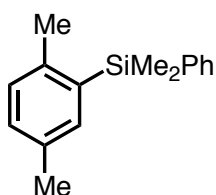

**16c**

(2,5-dimethylphenyl)dimethyl(phenyl)silane (**16c**)

The general procedure for silylation was followed using *N,N,N*-trimethylanilinium iodide **16** (58 mg, 0.198 mmol) and dimethylphenylsilane (156  $\mu$ L, 1 mmol). Yield determined by NMR of the crude reaction mixture using  $\text{CH}_2\text{Br}_2$  as an internal standard (47%).

**$^1\text{H}$  NMR** (500MHz, Chloroform-*d*)  $\delta$  7.56- 7.44 (m, 2H), 7.41- 7.28 (m, 4H), 7.13 (dd,  $J$ = 7.7, 2.1 Hz, 1H), 7.05 (dd,  $J$ = 7.7, 2.0 Hz, 1H), 2.33 (s, 3H), 2.22 (s, 3H), 0.58 (s, 6H).

**$^{13}\text{C}$  NMR** (126 MHz, Chloroform-*d*)  $\delta$  141.07, 139.24, 136.15, 134.32, 134.15, 134.11, 130.43, 129.99, 128.99, 127.93, 22.77, 21.24, -1.18.

**HRMS** (EI) ( $m/z$ ): [M] calculated for  $\text{C}_{16}\text{H}_{20}\text{Si}$ , 240.1334, found, 240.1344.

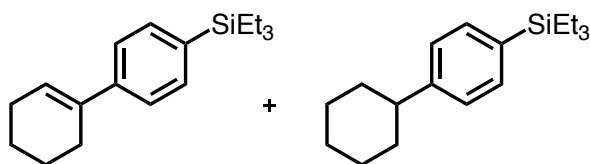

**17a**

**17a'**

triethyl(2',3',4',5'-tetrahydro-[1,1'-biphenyl]-4-yl)silane (**17a**)

The general procedure for silylation was followed using *N,N,N*-trimethylanilinium iodide **17** (137 mg, 0.399 mmol) and triethylsilane (192  $\mu$ L, 1.2 mmol). Reaction was run under a stream of nitrogen in order to prevent hydrogenation of the product. Purification by flash chromatography (100% hexanes) gave the title compound as a white solid in 45% yield (49 mg, 0.180 mmol) and the hydrogenated product in 10% yield (11mg, 0.040 mmol).

**17a:**

**<sup>1</sup>H NMR** (500 MHz, Chloroform-*d*)  $\delta$  7.43 (d,  $J$  = 7.8 Hz, 2H), 7.37 (d,  $J$  = 7.7 Hz, 2H), 6.16 (tt,  $J$  = 3.9, 1.7 Hz, 1H), 2.42 (tq,  $J$  = 6.5, 2.3 Hz, 2H), 2.21 (dh,  $J$  = 6.1, 2.8 Hz, 2H), 1.81 – 1.73 (m, 2H), 1.70 – 1.62 (m, 2H), 0.96 (t,  $J$  = 7.8 Hz, 9H), 0.78 (q,  $J$  = 7.8 Hz, 6H).

**<sup>13</sup>C NMR** (100 MHz, Chloroform-*d*)  $\delta$  142.94, 136.61, 135.42, 134.33, 125.04, 124.25, 27.36, 26.08, 23.23, 22.35, 7.58, 3.56.

**17a':**

**<sup>1</sup>H NMR** (500 MHz, Chloroform-*d*)  $\delta$  7.41 (d,  $J$  = 6.6 Hz, 2H), 7.19 (d,  $J$  = 6.9 Hz, 2H), 2.58 – 2.42 (m, 1H), 1.96 – 1.80 (m, 3H), 1.74 (d,  $J$  = 13.1 Hz, 1H), 1.41 (h,  $J$  = 12.4 Hz, 3H), 1.31 – 1.18 (m, 1H), 0.96 (t,  $J$  = 7.7 Hz, 9H), 0.77 (q,  $J$  = 8.0 Hz, 7H).

**<sup>13</sup>C NMR** (126 MHz, Chloroform-*d*)  $\delta$  148.64, 134.37, 134.34, 126.37, 44.66, 34.48, 27.10, 26.36, 7.62, 3.62.

**HRMS** (EI) (m/z): [M] calculated for C<sub>18</sub>H<sub>30</sub>Si, 274.2117, found, 274.2125.

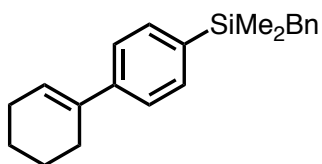**17b**

benzyl(dimethyl)(2',3',4',5'-tetrahydro-[1,1'-biphenyl]-4-yl)silane (**17b**)

The general procedure for silylation was followed using *N,N,N*-trimethylanilinium iodide **17** (136 mg, 0.396 mmol) and dimethybenzylsilane (190  $\mu$ L, 1.2 mmol). Reaction was run under a stream of nitrogen in order to prevent hydrogenation of the product. Purification by flash chromatography (100% hexanes to 98:2 hexanes/EtOAc) gave the title compound as a white solid in 59% yield (72 mg, 0.234 mmol).

**<sup>1</sup>H NMR** (400 MHz, Chloroform-*d*)  $\delta$  7.40 (d,  $J$  = 8.2 Hz, 2H), 7.36 (d,  $J$  = 8.1 Hz, 2H), 7.18 (t,  $J$  = 7.5 Hz, 2H), 7.06 (t,  $J$  = 7.3 Hz, 1H), 6.94 (d,  $J$  = 7.3 Hz, 2H), 6.16 (tt,  $J$  = 4.1, 1.7 Hz, 1H), 2.42 (dq,  $J$  = 6.1, 3.8, 3.1 Hz, 2H), 2.30 (s, 2H), 2.22 (dq,  $J$  = 6.3, 3.5 Hz, 2H), 1.79 (ddt,  $J$  = 12.0, 8.6, 4.5 Hz, 1H), 1.71 – 1.62 (m, 2H), 0.23 (s, 6H).

**<sup>13</sup>C NMR** (100 MHz, Chloroform-*d*)  $\delta$  143.40, 139.91, 136.60, 133.84, 128.46, 128.23, 125.30, 124.37, 124.17, 27.39, 26.39, 26.08, 23.20, 22.32, -3.24.

**HRMS** (EI) (m/z): [M] calculated for C<sub>21</sub>H<sub>26</sub>Si, 306.1804, found, 306.1811.

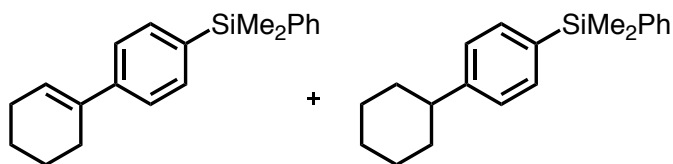**17c****17c'**

dimethyl(phenyl)(2',3',4',5'-tetrahydro-[1,1'-biphenyl]-4-yl)silane (**17c**)

The general procedure for silylation was followed using *N,N,N*-trimethylanilinium iodide **17** (138 mg, 0.402 mmol) and dimethyphenylsilane (187  $\mu$ L, 1.2 mmol). Reaction was run under a stream of nitrogen in order to prevent hydrogenation of the product. Purification by flash

chromatography (100% hexanes to 98:2 hexanes/EtOAc) gave the title compound as a white solid in 56% yield (65 mg, 0.222 mmol) and the hydrogenated product in 27% yield (32mg, 0.109 mmol).

**17c:**

**<sup>1</sup>H NMR** (500 MHz, Chloroform-*d*)  $\delta$  7.58 – 7.49 (m, 2H), 7.47 (d, *J* = 8.2 Hz, 2H), 7.36 (dt, *J* = 10.5, 3.6 Hz, 5H), 6.15 (tt, *J* = 5.7, 2.6 Hz, 1H), 2.41 (tq, *J* = 6.4, 2.1 Hz, 2H), 2.21 (dddd, *J* = 8.9, 6.6, 4.4, 2.5 Hz, 2H), 1.78 (ddt, *J* = 8.4, 6.1, 3.8 Hz, 2H), 1.70 – 1.61 (m, 2H), 0.54 (s, 6H).

**<sup>13</sup>C NMR** (126 MHz, Chloroform-*d*)  $\delta$  143.48, 136.10, 134.31, 133.14, 129.39, 129.16, 127.91, 127.84, 125.34, 124.47, 27.38, 26.06, 23.19, 22.30, -2.19.

**HRMS** (EI) (*m/z*): [M] calculated for C<sub>20</sub>H<sub>24</sub>Si, 292.1647, found, 292.1646.

**17c':**

**<sup>1</sup>H NMR** (500 MHz, Chloroform-*d*)  $\delta$  7.53 (dd, *J* = 4.8, 2.5 Hz, 2H), 7.45 (d, *J* = 7.7 Hz, 2H), 7.40 – 7.32 (m, 5H), 7.20 (d, *J* = 7.5 Hz, 2H), 2.49 (dt, *J* = 11.6, 5.7 Hz, 1H), 1.93 – 1.79 (m, 4H), 1.74 (d, *J* = 13.1 Hz, 1H), 1.49 – 1.32 (m, 4H), 1.32 – 1.19 (m, 1H), 0.54 (s, 6H).

**<sup>13</sup>C NMR** (126 MHz, Chloroform-*d*)  $\delta$  149.16, 134.38, 134.32, 129.23, 129.13, 127.94, 127.89, 126.55, 44.70, 34.45, 27.05, 26.32, -2.15.

**HRMS** (EI) (*m/z*): [M] calculated for C<sub>20</sub>H<sub>26</sub>Si, 294.1804, found, 294.1812.

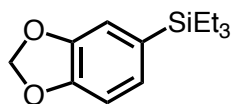

**18a**

benzo[*d*][1,3]dioxol-5-yltriethylsilane (**18a**)

The general procedure for silylation was followed using *N,N,N*-trimethylanilinium iodide **18** (60 mg, 0.195 mmol) and triethylsilane (160  $\mu$ L, 1 mmol). Purification by flash chromatography (100% hexanes) gave the title compound as a colorless oil in 68% yield (32 mg, 0.135 mmol). The spectral data matches that previously reported in the literature.<sup>[19]</sup>

**<sup>1</sup>H NMR** (400 MHz, Chloroform-*d*)  $\delta$  6.96 (d, *J* = 7.6 Hz, 1H), 6.94 (s, 1H), 6.84 (d, *J* = 7.6 Hz, 1H), 5.93 (s, 2H), 0.95 (t, *J* = 7.8 Hz, 9H), 0.75 (q, *J* = 7.9 Hz, 6H).

**<sup>13</sup>C NMR** (100 MHz, Chloroform-*d*)  $\delta$  148.26, 147.42, 130.44, 128.18, 113.57, 108.66, 100.55, 7.52, 3.66.

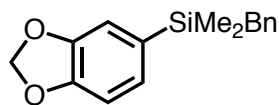

**18b**

benzo[*d*][1,3]dioxol-5-yl(benzyl)dimethylsilane (**18b**)

The general procedure for silylation was followed using *N,N,N*-trimethylanilinium iodide **18** (60 mg, 0.195 mmol) and dimethylbenzylsilane (160  $\mu$ L, 1 mmol). Purification by flash chromatography (100% hexanes) gave the title compound as a colorless oil in 79% yield (42 mg, 0.155 mmol).

**<sup>1</sup>H NMR** (500 MHz, Chloroform-*d*)  $\delta$  7.19 (t, *J* = 7.6 Hz, 2H), 7.07 (t, *J* = 7.3 Hz, 1H), 6.97 – 6.90 (m, 4H), 6.90 (s, 1H), 6.84 (d, *J* = 7.6 Hz, 1H), 5.95 (s, 2H), 2.27 (s, 2H), 0.22 (s, 6H).

**<sup>13</sup>C NMR** (126 MHz, Chloroform-*d*)  $\delta$  148.54, 147.45, 139.75, 128.42, 128.24, 127.86, 124.23, 113.19, 108.65, 100.67, 26.54, -3.08.

**HRMS** (EI) (*m/z*): [*M*] calculated for C<sub>16</sub>H<sub>18</sub>O<sub>2</sub>Si, 270.1076, found, 270.1084.

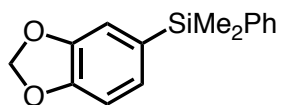

**18c**

benzo[*d*][1,3]dioxol-5-yl(dimethyl(phenyl)silane (**18c**)

The general procedure for silylation was followed using *N,N,N*-trimethylanilinium iodide **18** (61 mg, 0.199 mmol) and dimethyphenylsilane (156  $\mu$ L, 1 mmol). Purification by flash chromatography (100% hexanes) gave the title compound as a colorless oil in 60% yield (31 mg, 0.119 mmol).

**<sup>1</sup>H NMR** (400 MHz, Chloroform-*d*)  $\delta$  7.56 – 7.47 (m, 2H), 7.40 – 7.31 (m, 3H), 7.01 (d, *J* = 7.6 Hz, 1H), 6.96 (s, 1H), 6.84 (d, *J* = 7.6 Hz, 1H), 5.93 (s, 2H), 0.53 (s, 6H).

**<sup>13</sup>C NMR** (100 MHz, Chloroform-*d*)  $\delta$  148.63, 147.53, 138.45, 134.24, 131.36, 129.25, 128.39, 127.96, 113.65, 108.74, 100.69, -2.05.

**HRMS** (EI) (*m/z*): [*M*] calculated for C<sub>15</sub>H<sub>16</sub>O<sub>2</sub>Si, 256.0920, found, 256.0921.

## VII) Reduction Substrates

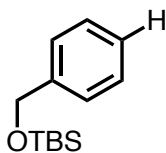

**19a**

(benzyloxy)(*tert*-butyl)dimethylsilane (**19a**)

The general procedure for reduction was followed using *N,N,N*-trimethylanilinium iodide **11** (41 mg, 0.101 mmol) and triethylsilane (80  $\mu$ L, 0.5 mmol) in dioxane at 60 °C. The crude reaction mixture was passed through a short silica gel plug with EtOAc and the solution was evaporated under reduced pressure. The yield was determined using CH<sub>2</sub>Br<sub>2</sub> (7  $\mu$ L) as an internal standard (68%) by <sup>1</sup>H NMR. The spectral data matches that previously reported in the literature. <sup>[24]</sup>

<sup>1</sup>H NMR (401 MHz, Chloroform-*d*)  $\delta$  7.33 (d, *J* = 4.4 Hz, 5H), 4.75 (s, 2H), 1.24 (s, 9H), 0.10 (s, 6H).

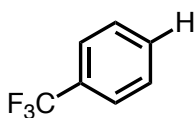

**19b**

trifluorotoluene (**19b**)

The general procedure for reduction was followed using *N,N,N*-trimethylanilinium iodide **8** (33 mg, 0.100 mmol) and triethylsilane (80  $\mu$ L, 0.5 mmol) in dioxane at 40 °C. The crude reaction mixture was passed through a short silica gel plug with EtOAc. The yield was determined by GC-FID analysis using tridecane as an internal standard due to volatility of the product (67%).

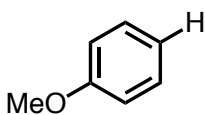

**19c**

anisole (**19c**)

The general procedure for reduction was followed using *N,N,N*-trimethylanilinium iodide **9** (29 mg, 0.989 mmol) and triethylsilane (80  $\mu$ L, 0.5 mmol) in DMF at room temperature for 2 hours. The crude reaction mixture was passed through a short silica gel plug with EtOAc. The yield was determined by GC-FID analysis using tridecane as an internal standard due to volatility of the product (20%).

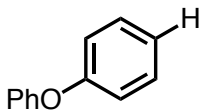

**4a**

diphenylether (**4a**)

The general procedure for reduction was followed using *N,N,N*-trimethylanilinium iodide **10** (36 mg, 0.101 mmol) and triethylsilane (80  $\mu$ L, 0.5 mmol) in DMF at room temperature for 2 hours. The crude reaction mixture was passed through a short silica gel plug with EtOAc. The yield was determined by GC-FID analysis using tridecane as an internal standard due to volatility of the product (60%).

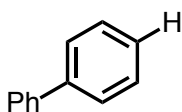

**3a**

biphenyl (**3a**)

The general procedure for reduction was followed using *N,N,N*-trimethylanilinium iodide **2** (36 mg, 0.100 mmol) and triethylsilane (80  $\mu$ L, 0.5 mmol) in DMF at room temperature for overnight. The crude reaction mixture was passed through a short silica gel plug with EtOAc. The yield was determined by GC-FID analysis using tridecane as an internal standard due to volatility of the product (98%).

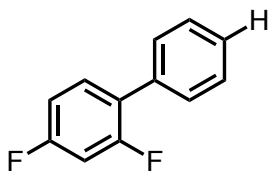

**19d**

2,4-difluoro-1,1'-biphenyl (**19d**)

The general procedure for reduction was followed using *N,N,N*-trimethylanilinium iodide **13** (75 mg, 0.200 mmol) and triethylsilane (160  $\mu$ L, 1 mmol) at room temperature. Purification by flash chromatography (100% hexanes/) gave the title compound as a white solid in 67% yield (25 mg, 0.134 mmol) with approximately 10% of an impurity that could not be separated by silica chromatography. The spectral data matches that previously reported in the literature.<sup>[25]</sup>

**<sup>1</sup>H NMR** (400 MHz, Chloroform-*d*)  $\delta$  7.51 (d,  $J$  = 7.9 Hz, 2H), 7.49 – 7.41 (m, 3H), 7.41 – 7.34 (m, 1H), 7.01 – 6.83 (m, 2H).

**<sup>19</sup>F NMR** (376 MHz, Chloroform-*d*)  $\delta$  -111.62 (p,  $J$  = 8.0 Hz), -113.66 (q,  $J$  = 9.2 Hz).

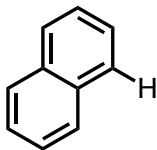

**19e**  
naphthalene (**19e**)

The general procedure for reduction was followed using *N,N,N*-trimethylanilinium iodide (63 mg, 0.201 mmol) and triethylsilane (160  $\mu$ L, 1 mmol) in DMF at 40 °C. The crude reaction mixture was passed through a short silica gel plug with EtOAc. The yield was determined by GC-FID analysis using tridecane as an internal standard due to volatility of the product (81%).

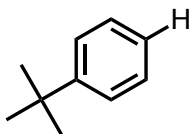

**19f**  
tert-butylbenzene (**19f**)

The general procedure for reduction was followed using *N,N,N*-trimethylanilinium iodide **7** (32 mg, 0.100 mmol) and triethylsilane (80  $\mu$ L, 0.5 mmol) in dioxane at 40 °C. The crude reaction mixture was passed through a short silica gel plug with EtOAc. The yield was determined by GC-FID analysis using tridecane as an internal standard due to volatility of the product (75%).

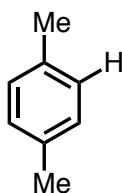

**19g**  
*p*-xylene (**19g**)

The general procedure for reduction was followed using *N,N,N*-trimethylanilinium iodide **16** (29 mg, 0.100 mmol) and triethylsilane (80  $\mu$ L, 0.5 mmol) in dioxane at 60 °C. The crude reaction mixture was passed through a short silica gel plug with EtOAc. The yield was determined by GC-FID analysis using tridecane as an internal standard due to volatility of the product (15%).



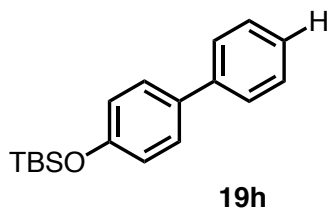

([1,1'-biphenyl]-4-yloxy)(*tert*-butyl)dimethylsilane (**19h**)

The general procedure for reduction was followed using *N,N,N*-trimethylanilinium iodide **12** (48 mg, 0.102 mmol) and triethylsilane (80  $\mu$ L, 0.5 mmol) in dioxane at 40 °C. The crude reaction mixture was passed through a short silica gel plug with EtOAc and the solution was evaporated under reduced pressure. The yield was determined using CH<sub>2</sub>Br<sub>2</sub> (7  $\mu$ L) as an internal standard (80%) by <sup>1</sup>H NMR. The spectral data matches that previously reported in the literature.<sup>[17]</sup>

**<sup>1</sup>H NMR** (500 MHz, Chloroform-*d*)  $\delta$  7.59 – 7.51 (m, 2H), 7.50 – 7.45 (m, 2H), 7.41 (t, *J* = 7.7 Hz, 2H), 7.35 – 7.27 (m, 1H), 6.91 (d, *J* = 8.6 Hz, 1H), 1.01 (s, 9H), 0.24 (s, 6H).

**<sup>13</sup>C NMR** (126 MHz, Chloroform-*d*)  $\delta$  155.42, 141.04, 134.43, 128.81, 128.22, 126.88, 126.78, 120.46, 25.86, 18.39, -4.22.

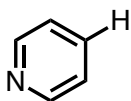

pyridine (**19i**)

The general procedure for reduction was followed using *N,N,N*-trimethylanilinium iodide (26 mg, 0.098 mmol) and triethylsilane (80  $\mu$ L, 0.5 mmol) in dioxane at 90 °C. The crude reaction mixture was passed through a short silica gel plug with EtOAc. The yield was determined by GC-FID analysis using tridecane as an internal standard due to volatility of the product (37%).

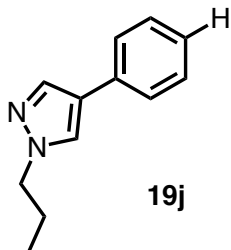

4-phenyl-1-propyl-1*H*-pyrazole (**19j**)

The general procedure for reduction was followed using *N,N,N*-trimethylanilinium iodide **15** (77 mg, 0.207 mmol) and triethylsilane (160  $\mu$ L, 1 mmol). Purification by flash chromatography (90:10% hexanes/EtOAc) gave the title compound as a white solid in 90% yield (35 mg, 0.189 mmol).

**<sup>1</sup>H NMR** (500 MHz, Chloroform-*d*)  $\delta$  7.78 (s, 1H), 7.63 (s, 1H), 7.48 (d, *J* = 8.3 Hz, 2H), 7.43 – 7.30 (m, 2H), 7.25 – 7.16 (m, 1H), 4.11 (t, *J* = 7.1 Hz, 2H), 2.35 – 1.83 (m, 2H), 0.95 (t, *J* = 7.4 Hz, 3H).

**<sup>13</sup>C NMR** (126 MHz, Chloroform-*d*) δ 136.71, 132.93, 128.97, 126.40, 126.07, 125.61, 122.89, 54.22, 23.91, 11.33.

**HRMS** (ESI) (m/z): [M+H] calculated for C<sub>12</sub>H<sub>14</sub>N<sub>2</sub>, 187.1235, found, 187.1226.

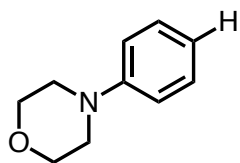

**19k**

4-phenylmorpholine (**19k**)

The general procedure for reduction was followed using *N,N,N*-trimethylanilinium iodide **13** (67 mg, 0.192 mmol) and triethylsilane (160 μL, 1 mmol) at 60 °C. Purification by flash chromatography (95:5% hexanes/EtOAc) gave the title compound as a white solid in 90% yield (20 mg, 0.150 mmol). The spectral data matches that previously reported in the literature.<sup>[26]</sup>

**<sup>1</sup>H NMR** (500 MHz, Chloroform-*d*) δ 7.29 (t, *J* = 7.8 Hz, 2H), 6.93 (d, *J* = 8.1 Hz, 2H), 6.89 (t, *J* = 7.3 Hz, 1H), 3.87 (t, *J* = 4.8 Hz, 4H), 3.17 (t, *J* = 4.8 Hz, 4H).

**<sup>13</sup>C NMR** (126 MHz, Chloroform-*d*) δ 151.42, 129.32, 120.18, 115.85, 67.09, 49.51.

### VIII) Synthetic Demonstrations

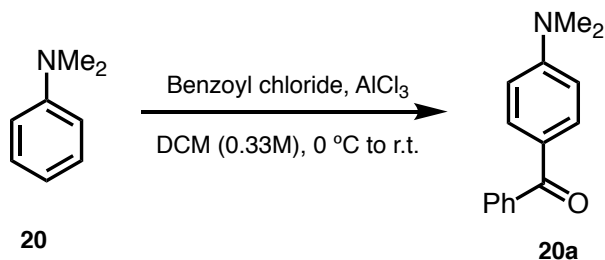

(4-(dimethylamino)phenyl)(phenyl)methanone (**20a**)

To a suspension of AlCl<sub>3</sub> (520 mg, 3.92 mmol, 1.00 equiv) in DCM (12.5 mL) at 0 °C was slowly added benzoylchloride (0.46 mL, 3.92 mmol, 1.00 equiv). Dimethylaniline (0.52 mL, 4.12 mmol, 1.05 equiv) was then added dropwise and the reaction was stirred at 0 °C for 4 hours before stirring at room temperature for 3 hours. Dilute reaction mixture with DCM and add ~15 mL H<sub>2</sub>O. Wash organic layer 2x20 mL H<sub>2</sub>O, 2x20 mL sat. NaHCO<sub>3</sub>, 1x20 mL brine. Dry organic layer over Na<sub>2</sub>SO<sub>4</sub> and concentrate. Purification by flash chromatography (90:10 hexanes/EtOAc) gave the title compound as a yellow solid in 43% yield (401 mg, 1.69 mmol) (*p*-/*o*- benzoylation observed in ~2:1 ratio).<sup>[27]</sup>

**<sup>1</sup>H NMR** (401 MHz, Chloroform-*d*) δ 7.80 (d, *J* = 9.0 Hz, 2H), 7.75 – 7.68 (m, 2H), 7.57 – 7.50 (m, 1H), 7.48 – 7.42 (m, 2H), 6.68 (d, *J* = 9.0 Hz, 2H), 3.08 (s, 6H).

**<sup>13</sup>C NMR** (100 MHz, Chloroform-*d*) δ 195.26, 153.42, 139.44, 132.86, 131.22, 129.57, 128.12, 124.91, 110.67, 40.19.

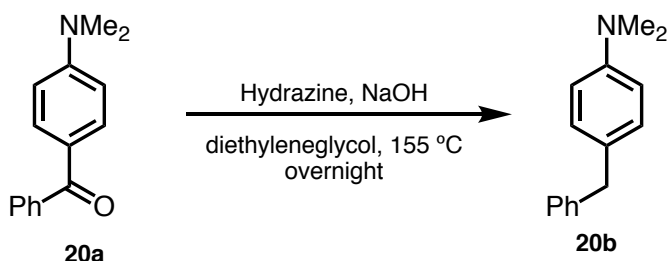

4-benzyl-*N,N*-dimethylaniline (**20b**)

NaOH (1.02g, 25.5 mmol, 5 equiv) and hydrazine hydrate (1.25g, 25.5 mmol, 5 equiv) were added to a round bottom containing **20a** (1.17g, 5.1 mmol, 1 equiv) in ethyleneglycol (30 mL). A reflux condenser was attached and the mixture was heated to 155 °C overnight. The reaction mixture was cooled to room temperature and diluted with 50 mL EtOAc and 50 mL H<sub>2</sub>O. The mixture was then extracted 2x50 mL EtOAc. The organic layers were dried over Na<sub>2</sub>SO<sub>4</sub> and concentrated. Purification by flash chromatography (95:5 hexanes/EtOAc) gave the title compound as a clear oil in 80% yield (860 mg, 4.08 mmol).<sup>[27]</sup>

**<sup>1</sup>H NMR** (500 MHz, Chloroform-*d*) δ 7.28 (d, *J* = 8.0 Hz, 2H), 7.20 – 7.15 (m, 3H), 7.07 (d, *J* = 8.9 Hz, 2H), 6.70 (d, *J* = 8.8 Hz, 2H), 3.90 (s, 2H), 2.91 (s, 6H).

**<sup>13</sup>C NMR** (126 MHz, Chloroform-*d*) δ 149.28, 142.20, 129.67, 129.38, 128.94, 128.47, 113.09, 41.06, 40.98.

**HRMS** (EI) (*m/z*): [*M*] calculated for C<sub>17</sub>H<sub>19</sub>N, 227.1464, found, 227.1464.

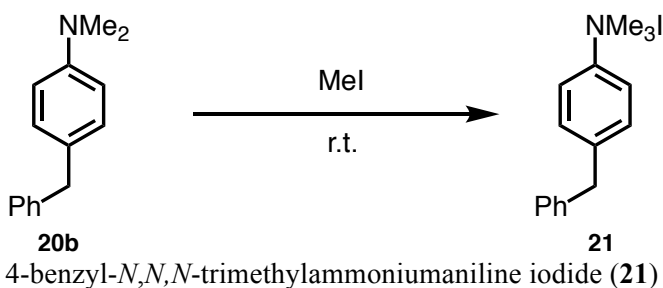

To a dry vial with a stirbar was added **20b** (860 mg, 4.07 mmol, 1 equiv) and MeI (2.55 mL, 41.00 mmol, 10 equiv). The vial was sealed with a teflon cap and stirred until the reaction solidified (~5 hours). The contents were suspended in Et<sub>2</sub>O and filtered, washing with 3x15 mL Et<sub>2</sub>O to remove any unreacted starting material. The ammonium salt was dried on high vac for ~2 hours and used as is for subsequent reactions. The product was obtained as a white crystalline powder in 83% yield (1.2g, 2.80 mmol) and used without further purification.

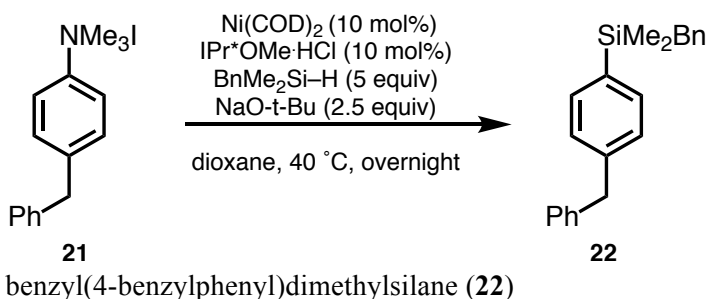

The general procedure for silylation was followed using *N,N,N*-trimethylanilinium iodide **21** (76 mg, 0.215 mmol) and benzyldimethylsilane (158  $\mu$ L, 1 mmol). Purification by flash chromatography (100% hexanes) gave an inseparable mixture of the title compound in 66% yield (45 mg, 0.142 mmol) and 1,2-dibenzyl-1,1,2,2-tetramethyldisilane (12 mg, 0.040 mmol).

**<sup>1</sup>H NMR** (500 MHz, Chloroform-*d*)  $\delta$  7.39 (dd, *J* = 8.1, 2.6 Hz, 2H), 7.31 (td, *J* = 7.7, 7.2, 2.3 Hz, 2H), 7.20 (dq, *J* = 14.3, 6.1 Hz, 7H), 7.11 – 7.03 (m, 2H), 6.95 (dd, *J* = 8.0, 2.7 Hz, 2H), 4.00 (s, 2H), 2.30 (d, *J* = 2.7 Hz, 2H), 0.23 (d, *J* = 2.8 Hz, 6H).

**<sup>13</sup>C NMR** (126 MHz, Chloroform-*d*)  $\delta$  142.15, 141.07, 139.88, 135.93, 134.06, 129.11, 128.61, 128.50, 128.45, 128.23, 128.14, 126.24, 124.18, 124.04, 42.09, 32.20, 28.99, 26.37, 0.74, -3.25.

**HRMS** (EI) (*m/z*): [*M*] calculated for C<sub>22</sub>H<sub>24</sub>Si, 316.1647, found, 316.1641.

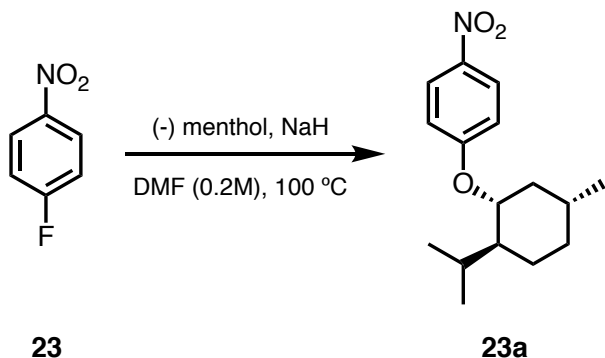

A solution of (–)-menthol (3.4g, 21.7 mmol, 2.0 equiv) in DMF (4 mL) was added dropwise to a flame dried 20 mL scintillation vial equipped with a stir bar containing a solution of NaH (60% dispersion in mineral oil) (120mg, 30 mmol, 3.0 equiv) in DMF (1 mL) at 0 °C. After 30min the vial was allowed to warm to room temperature. 4-fluoro-nitrobenzene (1.06 mL, 10 mmol, 1.0 equiv) was added slowly and the vial was sealed with a Teflon cap and heated to 90 °C for 48 hours. The solution was then cooled to room temperature, transferred to a separatory funnel, and diluted with 30 mL diethyl ether. The organics were then washed 2x50 mL 5M NaOH solution and 1x50 mL brine. The organic layer was dried with sodium sulfate before concentrating. The product can be obtained via Kugelrohr distillation at 0.5 bar at 80 °C through the removal of unreacted 4-fluoro-nitrobenzene and excess menthol. The product was obtained as a yellow crystalline solid. The discoloration was removed through Purification by flash chromatography (90:10 hexanes/EtOAc) to give the title compound as a white crystalline solid in 30% yield (1.72 g, 6.2 mmol).

**<sup>1</sup>H NMR** (401 MHz, Chloroform-*d*) δ 8.18 (d, *J* = 8.9 Hz, 2H), 6.93 (d, *J* = 9.0 Hz, 2H), 4.16 (td, *J* = 10.6, 4.2 Hz, 1H), 2.20 – 2.04 (m, 2H), 1.85 – 1.69 (m, 2H), 1.63 – 1.46 (m, 2H), 1.18 – 1.01 (m, 3H), 0.93 (t, *J* = 7.5 Hz, 6H), 0.75 (d, *J* = 6.9 Hz, 3H).

**<sup>13</sup>C NMR** (176 MHz, Chloroform-*d*) δ 163.85, 141.13, 126.22, 115.13, 78.53, 47.96, 40.00, 34.43, 31.54, 26.38, 23.90, 22.19, 20.74, 16.77.

**HRMS** (ESI) (*m/z*): [*M*+Na] calculated for C<sub>16</sub>H<sub>23</sub>NO<sub>3</sub>, 300.1570, found, 300.1580.

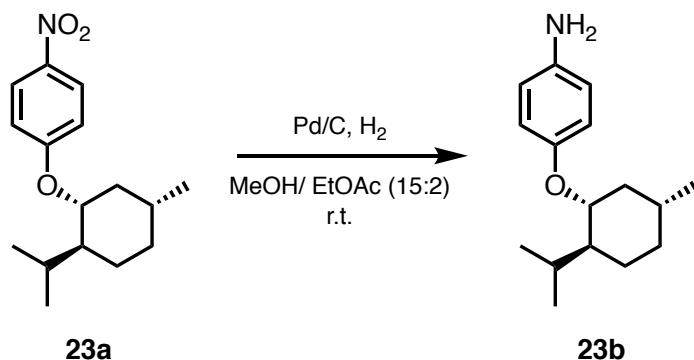

4-(((1*R*,2*S*,5*R*)-2-isopropyl-5-methylcyclohexyl)oxy)aniline (**23b**)

To a round bottom equipped with a stir bar was added **23a** (400 mg, 1.44 mmol) and palladium on carbon (10%) (40 mg, 2.5 mol%). The flask was backfilled three times with nitrogen before adding methanol (15 mL) and EtOAc (2 mL). The flask was then backfilled three times with H<sub>2</sub> before attaching a H<sub>2</sub> balloon. The reaction was left to stir at room temperature overnight. The contents of the flask were then filtered through Celite with EtOAc. The filtrate was concentrated to give the title compound as a reddish solid in 97% yield (344 mg, 1.39 mmol).

**<sup>1</sup>H NMR** (700 MHz, Chloroform-*d*) δ 6.75 (d, *J* = 8.6 Hz, 2H), 6.63 (d, *J* = 8.7 Hz, 1H), 3.82 (td, *J* = 10.5, 4.2 Hz, 1H), 3.42 (s, 2H), 2.28 (pd, *J* = 7.0, 2.7 Hz, 1H), 2.11 (dtd, *J* = 12.6, 3.8, 1.9 Hz, 1H), 1.69 (dt, *J* = 14.3, 3.7 Hz, 2H), 1.45 (ddt, *J* = 13.3, 10.4, 3.2 Hz, 1H), 1.39 (tdq, *J* = 12.6, 6.6, 3.3 Hz, 1H), 1.10 – 1.02 (m, 1H), 1.01 – 0.94 (m, 1H), 0.92 (dd, *J* = 24.6, 6.8 Hz, 7H), 0.80 (d, *J* = 6.9 Hz, 3H).

**<sup>13</sup>C NMR** (176 MHz, Chloroform-*d*) δ 151.50, 140.24, 118.09, 116.51, 79.17, 48.34, 40.73, 34.70, 31.60, 26.03, 23.70, 22.32, 21.02, 16.58.

**HRMS** (ESI) (*m/z*): [*M*+H] calculated for C<sub>16</sub>H<sub>25</sub>NO, 248.2009, found, 248.2016.

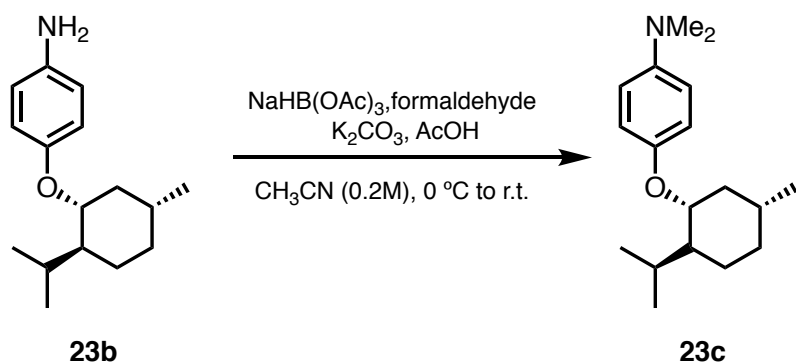

4-(((1*R*,2*R*,5*R*)-2-isopropyl-5-methylcyclohexyl)oxy)-*N,N*-dimethylaniline (**23c**)

To a round bottom equipped with a stir bar was dissolved **23b** (344 mg, 1.39 mmol, 1.0 equiv) in acetonitrile (5 mL).  $\text{K}_2\text{CO}_3$  (384 mg, 2.78 mmol, 2.0 equiv) and an aqueous formaldehyde solution (37%) (0.62 mL, 8.34 mmol, 6.0 equiv) were added and the reaction was stirred for 30 min. The reaction was then cooled in an ice bath for 5 min before adding sodium triacetoxyborohydride (883 mg, 4.17 mmol, 3.0 equiv) in 200 mg portions over 5 min. Acetic acid (1 mL) was slowly added and the reaction was warmed and allowed to stir at room temperature overnight. Quench the reaction with 15 mL  $\text{H}_2\text{O}$  and 15 mL EtOAc. Basify with sat.  $\text{NaHCO}_3$  and extract 3x25 mL EtOAc. Wash organic layers with 1x25 mL brine and dry over sodium sulfate before concentrating. The product was obtained as a light brown crystalline solid in 88% yield (336 mg, 1.21 mmol) with no need for further purification.<sup>[28]</sup>

**$^1\text{H}$  NMR** (400 MHz, Chloroform-*d*)  $\delta$  6.84 (d,  $J = 9.0$  Hz, 2H), 6.72 (d,  $J = 8.9$  Hz, 2H), 3.85 (td,  $J = 10.5, 4.2$  Hz, 1H), 2.87 (s, 6H), 2.29 (pd,  $J = 7.1, 2.7$  Hz, 1H), 2.12 (d,  $J = 12.4$  Hz, 1H), 1.70 (dt,  $J = 14.6, 3.8$  Hz, 2H), 1.55 – 1.33 (m, 3H), 1.07 (td,  $J = 13.2, 9.6$  Hz, 2H), 0.98 (m, 1H), 0.92 (dd,  $J = 15.7, 6.7$  Hz, 6H), 0.80 (d,  $J = 6.9$  Hz, 3H).

**$^{13}\text{C}$  NMR** (100 MHz, Chloroform-*d*)  $\delta$  150.57, 145.97, 117.81, 114.88, 79.02, 48.34, 41.91, 40.76, 34.73, 31.61, 26.06, 23.74, 22.34, 21.04, 16.62.

**HRMS** (ESI) ( $m/z$ ):  $[\text{M}+\text{H}]$  calculated for  $\text{C}_{18}\text{H}_{29}\text{NO}$ , 276.2327, found, 276.2323.

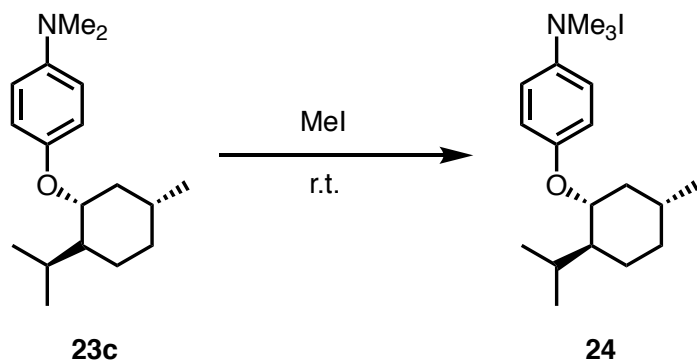

4-(((1*R*,2*R*,5*R*)-2-isopropyl-5-methylcyclohexyl)oxy)-*N,N,N*-trimethylammoniumaniline iodide (**21**)

To a dry vial with a stirbar was added **23c** (336 mg, 1.21 mmol, 1 equiv) and MeI (0.75 mL, 12.10 mmol, 10 equiv). The vial was sealed with a teflon cap and stirred until the reaction solidified (~5 hours). The contents were suspended in Et<sub>2</sub>O and filtered, washing with 3x10 mL Et<sub>2</sub>O to remove any unreacted starting material. The ammonium salt was dried on high vac for ~2 hours and used as is for subsequent reactions. The product was obtained as a white powder in 83% yield (419 mg, 1.00 mmol) and used without further purification.

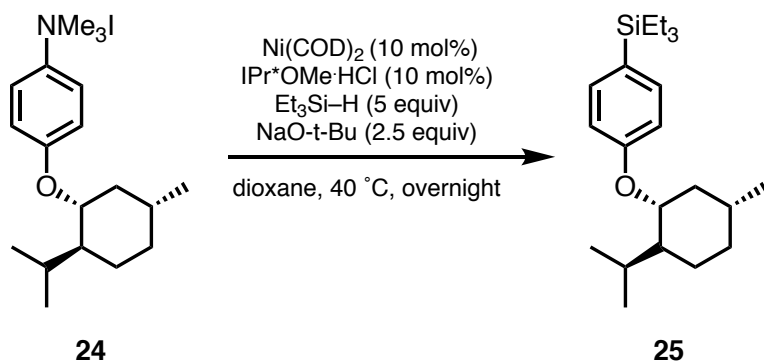

triethyl(4-(((1R,2R,5R)-2-isopropyl-5-methylcyclohexyl)oxy)phenyl)silane (**25**)

The general procedure for silylation was followed using *N,N,N*-trimethylanilinium iodide **24** (87 mg, 0.208 mmol) and triethylsilane (160  $\mu$ L, 1 mmol). Purification by flash chromatography (100% hexanes) gave the title compound as a clear oil in 58% yield (40 mg, 0.121 mmol).

**<sup>1</sup>H NMR** (500 MHz, Chloroform-*d*)  $\delta$  7.38 (d,  $J$  = 8.1 Hz, 1H), 6.89 (d,  $J$  = 8.4 Hz, 1H), 4.06 (td,  $J$  = 10.5, 4.3 Hz, 1H), 2.20 (ddt,  $J$  = 16.5, 12.8, 3.7 Hz, 1H), 1.72 (dd,  $J$  = 11.8, 3.1 Hz, 1H), 1.60 – 1.38 (m, 1H), 1.10 (qd,  $J$  = 12.6, 2.9 Hz, 1H), 1.05 – 0.87 (m, 12H), 0.84 – 0.71 (m, 7H).

**<sup>13</sup>C NMR** (126 MHz, Chloroform-*d*)  $\delta$  159.10, 135.73, 127.87, 115.28, 77.04, 48.18, 40.46, 34.70, 31.58, 26.17, 23.87, 22.30, 20.96, 16.76, 7.61, 3.71.

**HRMS** (EI) ( $m/z$ ): [M] calculated for C<sub>22</sub>H<sub>38</sub>OSi, 346.2692, found, 346.2682.

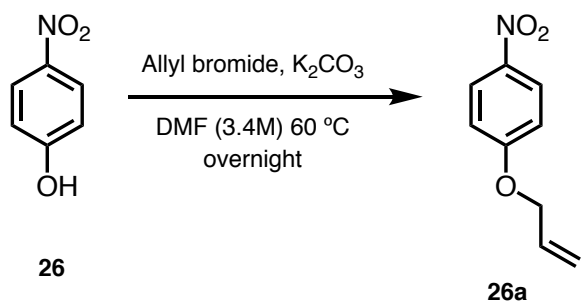

1-(allyloxy)-4-nitrobenzene (**26a**)

To a solution of **26** (1g, 7.19 mmol, 1.00 equiv) in DMF (3 mL, 2.4M) was added K<sub>2</sub>CO<sub>3</sub> (1g, 7.19 mmol, 1.00 equiv). Allylbromide (0.68 mL, 7.90 mmol, 1.10 equiv) was added and a reflux condenser was added before heating to 60 °C overnight. Upon cooling to room temperature, 20 mL H<sub>2</sub>O and 20 mL Et<sub>2</sub>O were added and the reaction mixture was extracted 2x20 mL Et<sub>2</sub>O. The combined organics were then washed 2x20 mL 1M NaOH, 1x20 mL brine, and dried over MgSO<sub>4</sub> before concentrating. The product was obtained via Kugelrohr distillation to give a yellow oil that was carried on to the next step without further purification.<sup>[29]</sup>

**<sup>1</sup>H NMR** (401 MHz, Chloroform-*d*)  $\delta$  8.20 (d,  $J$  = 9.3 Hz, 1H), 6.97 (d,  $J$  = 9.2 Hz, 1H), 6.04 (ddt,  $J$  = 17.4, 10.6, 5.3 Hz, 1H), 5.44 (dt,  $J$  = 17.3, 1.5 Hz, 1H), 5.35 (dt,  $J$  = 10.6, 1.4 Hz, 1H), 4.64 (dt,  $J$  = 5.4, 1.6 Hz, 2H).

**<sup>13</sup>C NMR** (100 MHz, Chloroform-*d*)  $\delta$  163.71, 141.73, 132.01, 126.03, 118.82, 114.84, 69.54.

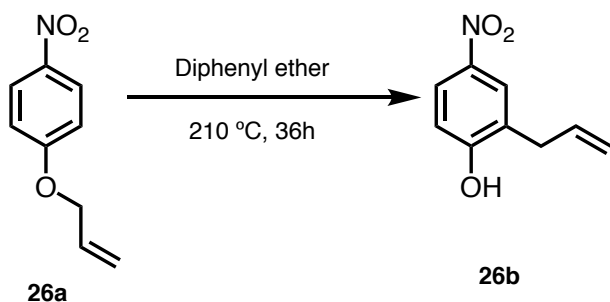

2-allyl-4-nitrophenol (**26b**)

Crude **26a** (~1.3g) and an equal weight of diphenylether were added to a round bottom equipped with a reflux condenser. The mixture was heated to 210 °C for 36 hours. The reaction was cooled to room temperature and diluted with 30 mL Et<sub>2</sub>O. The organics were extracted 3x30 mL 6M NaOH. The combined aqueous layers were acidified with conc. HCl. The acidic aqueous solution was then extracted 3X30 mL Et<sub>2</sub>O. The ether layers were combined and dried over MgSO<sub>4</sub>. The product can be recrystallized. Product was obtained as a yellow crystalline solid in 46% over two steps (593 mg, 3.31 mmol).<sup>[29]</sup>

**<sup>1</sup>H NMR** (500 MHz, Chloroform-*d*)  $\delta$  8.06 (m, 2H), 6.89 (d,  $J$  = 8.7 Hz, 1H), 6.01 (ddt,  $J$  = 16.8, 10.4, 6.6 Hz, 1H), 5.88 (br, 1H), 5.30 – 5.16 (m, 2H), 3.47 (d,  $J$  = 6.4 Hz, 2H).

**<sup>13</sup>C NMR** (126 MHz, Chloroform-*d*)  $\delta$  159.90, 141.77, 134.72, 126.60, 126.54, 124.44, 118.19, 116.01, 34.79.

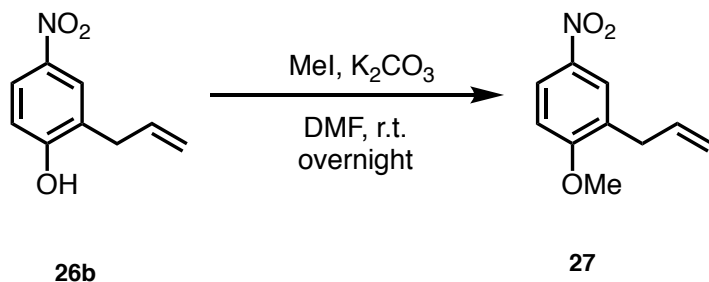

2-allyl-1-methoxy-4-nitrobenzene (**27**)

In a dry round bottom, **26b** (1.00 g, 5.58 mmol, 1 equiv) was dissolved in DMF (10 mL). K<sub>2</sub>CO<sub>3</sub> (1.77g, 12.84 mmol, 2.3 equiv) was added followed by MeI (0.80 mL, 12.84 mmol, 2.3 equiv). The mixture was stirred at room temperature overnight. The reaction was quenched with 50 ml Et<sub>2</sub>O and 50 ml H<sub>2</sub>O. The organics were washed 2x40 mL 1M NaOH, then 1x40 mL brine followed by drying of the organics over MgSO<sub>4</sub>. The product was obtained as pure a yellow oil in 97% yield (1.05 g, 5.41 mmol) with no need for further purification.<sup>[30]</sup>



**<sup>1</sup>H NMR** (500 MHz, Chloroform-*d*)  $\delta$  8.14 (dd,  $J$  = 9.0, 2.8 Hz, 1H), 8.05 (d,  $J$  = 2.8 Hz, 1H), 6.90 (d,  $J$  = 9.0 Hz, 1H), 5.96 (ddt,  $J$  = 16.9, 10.1, 6.7 Hz, 1H), 5.21 – 5.03 (m, 2H), 3.94 (s, 3H), 3.41 (d,  $J$  = 6.6 Hz, 2H).

**<sup>13</sup>C NMR** (176 MHz, Chloroform-*d*)  $\delta$  162.41, 141.44, 135.16, 130.04, 125.44, 124.16, 117.14, 109.80, 56.23, 34.07.

**HRMS** (ESI) ( $m/z$ ): [M+H] calculated for C<sub>10</sub>H<sub>15</sub>NO, 194.0812, found, 194.0811.

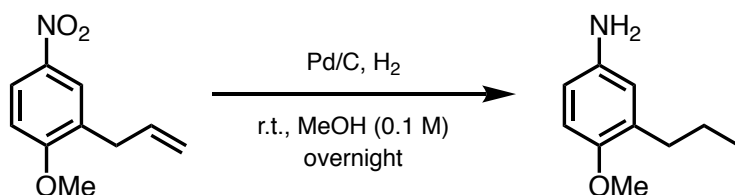

**27**  
4-methoxy-3-propylaniline (**27a**)

To a round bottom equipped with a stir bar was added **27** (1.05 g, 5.43 mmol) and palladium on carbon (10%) (144 mg, 2.5 mol%). The flask was backfilled three times with nitrogen before adding methanol (50 mL). The flask was then backfilled three times with H<sub>2</sub> before attaching a H<sub>2</sub> balloon. The reaction was left to stir at room temperature overnight. The contents of the flask were then filtered through Celite with DCM. The filtrate was concentrated to give the title compound in quantitative yield as an off-white crystalline solid.

**<sup>1</sup>H NMR** (400 MHz, Chloroform-*d*)  $\delta$  6.68 (d,  $J$  = 8.3 Hz, 1H), 6.57 – 6.47 (m, 2H), 3.75 (s, 3H), 3.37 (s, 2H), 2.55 – 2.47 (m, 3H), 1.58 (h,  $J$  = 7.3 Hz, 3H), 0.95 (t,  $J$  = 7.3 Hz, 3H).

**<sup>13</sup>C NMR** (100 MHz, Chloroform-*d*)  $\delta$  151.02, 139.68, 132.35, 117.86, 113.26, 111.96, 56.21, 32.40, 23.24, 14.26.

**HRMS** (ESI) ( $m/z$ ): [M+H] calculated for C<sub>10</sub>H<sub>15</sub>NO, 166.1226, found, 166.1225.

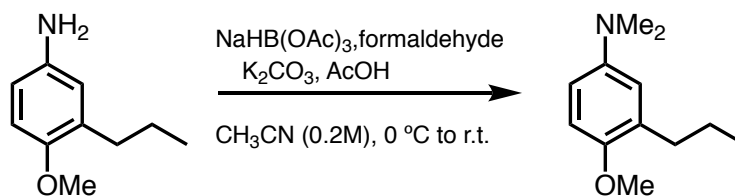

**27a**  
4-methoxy-*N,N*-dimethyl-3-propylaniline (**27b**)

To a round bottom equipped with a stir bar was dissolved **27a** (897 mg, 5.43 mmol, 1.0 equiv) in acetonitrile (25 mL). K<sub>2</sub>CO<sub>3</sub> (1.5 g, 10.86 mmol, 2.0 equiv) and an aqueous formaldehyde solution (37%) (2.42 mL, 32.58 mmol, 6.0 equiv) were added and the reaction was stirred for 30 min. The reaction was then cooled in an ice bath for 5 min before adding sodium triacetoxyborohydride (3.45 mg, 16.29 mmol, 3.0 equiv) in 500 mg portions over 5 min. Acetic

acid (2.5 mL) was slowly added and the reaction was warmed and allowed to stir at room temperature overnight. Quench the reaction with 50 mL H<sub>2</sub>O and 50 mL EtOAc. Basify with sat. NaHCO<sub>3</sub> and extract 3x50 mL EtOAc. Wash organic layers with 1x25 mL brine and dry over sodium sulfate before concentrating. The product was obtained as a crystalline solid in 83% yield (876 mg, 4.51 mmol) with no need for further purification.

**<sup>1</sup>H NMR** (400 MHz, Chloroform-*d*) δ 6.78 (d, *J* = 8.8 Hz, 1H), 6.66 (d, *J* = 3.2 Hz, 1H), 6.60 (dd, *J* = 8.8, 3.1 Hz, 1H), 3.77 (s, 3H), 2.86 (s, 6H), 2.57 (dd, *J* = 8.8, 6.7 Hz, 2H), 1.62 (h, *J* = 7.4 Hz, 2H), 0.97 (t, *J* = 7.3 Hz, 3H).

**<sup>13</sup>C NMR** (100 MHz, Chloroform-*d*) δ 150.36, 145.66, 132.02, 116.69, 111.85, 111.83, 56.24, 42.06, 32.93, 23.49, 14.33.

**HRMS** (ESI) (*m/z*): [*M*+*H*] calculated for C<sub>12</sub>H<sub>19</sub>NO, 194.1545, found, 194.1536.

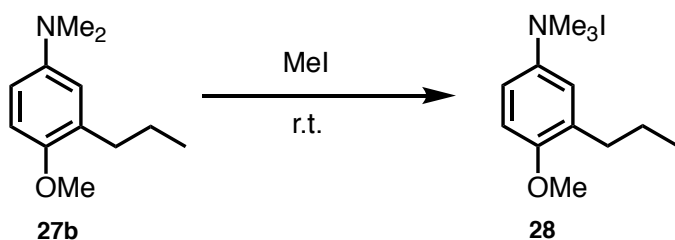

4-methoxy-3-propyl-*N,N,N*-trimethylanilinium iodide (**28**)

To a dry vial with a stirbar was added **27b** (860 mg, 4.53 mmol, 1 equiv) and MeI (2.82 mL, 45.30 mmol, 10 equiv). The vial was sealed with a teflon cap and stirred until the reaction solidified (~5 hours). The contents were suspended in Et<sub>2</sub>O and filtered, washing with 3x15 mL Et<sub>2</sub>O to remove any unreacted starting material. The ammonium salt was dried on high vac for ~2 hours and used as is for subsequent reactions. The product was obtained as a white crystalline powder in 88% yield (1.33g, 3.99 mmol) and used without further purification.

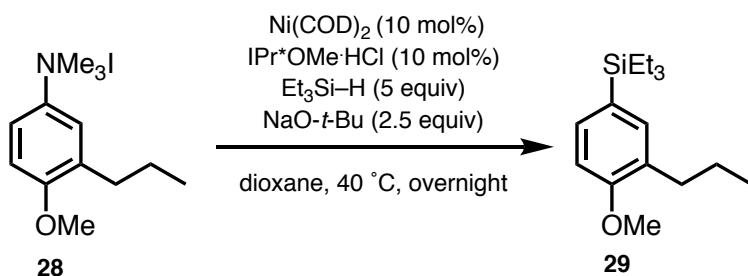

triethyl(4-methoxy-3-propylphenyl)silane (**29**)

The general procedure for silylation was followed using *N,N,N*-trimethylanilinium iodide **28** (67 mg, 0.200 mmol) and triethylsilane (160 μL, 1 mmol). Purification by flash chromatography (100% hexanes) gave the title compound as a clear oil in 77% yield (41 mg, 0.154 mmol).

**<sup>1</sup>H NMR** (401 MHz, Chloroform-*d*) δ 7.30 (dd, *J* = 8.0, 1.6 Hz, 1H), 7.22 (d, *J* = 1.7 Hz, 1H), 6.85 (d, *J* = 8.1 Hz, 1H), 3.82 (s, 3H), 2.75 – 2.36 (m, 2H), 1.61 (q, *J* = 7.5 Hz, 2H), 1.11 – 0.87 (m, 9H), 0.76 (q, *J* = 7.9 Hz, 3H).

**<sup>13</sup>C NMR** (126 MHz, Chloroform-*d*) δ 158.31, 136.02, 133.28, 130.39, 127.70, 109.84, 55.18, 32.60, 23.20, 14.27, 7.63, 3.72.

**HRMS** (ESI) (*m/z*): [*M*+*Na*] calculated for C<sub>16</sub>H<sub>28</sub>OSi, 287.1802, found, 287.1802.

## IX) Large Scale Silylation

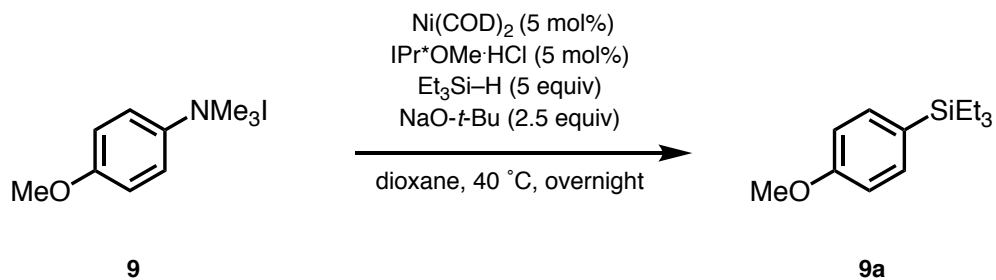

To a 50 mL round bottom was added Ni(COD)<sub>2</sub> (45 mg, 0.16 mmol, 0.05 equiv), *N,N'*-Bis(2,6-bis(diphenylmethyl)-4-methoxyphenyl)imidazolium chloride (IPr\*OMe·HCl) (160 mg, 0.16 mmol, 0.05 equiv), NaO-*t*-Bu (787 mg, 8.17 mmol, 2.5 equiv), and **9** (3.27 mmol, 1 equiv) were combined under inert atmosphere and suspended in 15 mL of dioxane at rt. Silane (2.61 mL, 16.35 mmol, 5 equiv) was added and the vial was sealed with a Teflon cap before removing from the glovebox to heat to 40 °C overnight. Upon completion, the reaction mixture was filtered through Celite with DCM, the solvent was removed by rotary evaporation, and the crude reaction mixture was purified by silica gel chromatography (100% hexanes to 95:5 hexanes/ EtOAc) to give the title compound as a clear oil in 78% yield (569 mg, 2.55 mmol).

## X) NMR Spectra

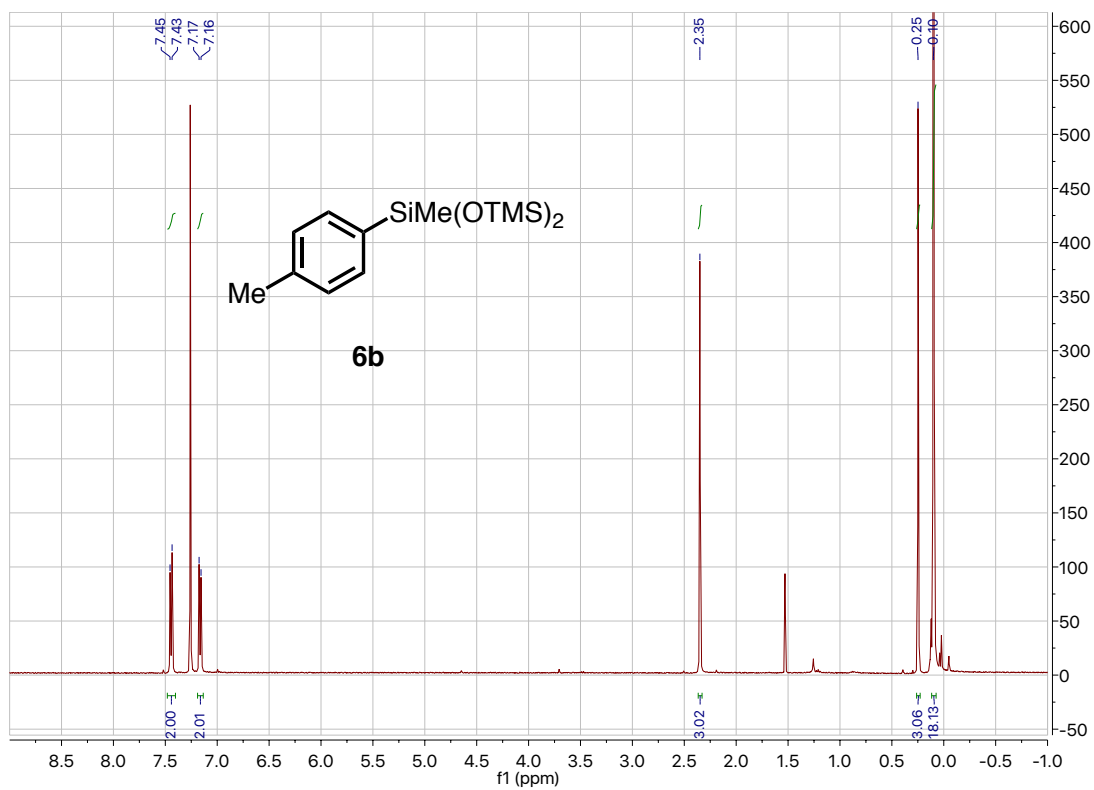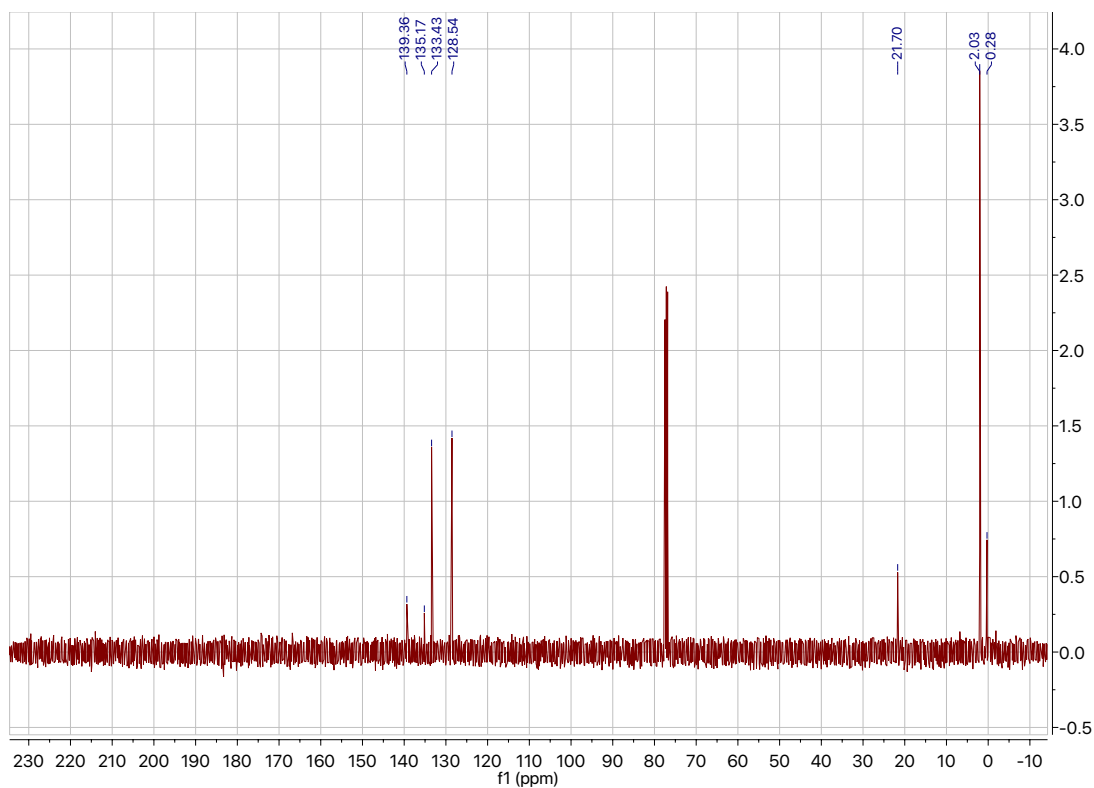

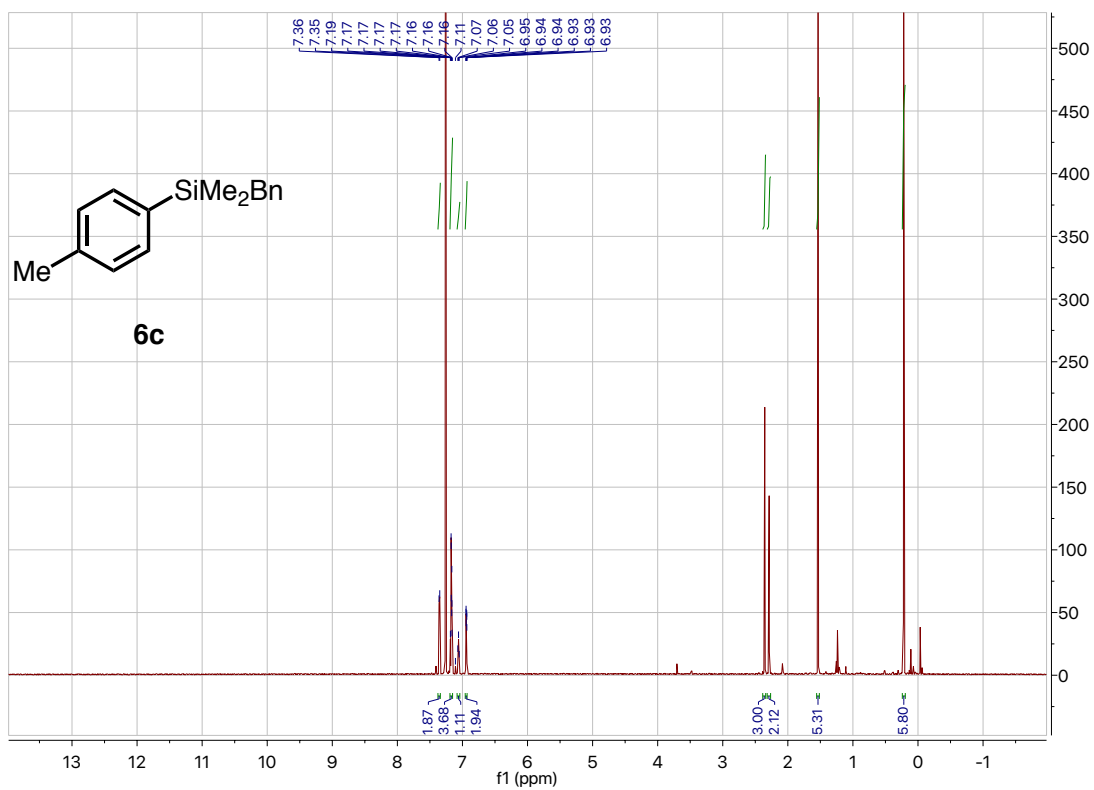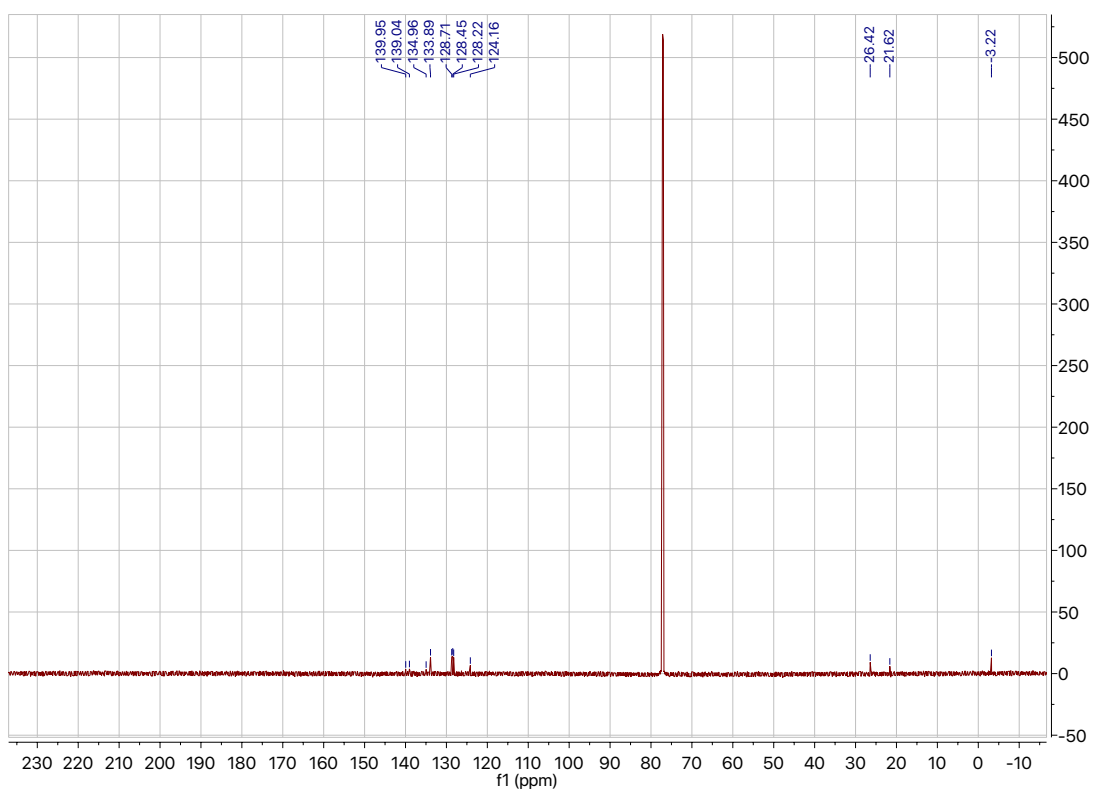

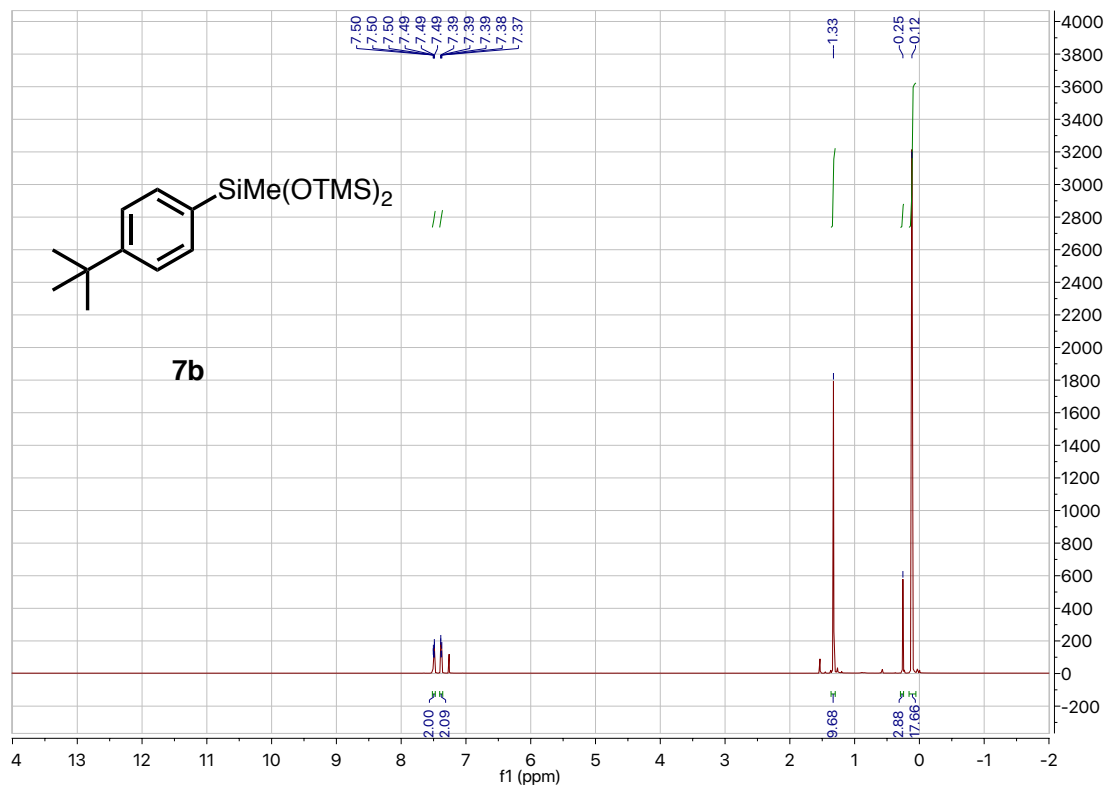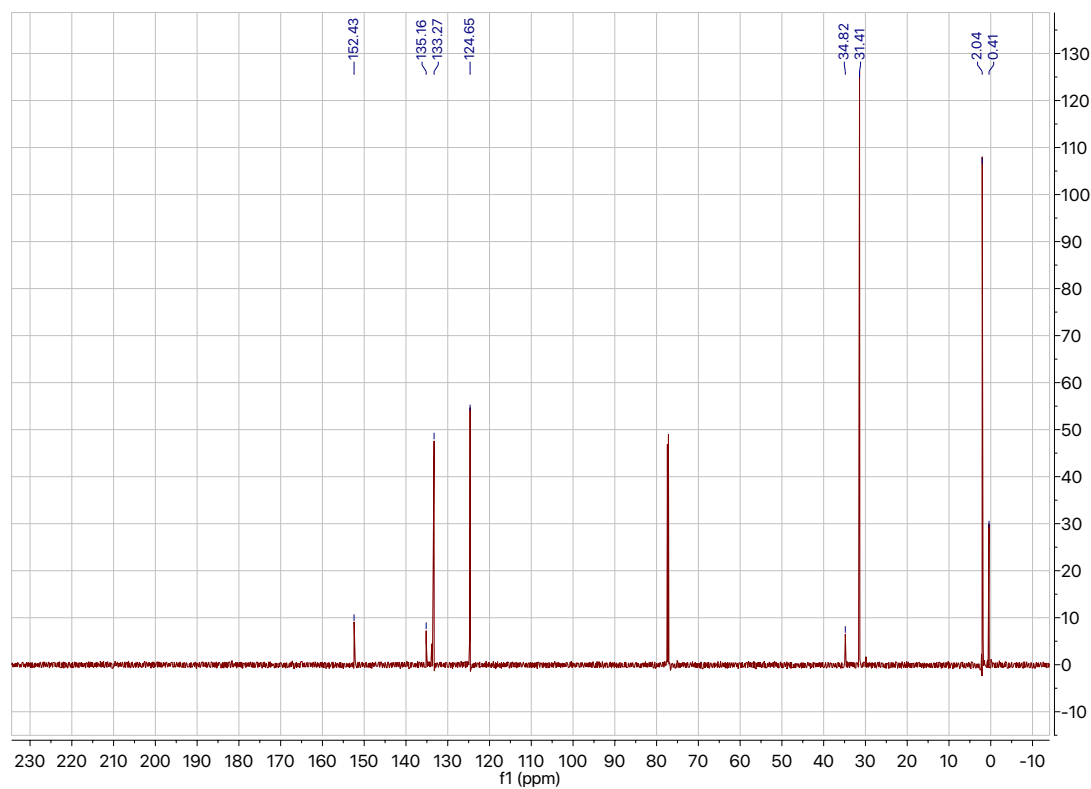

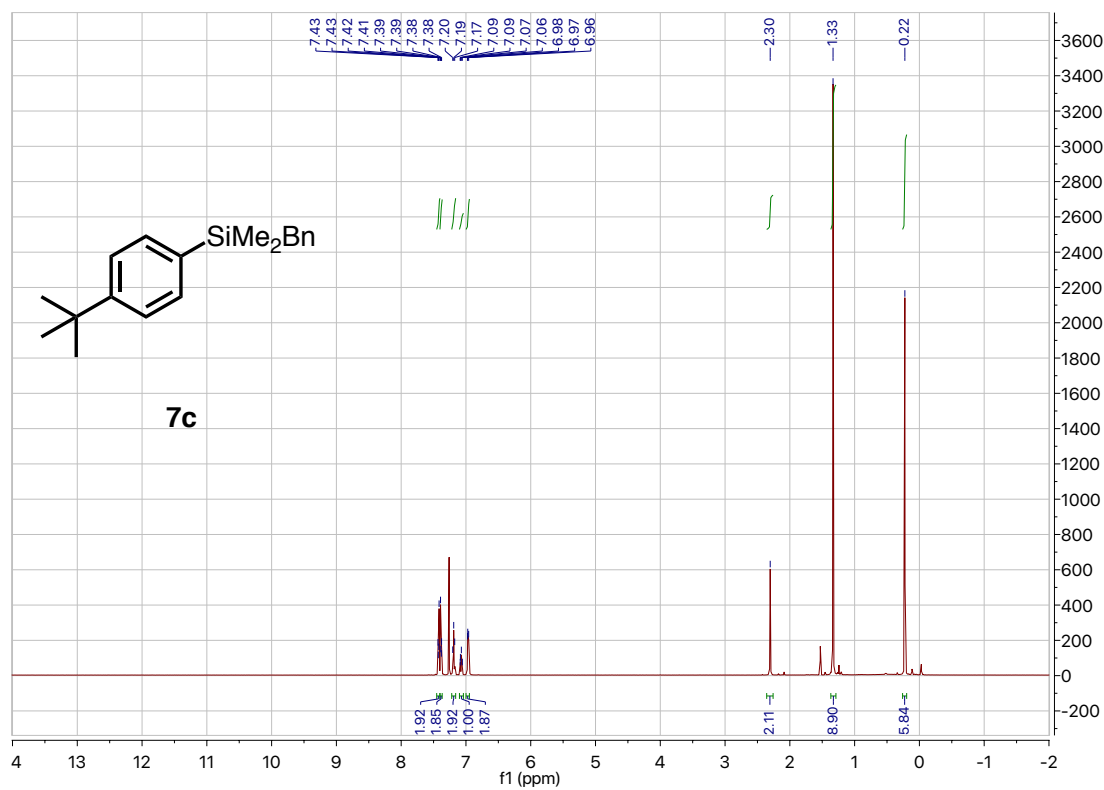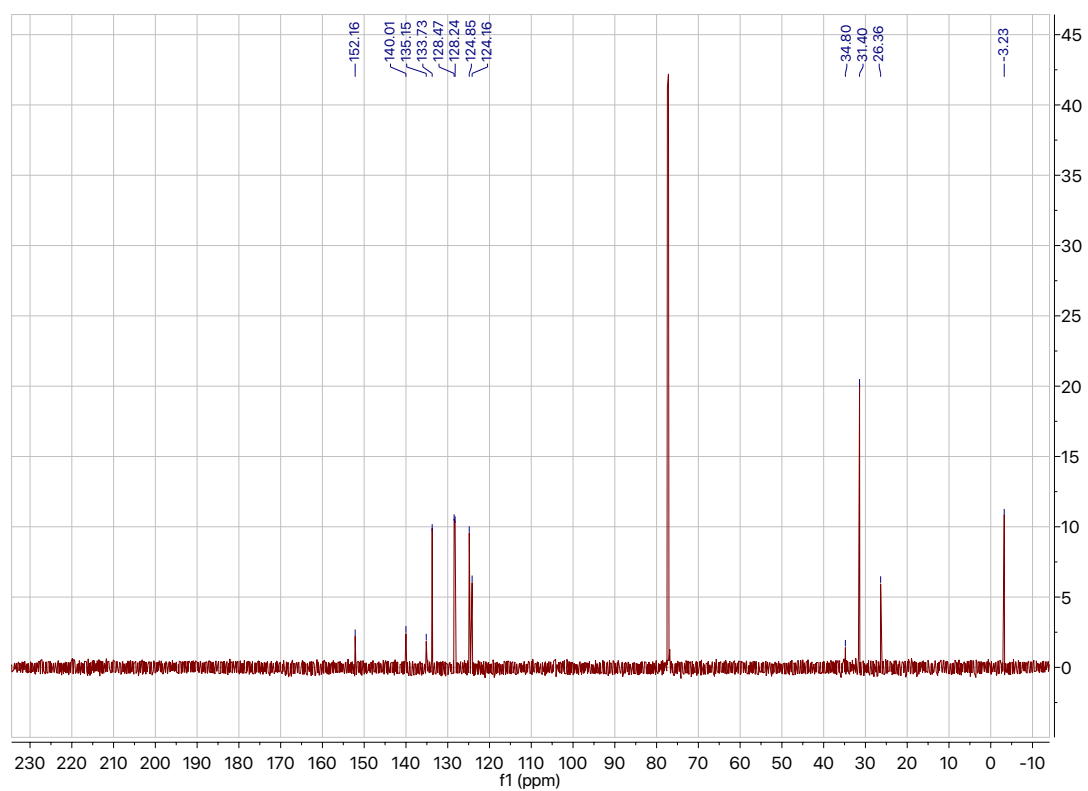

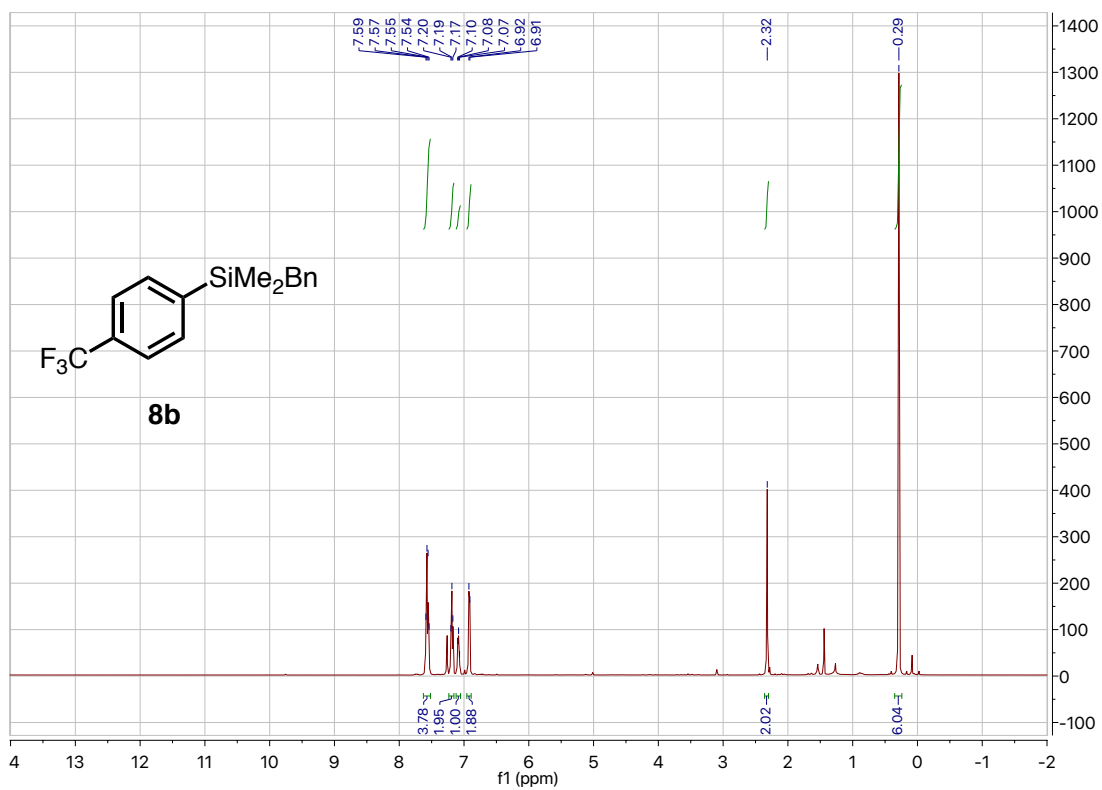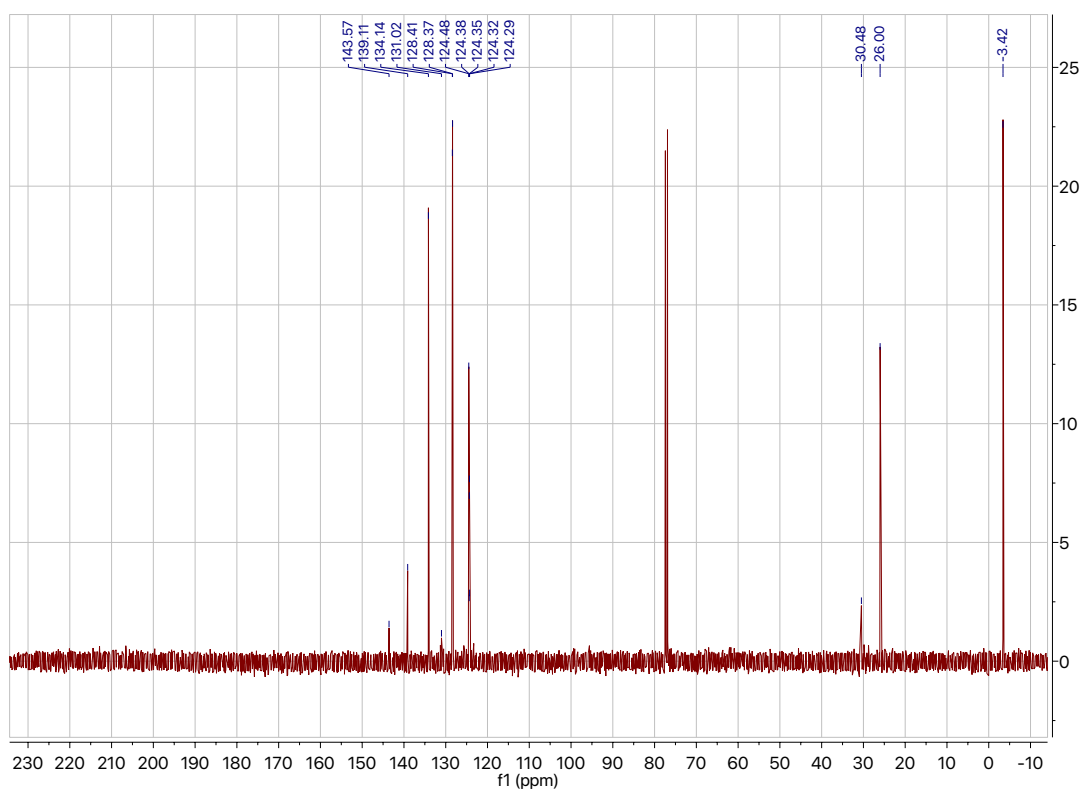



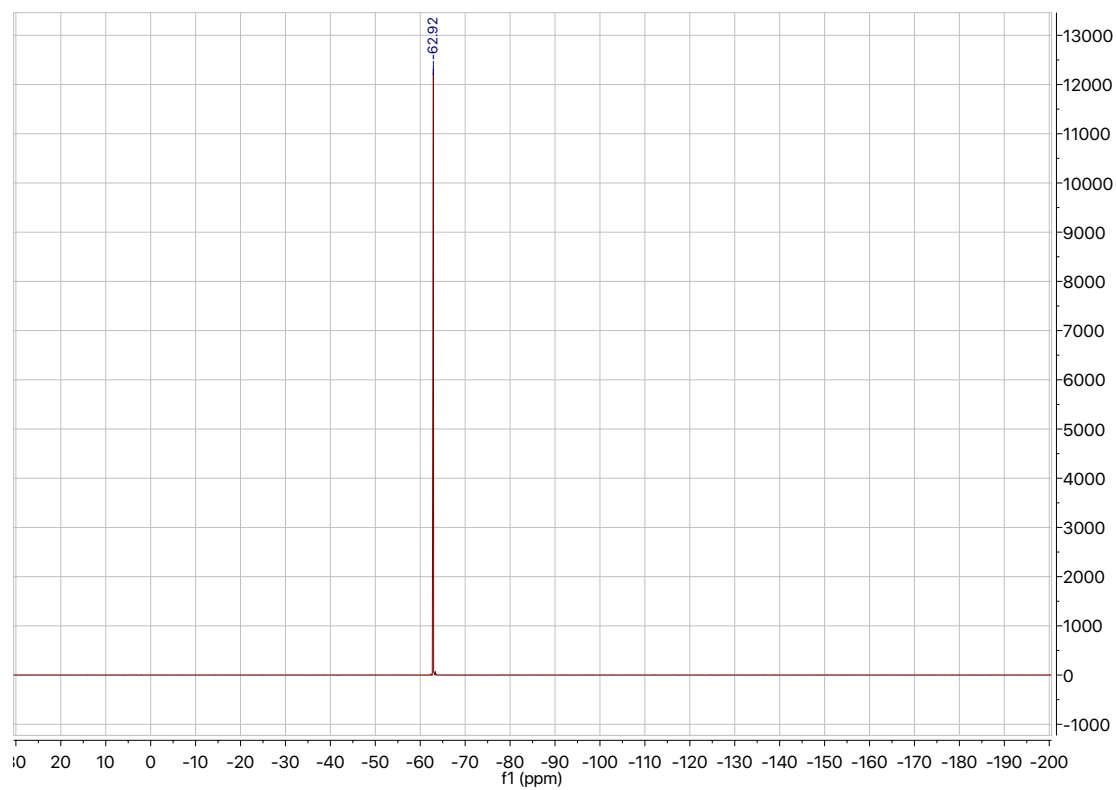

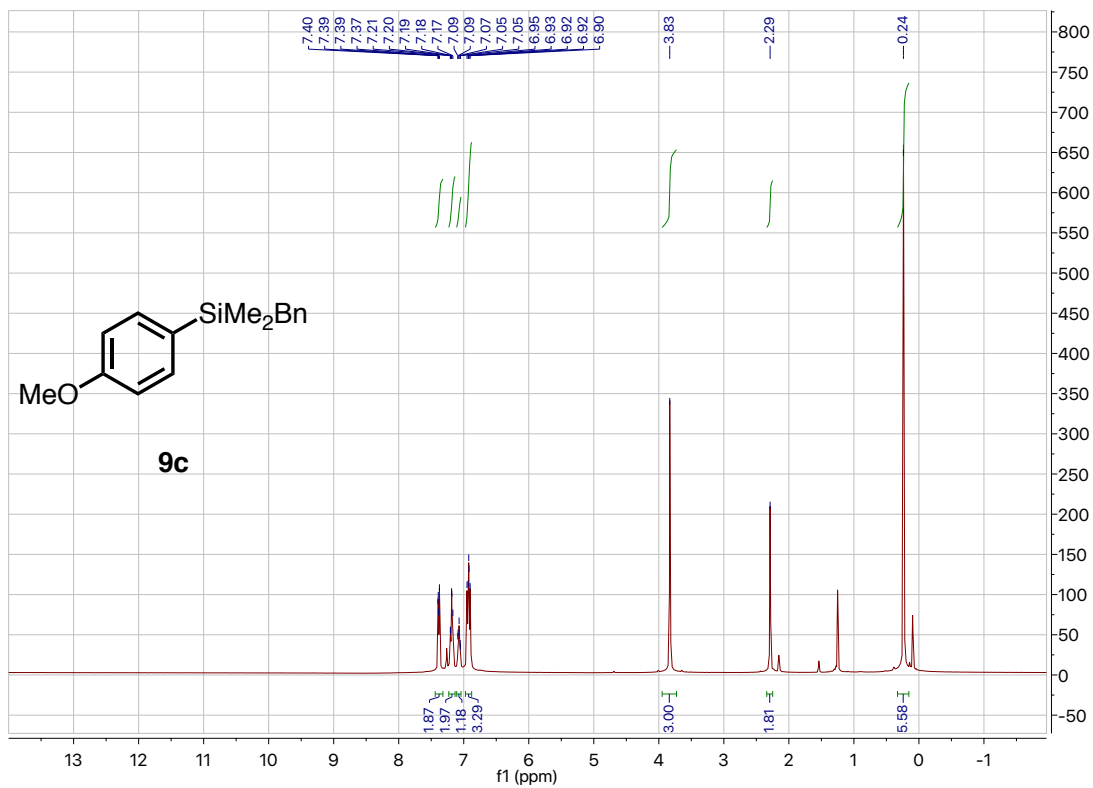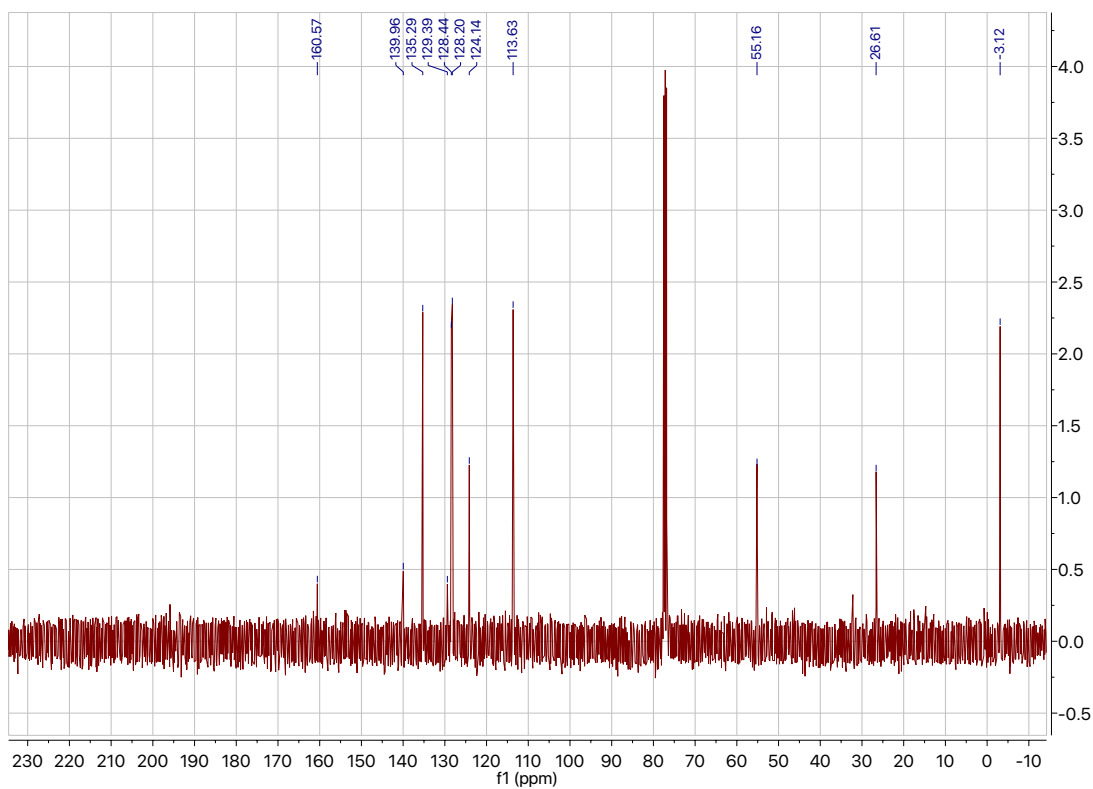

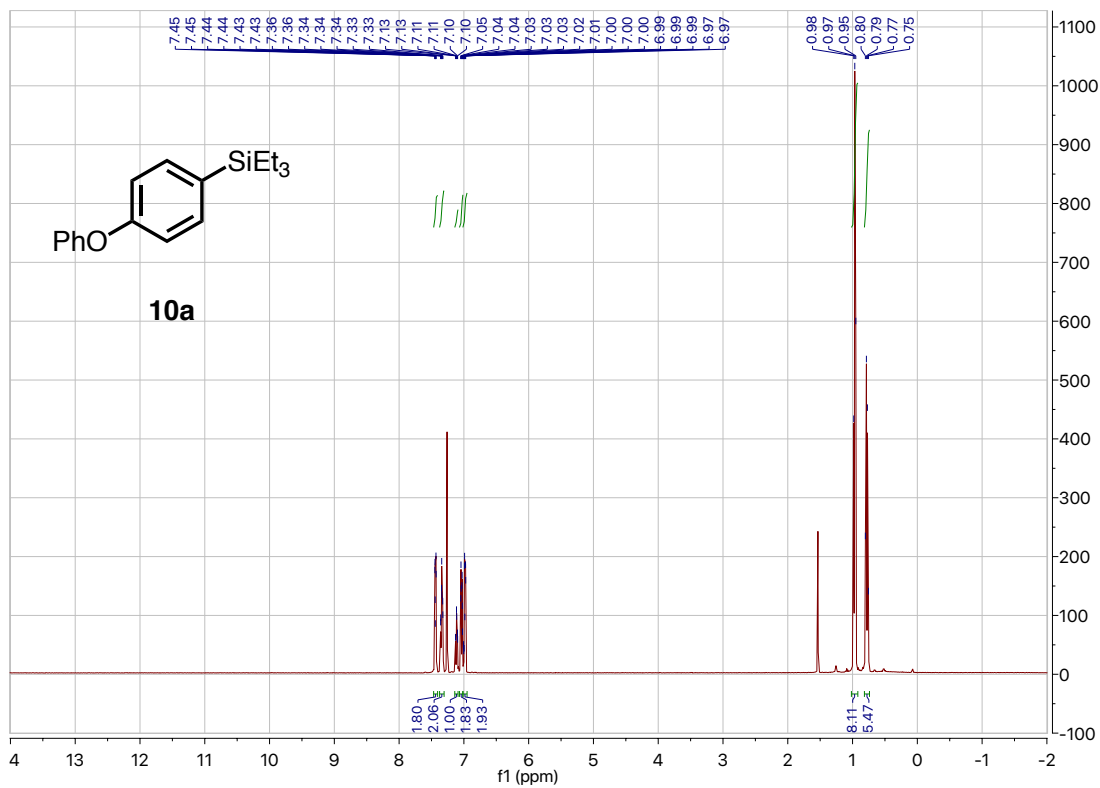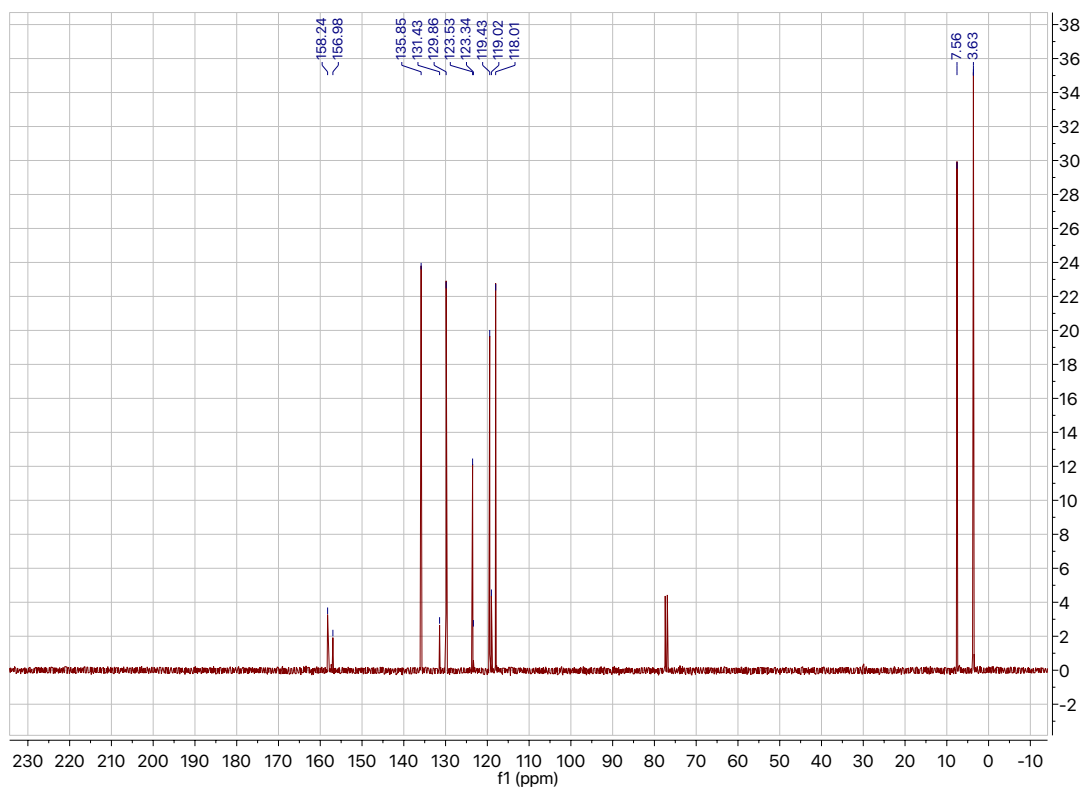

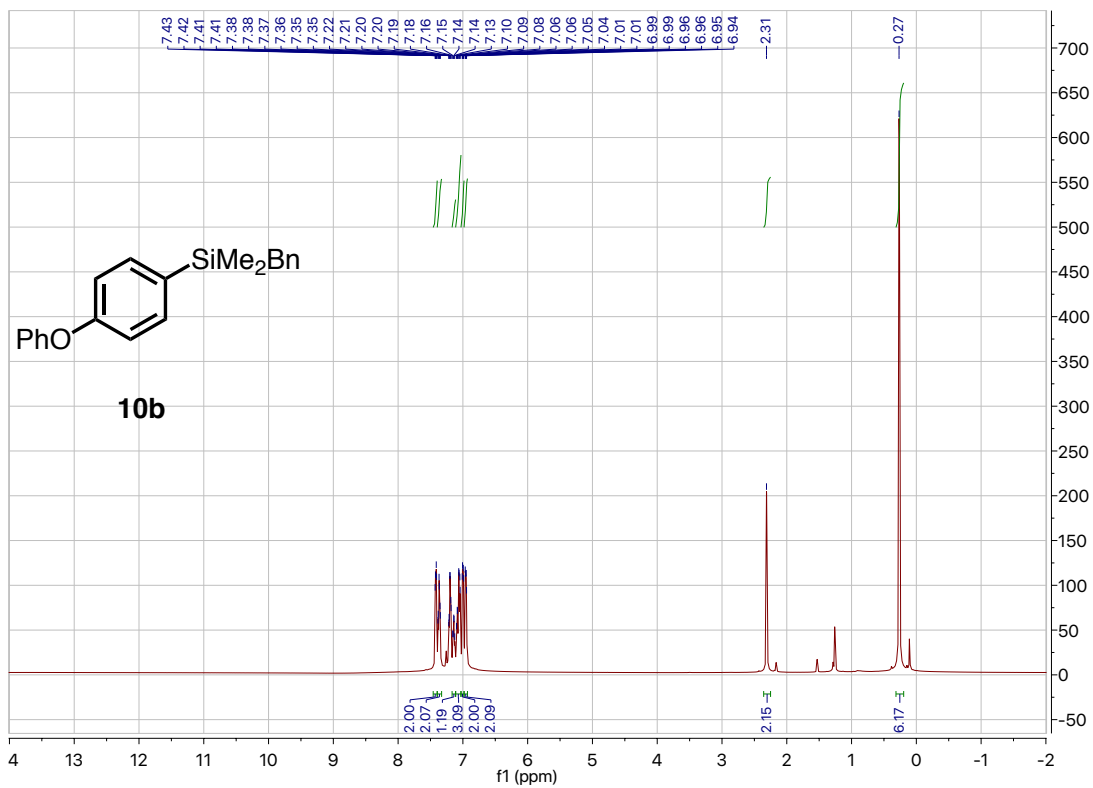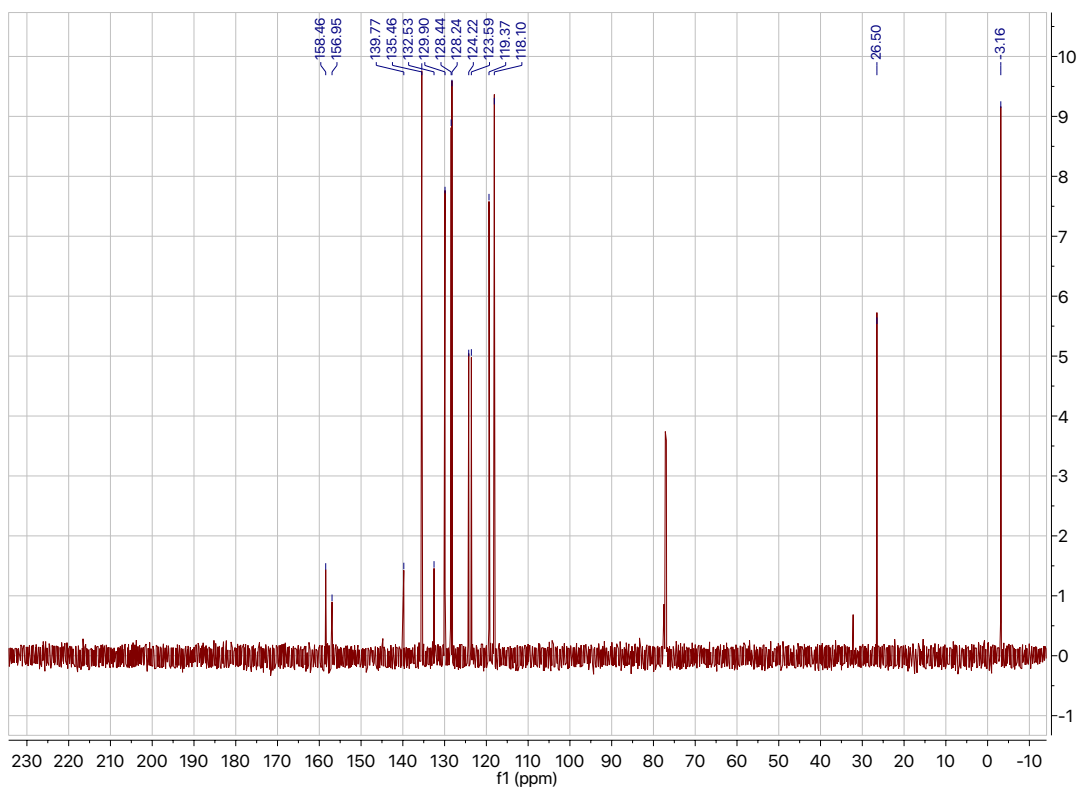

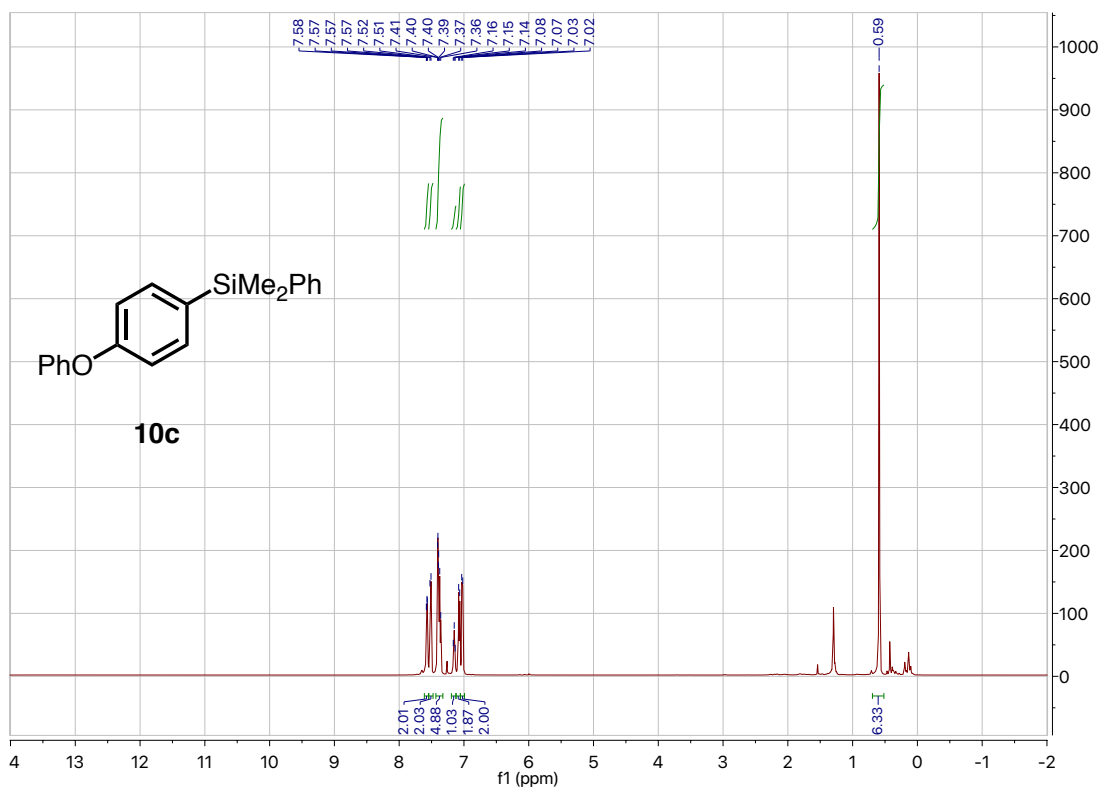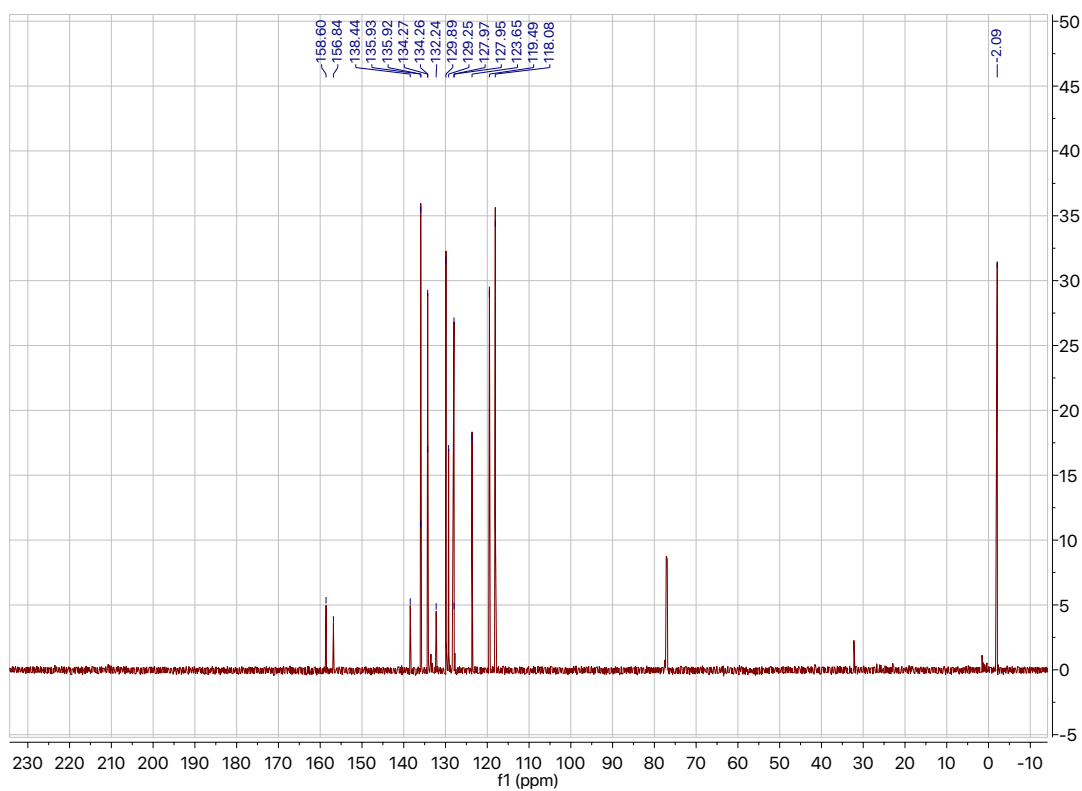

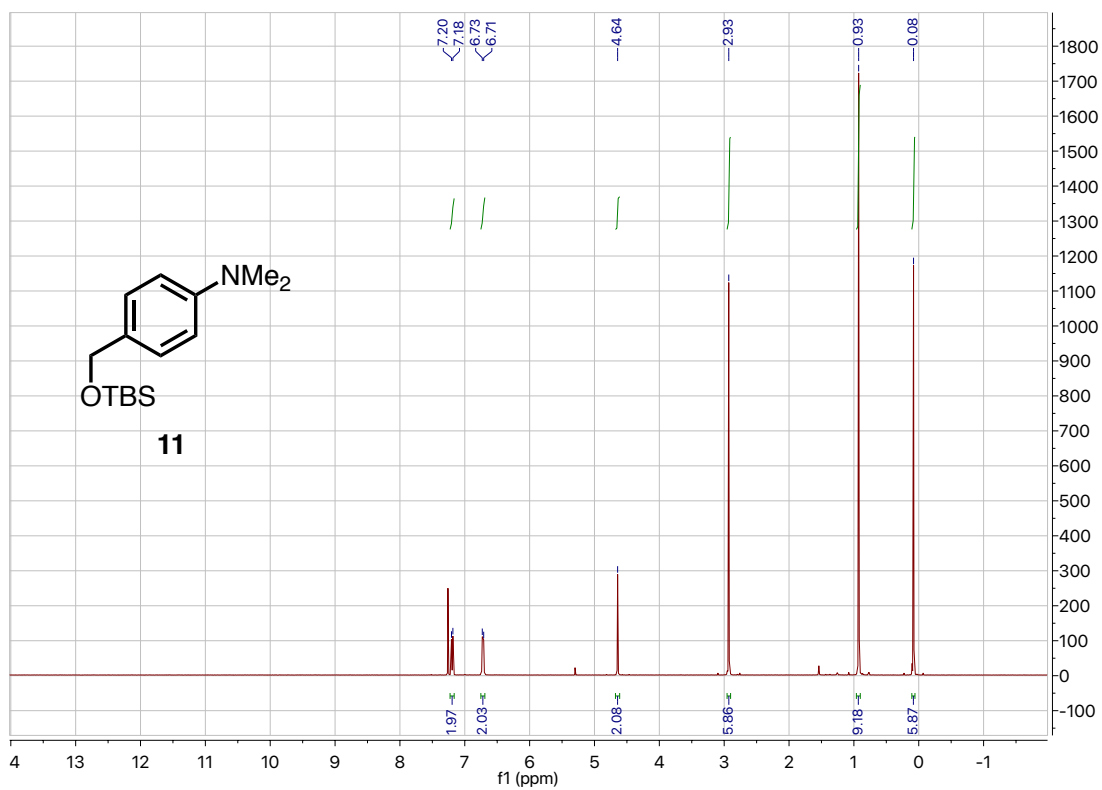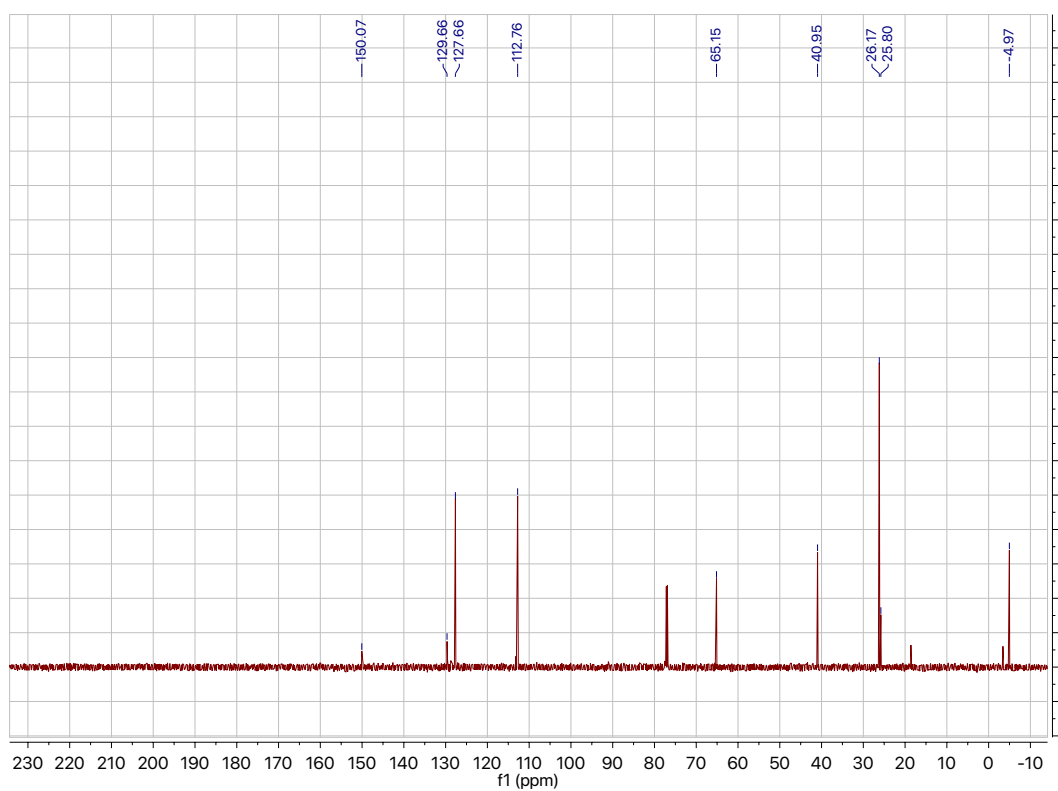

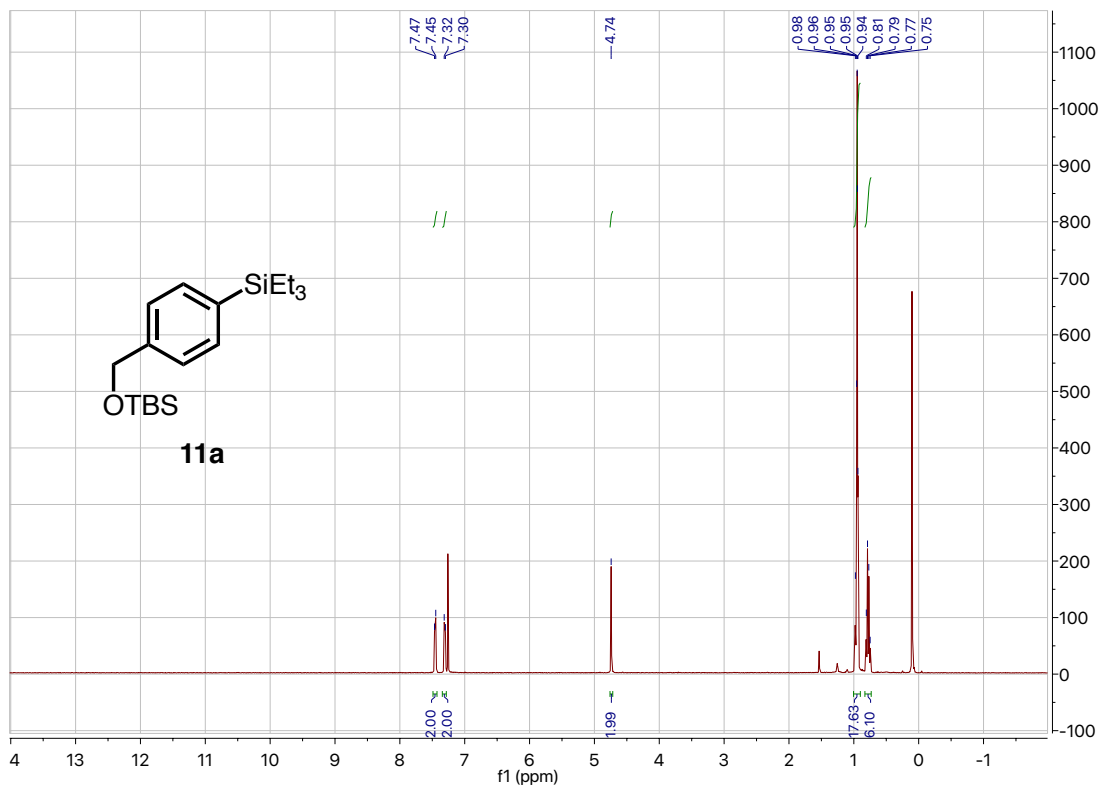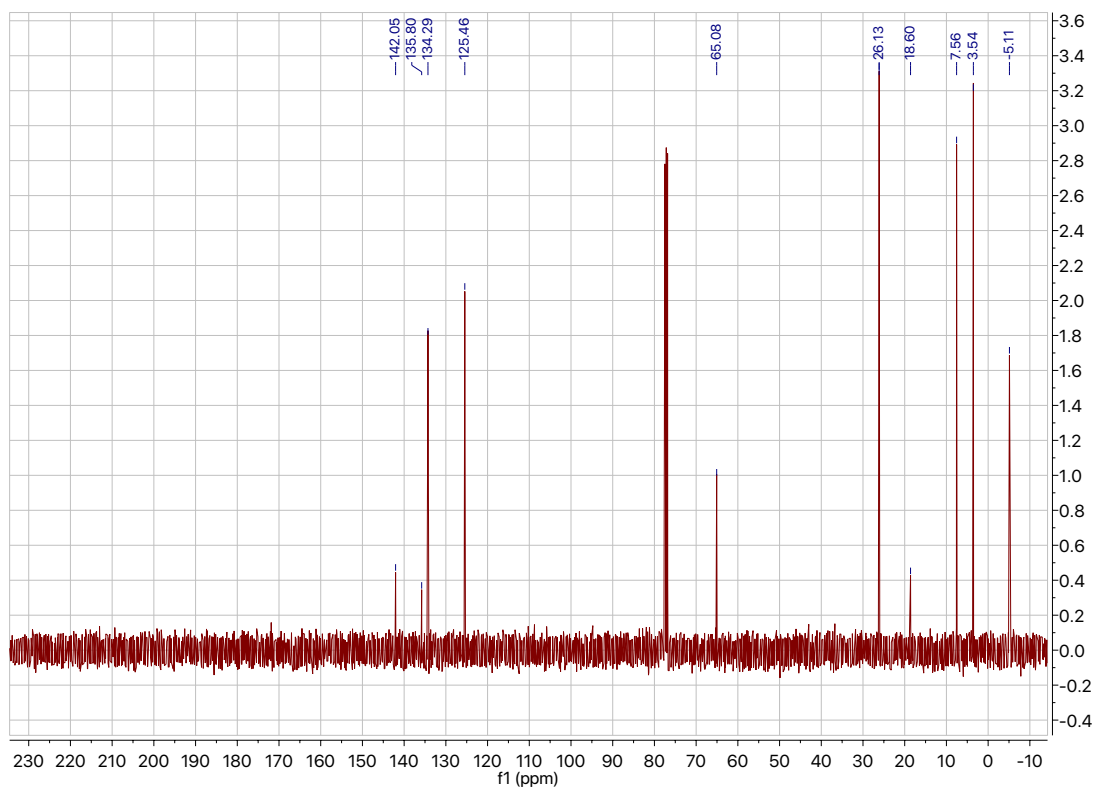





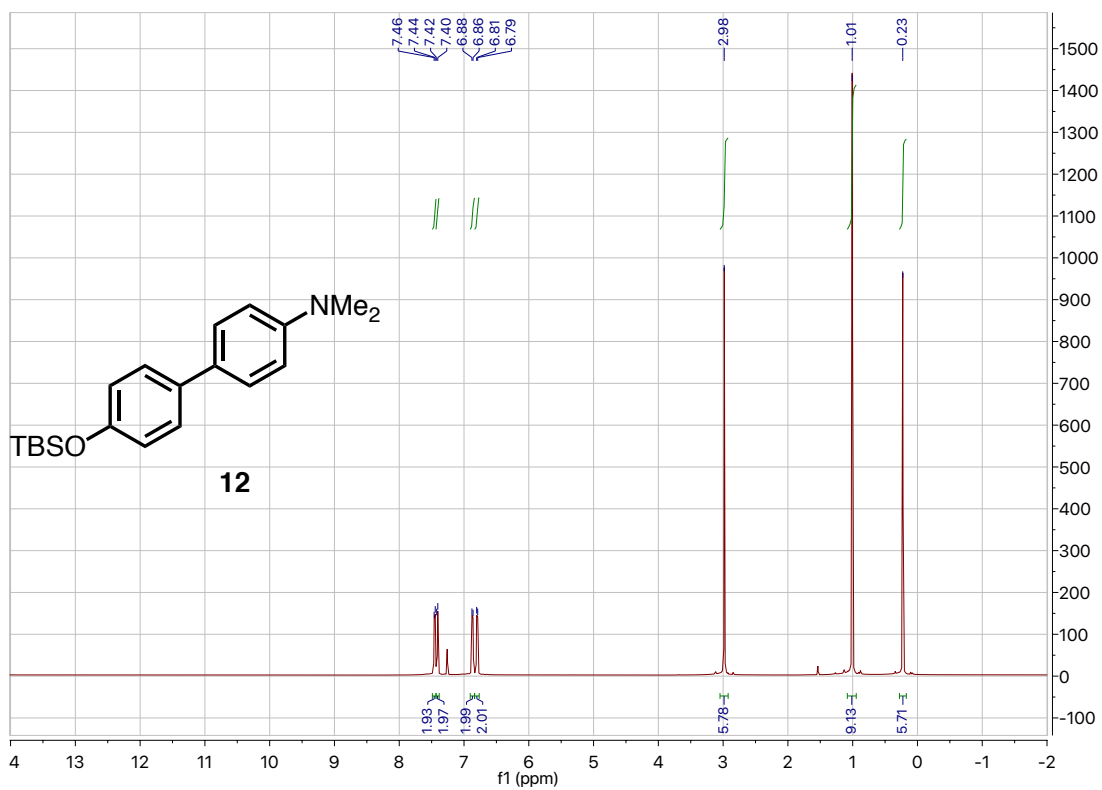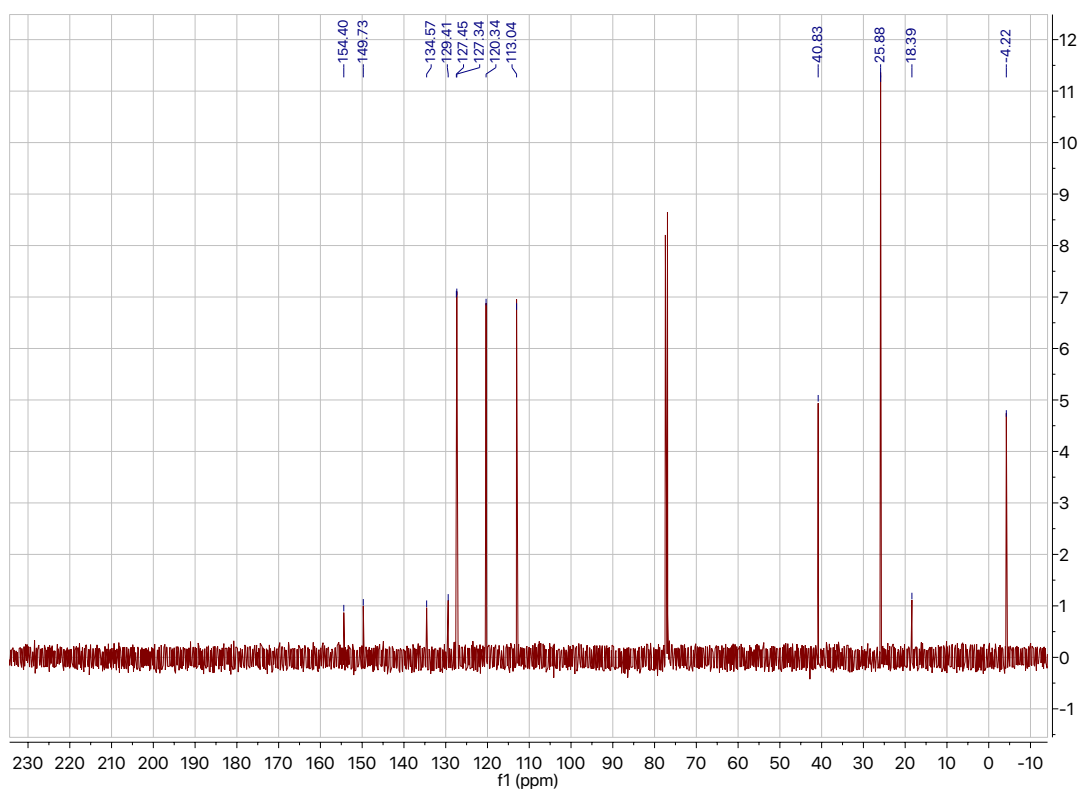

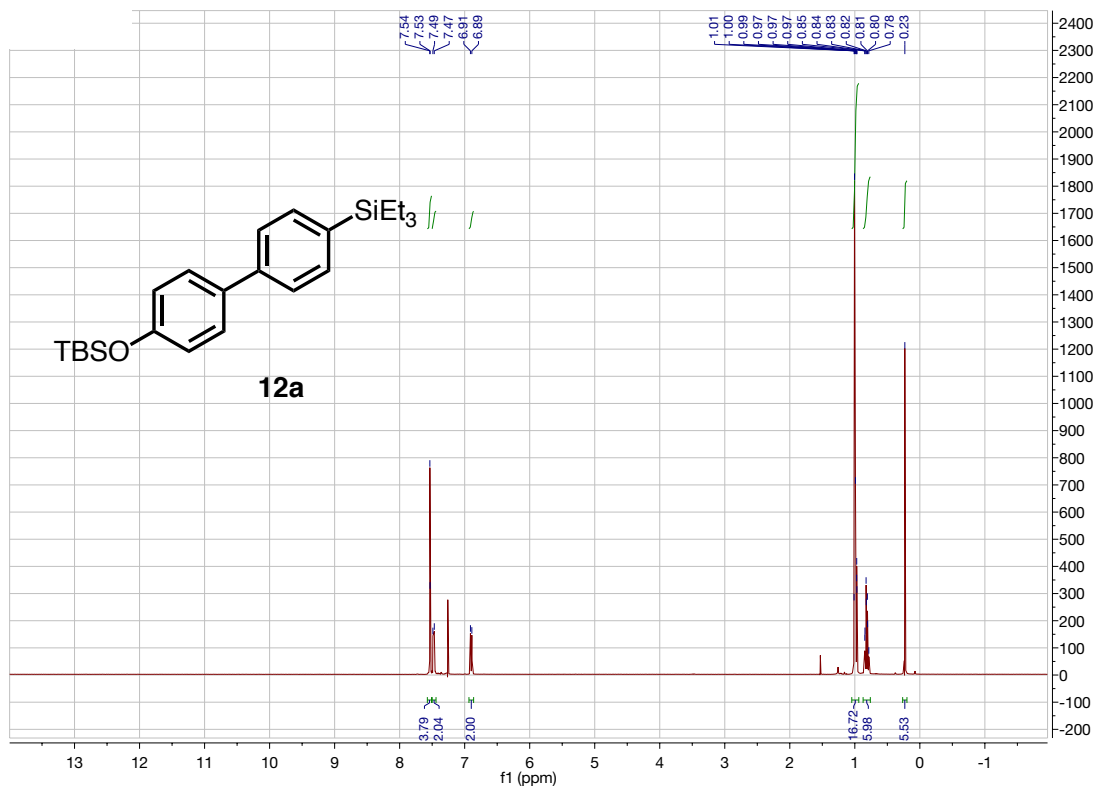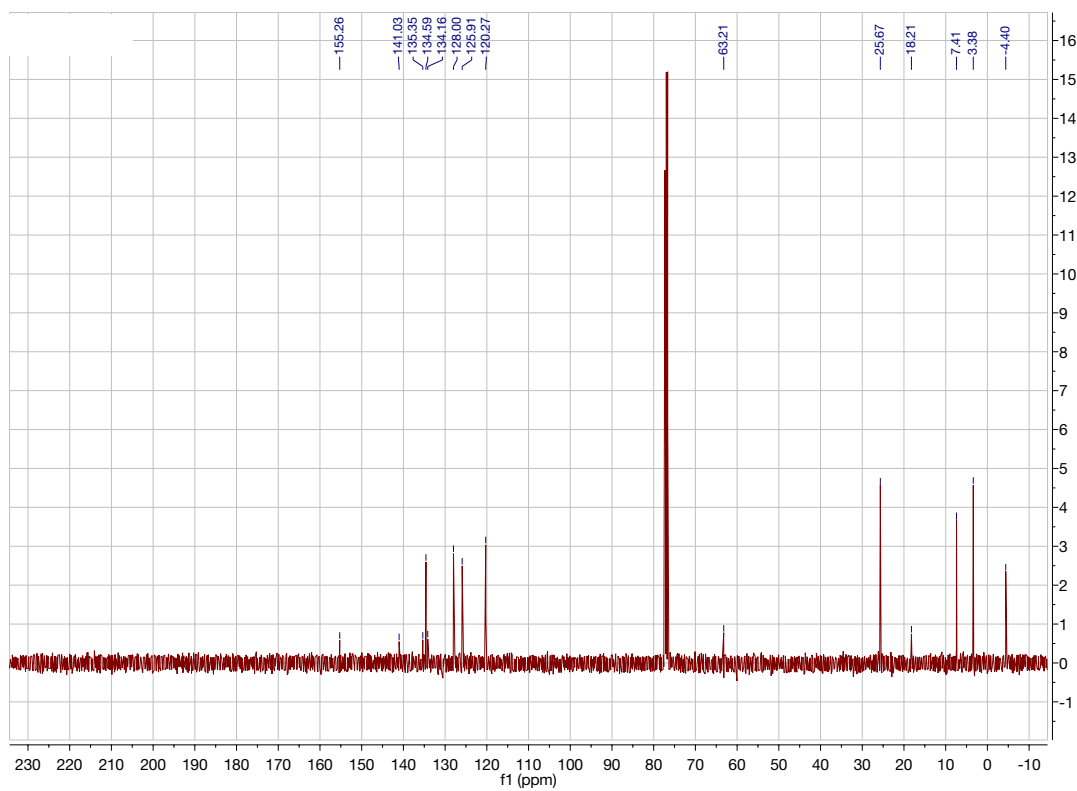

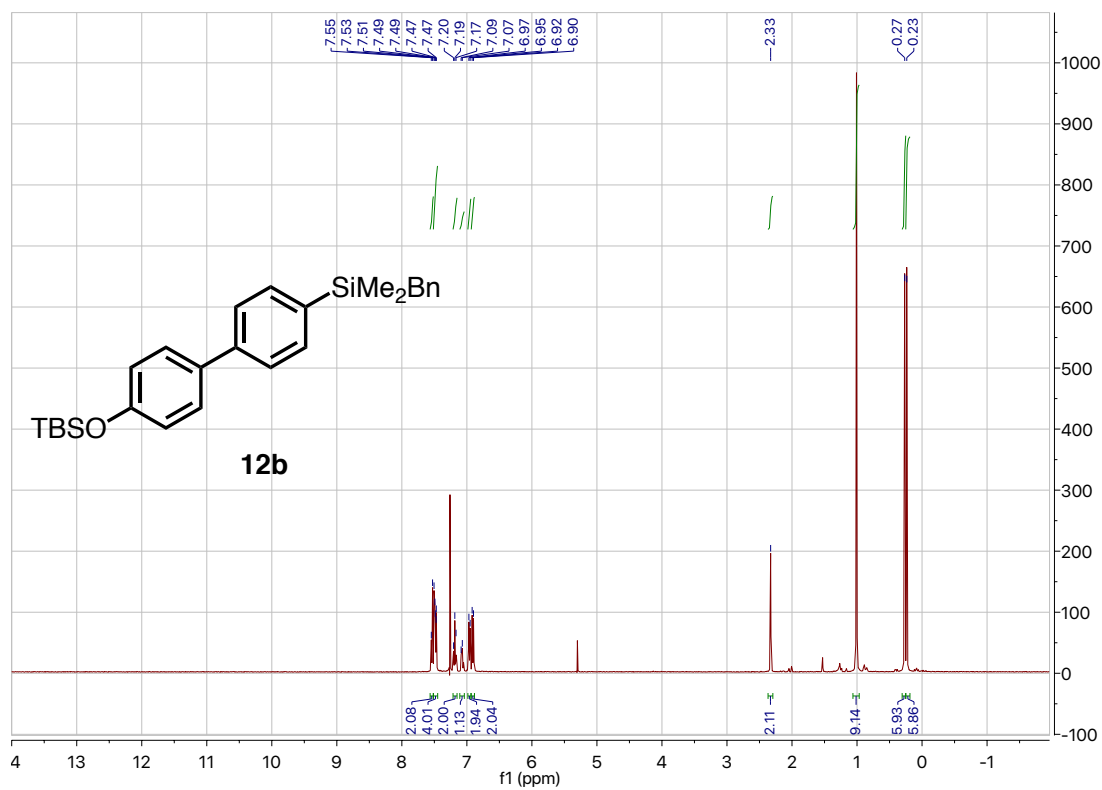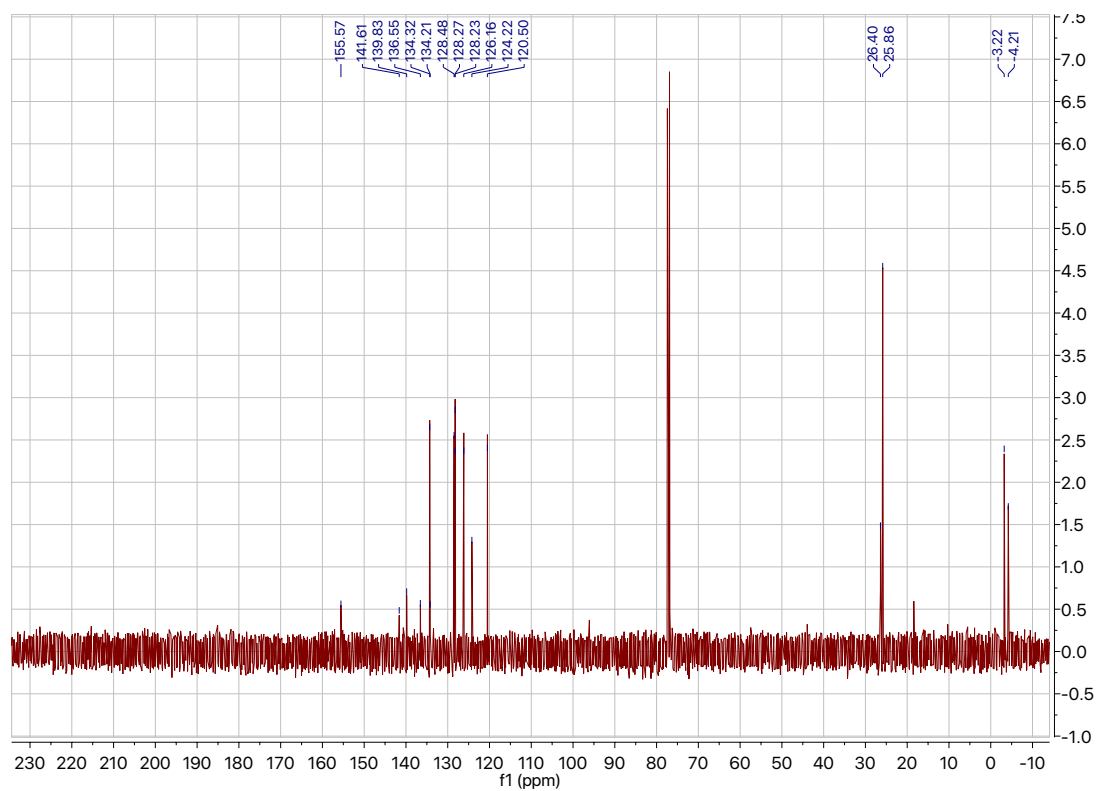

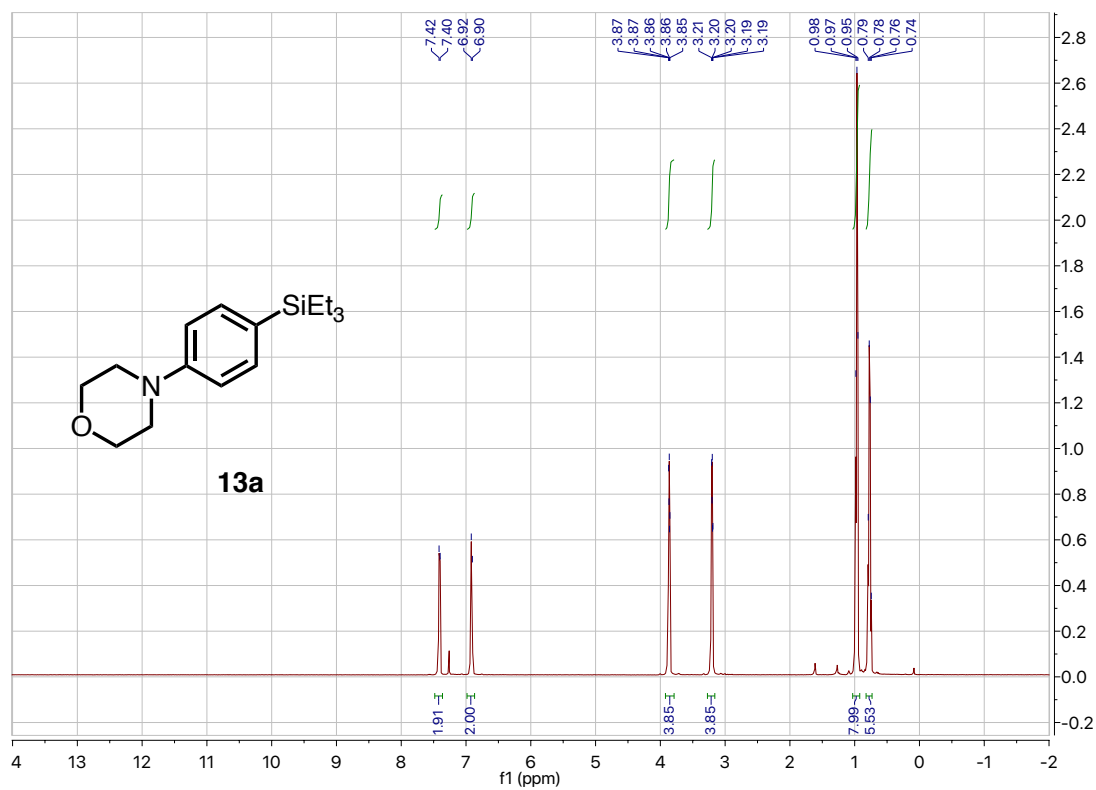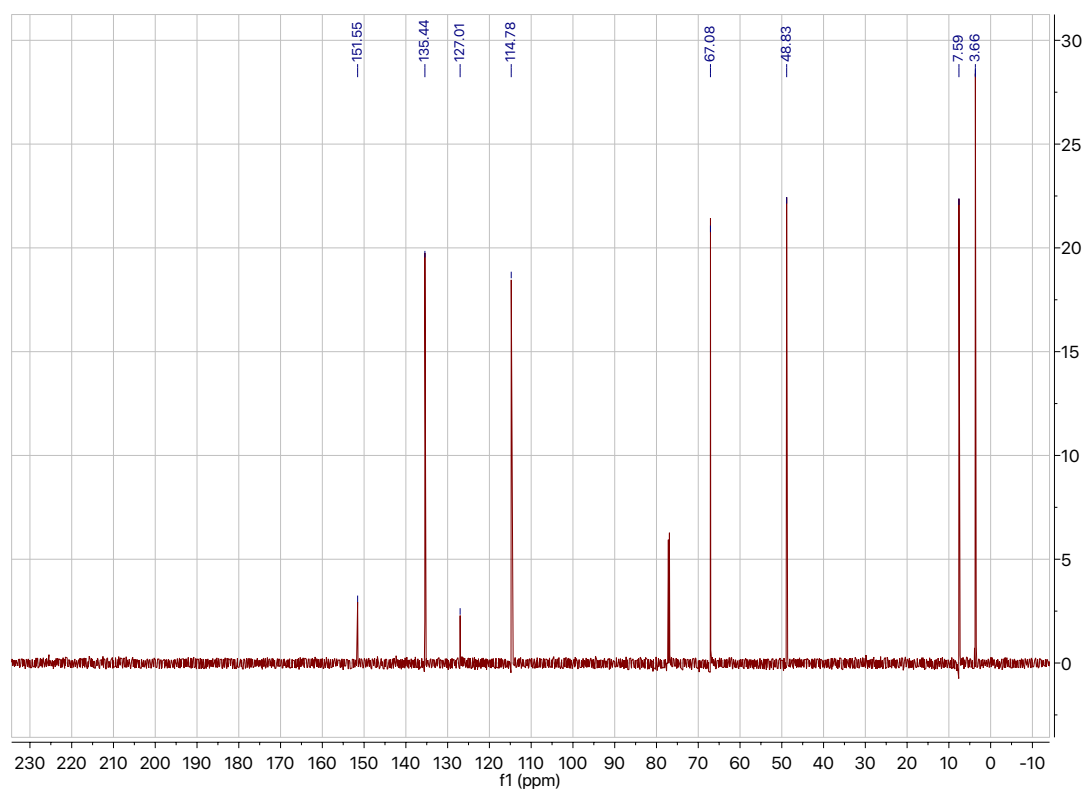

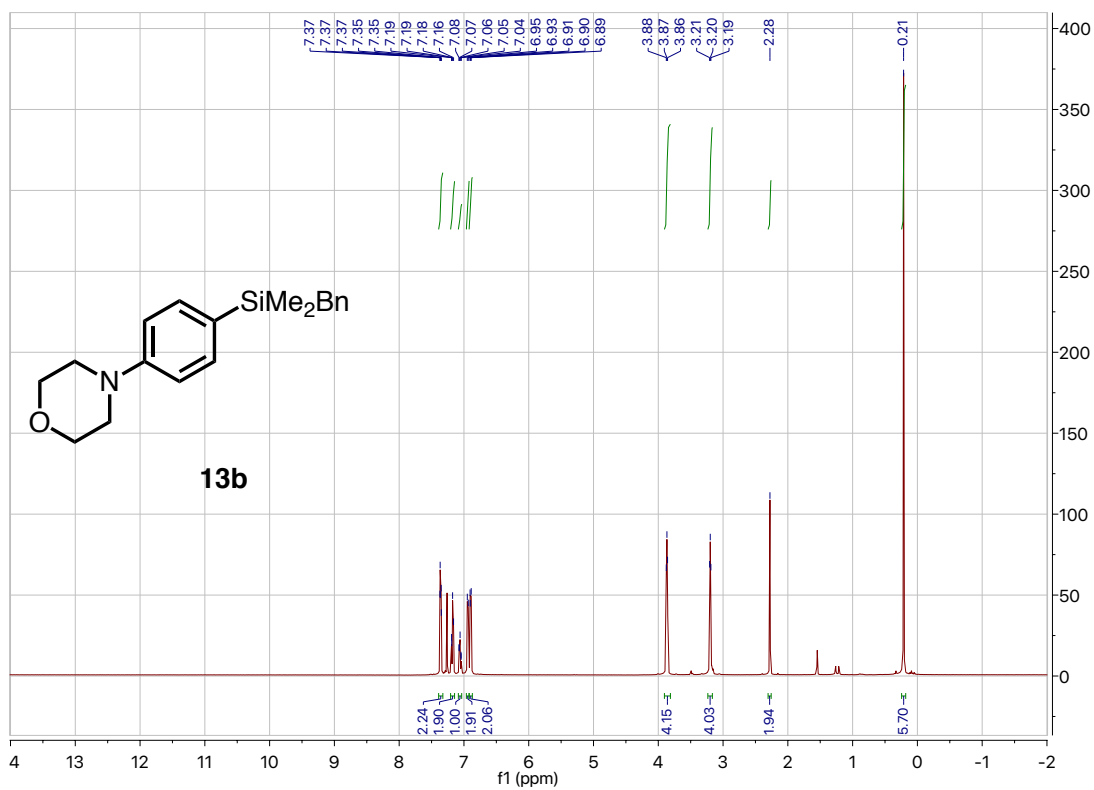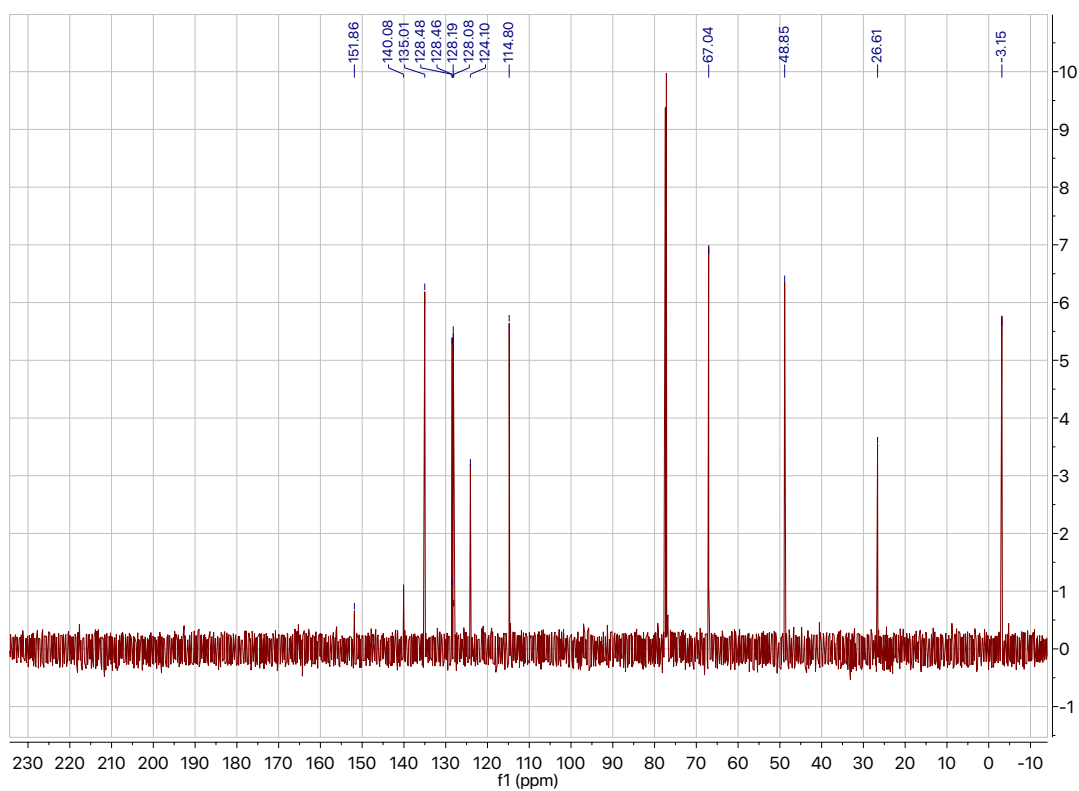

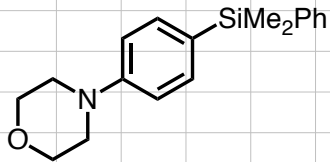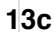

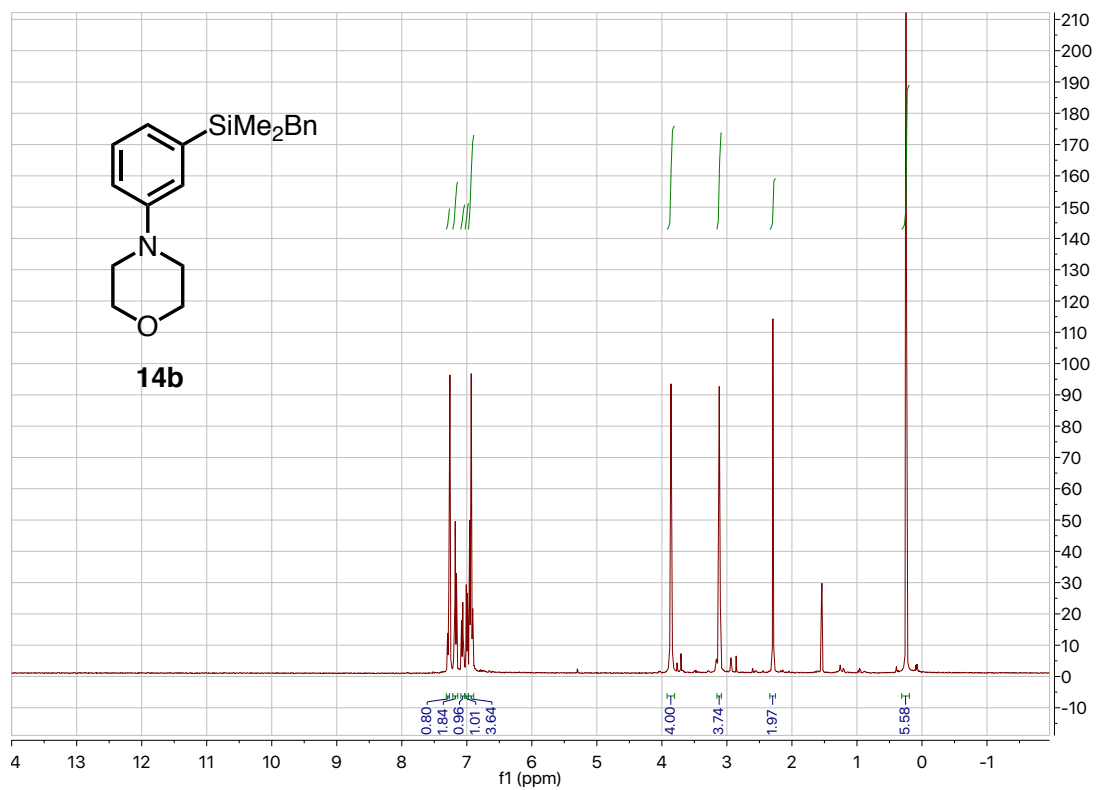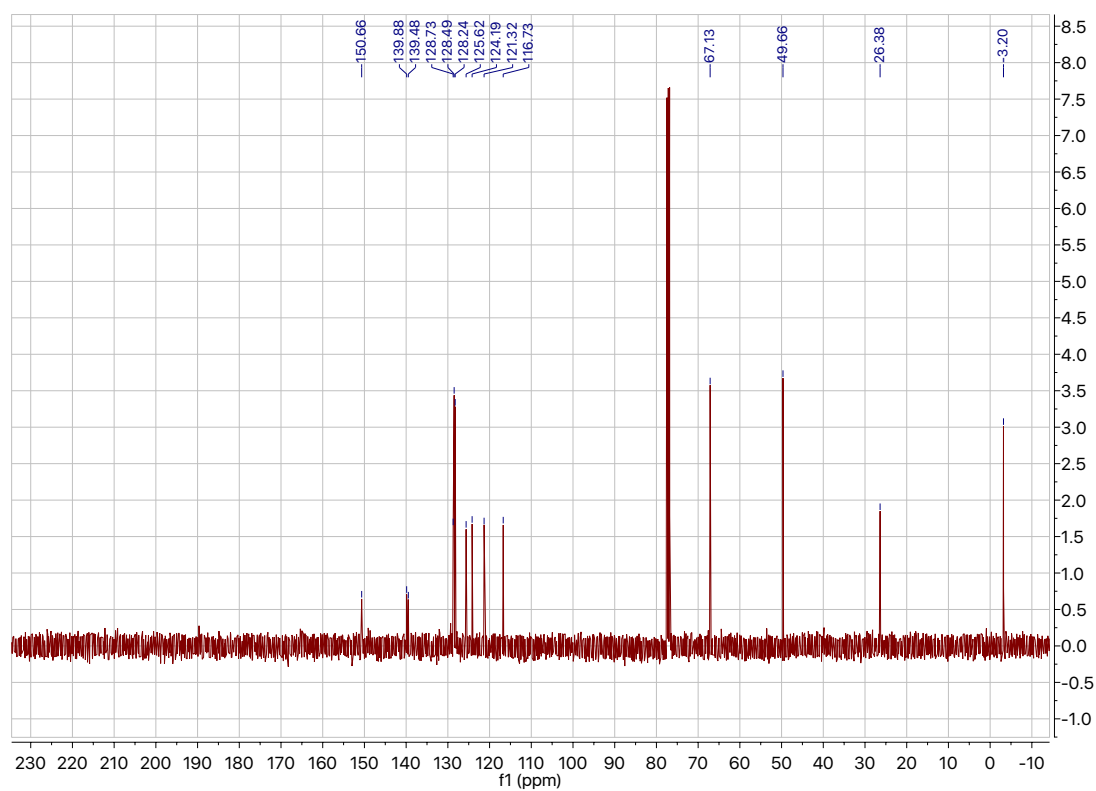

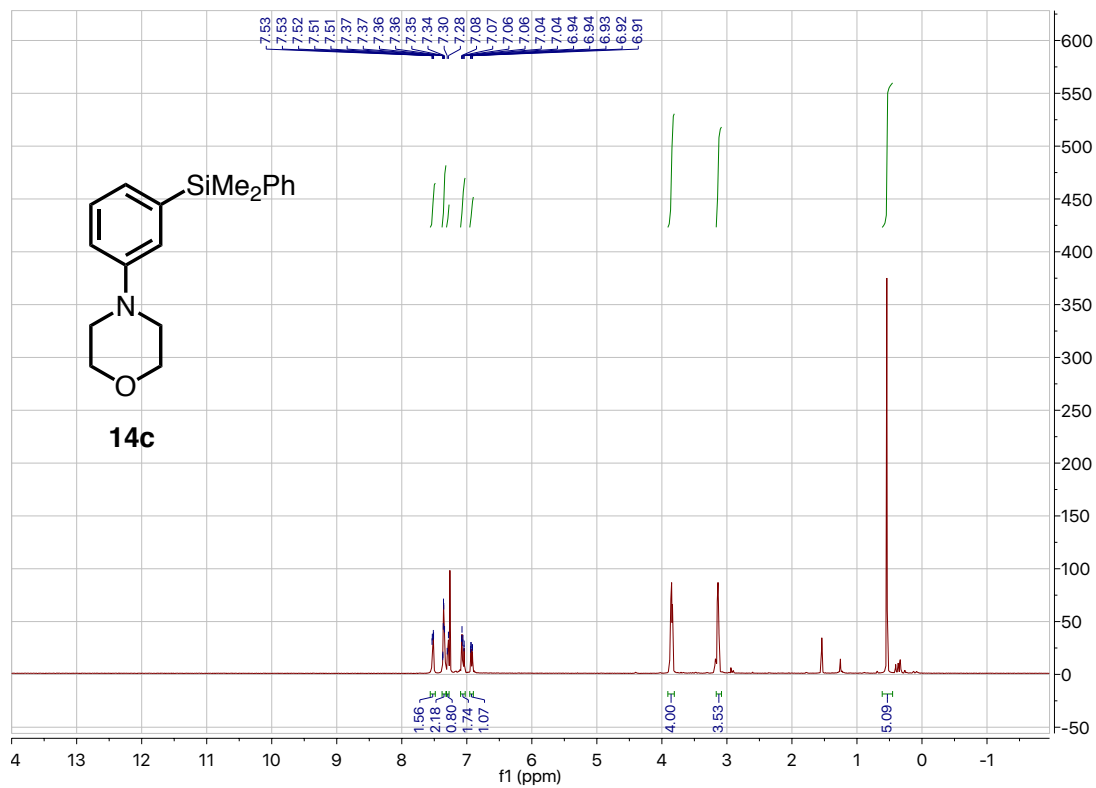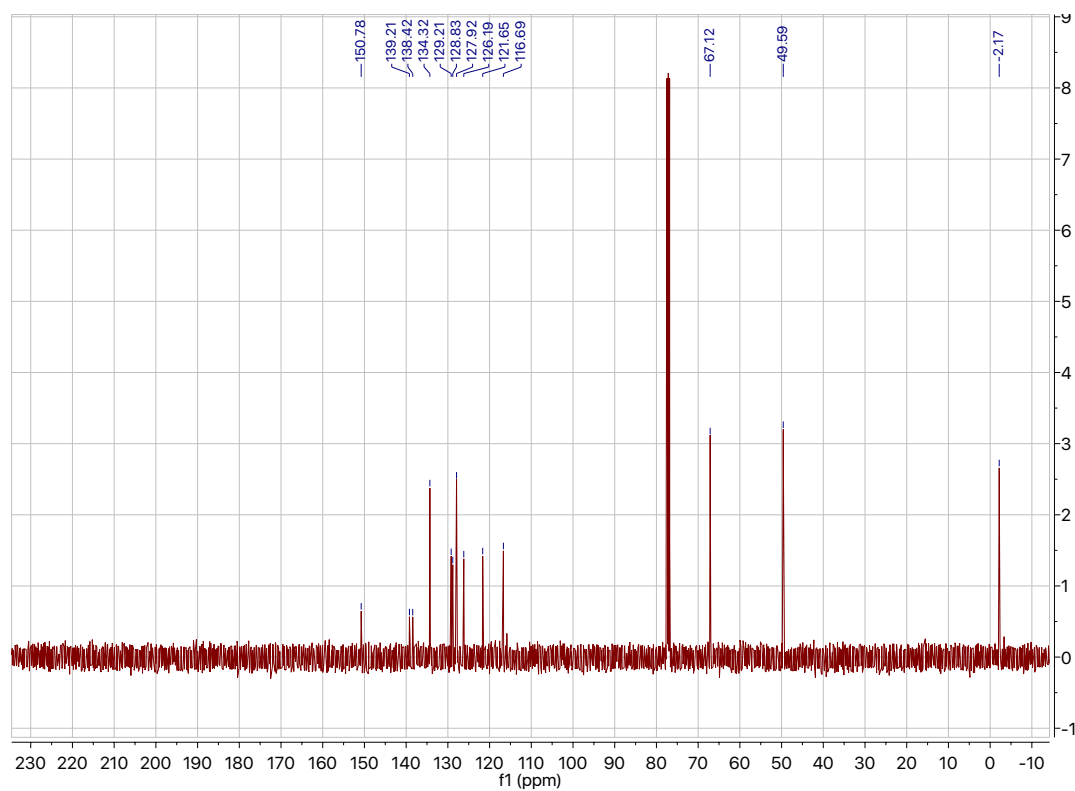



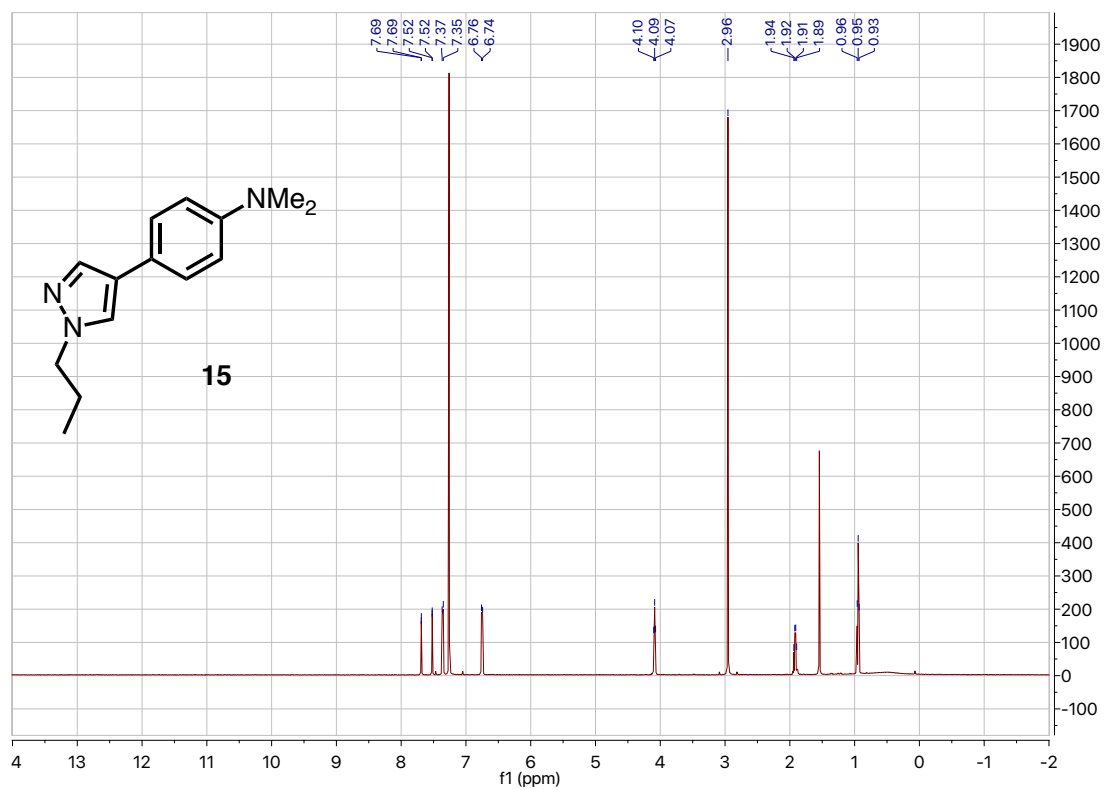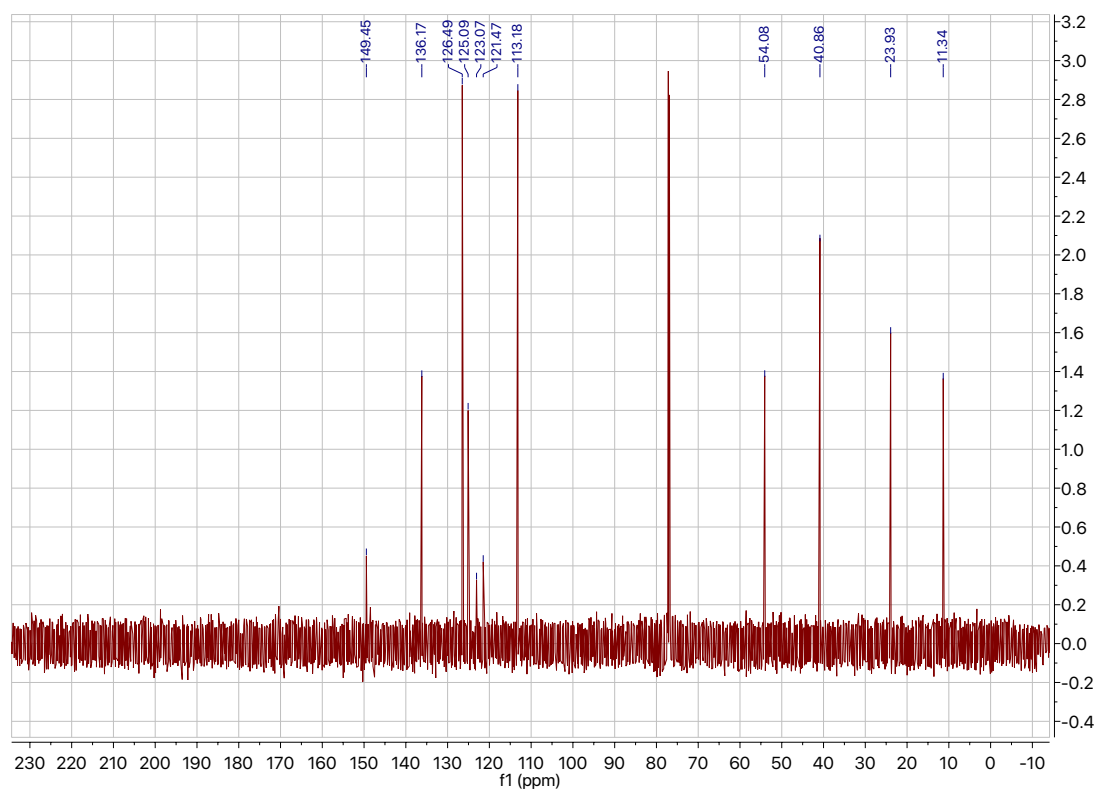

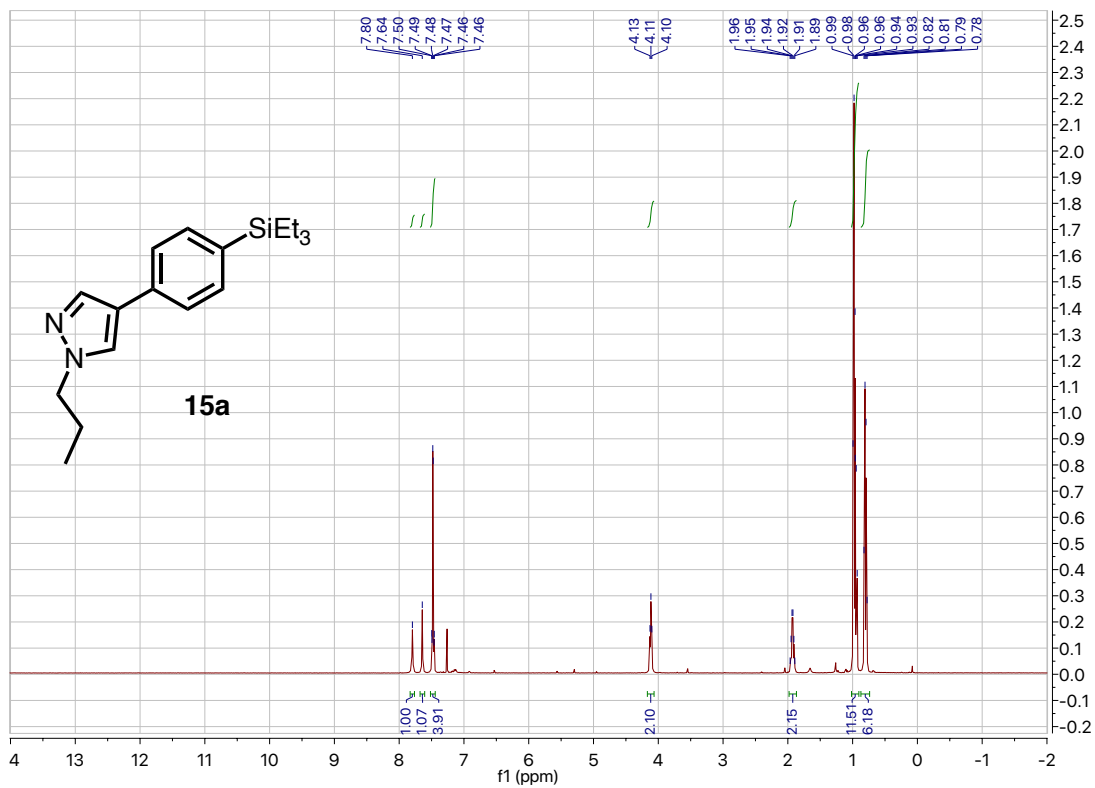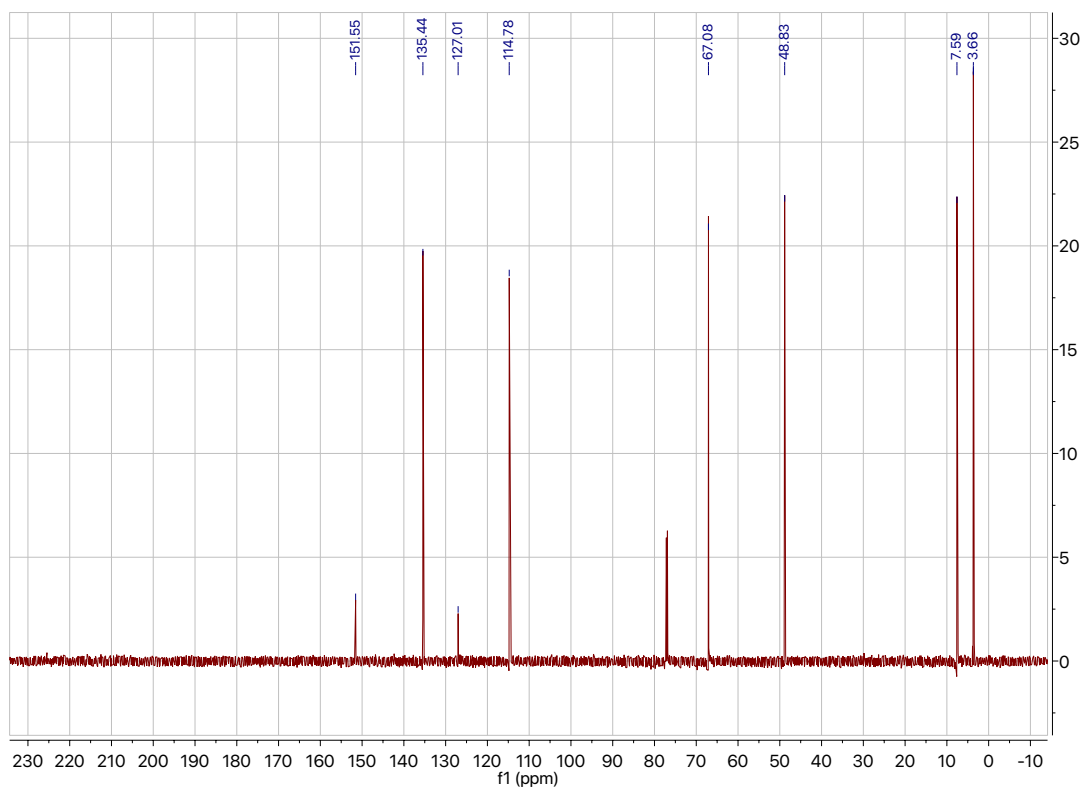

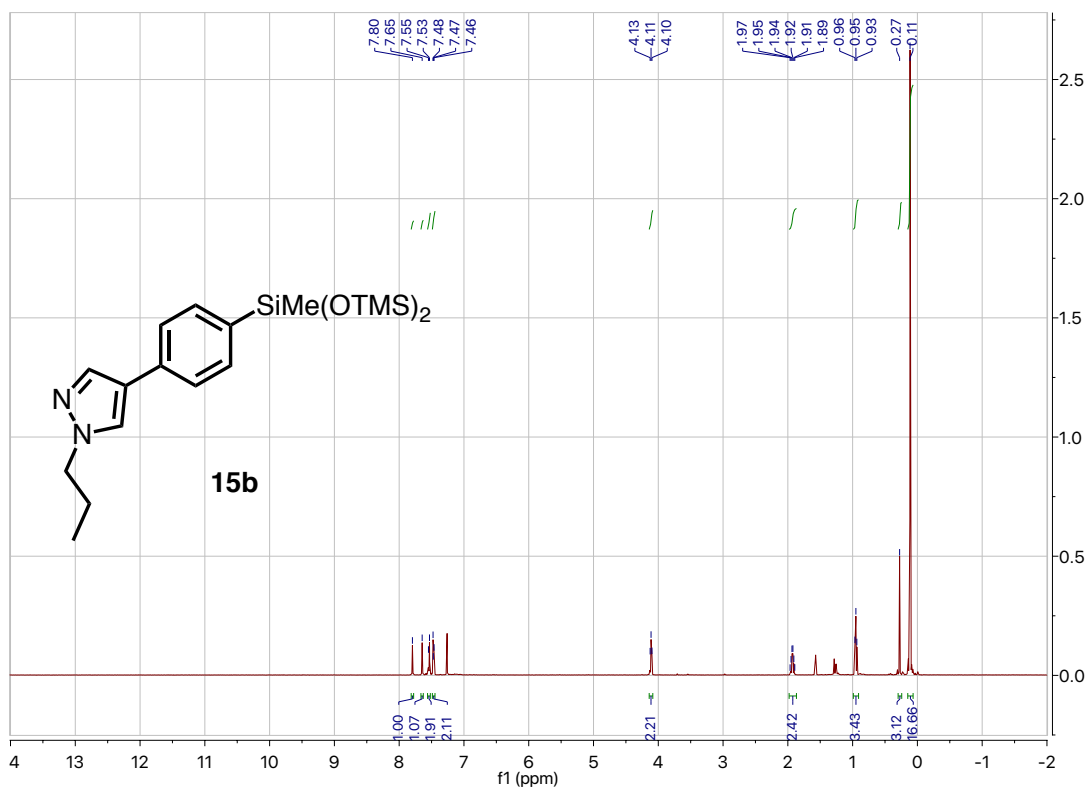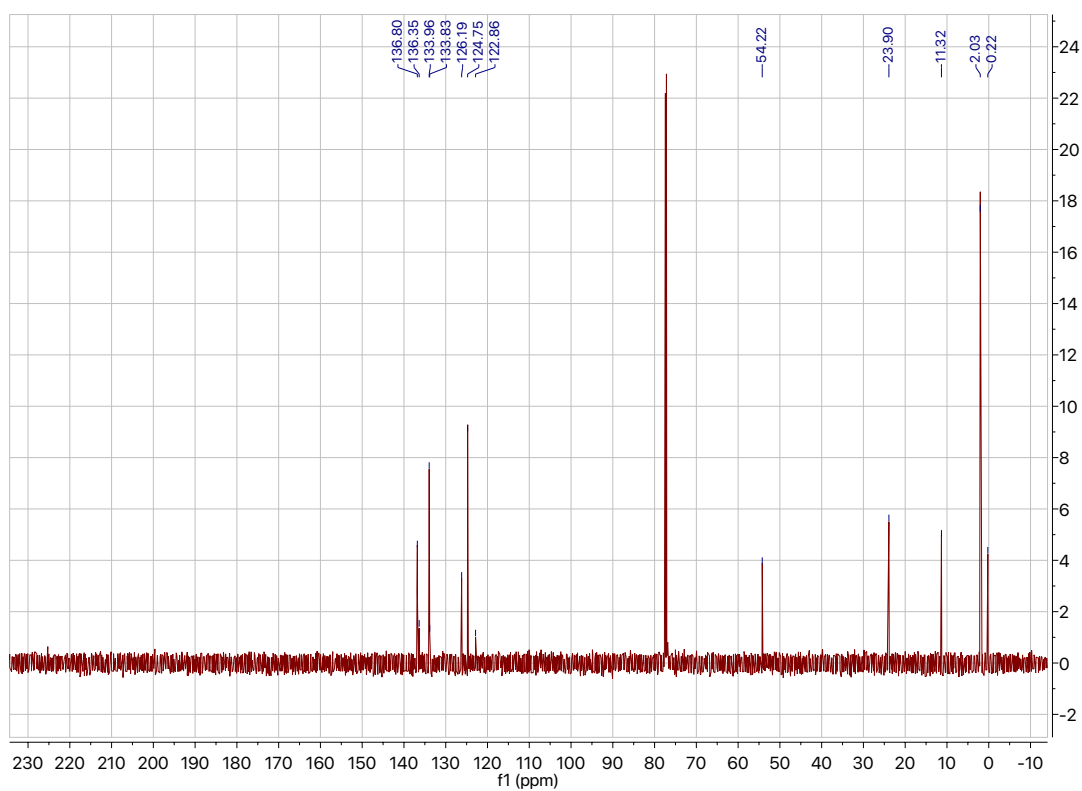

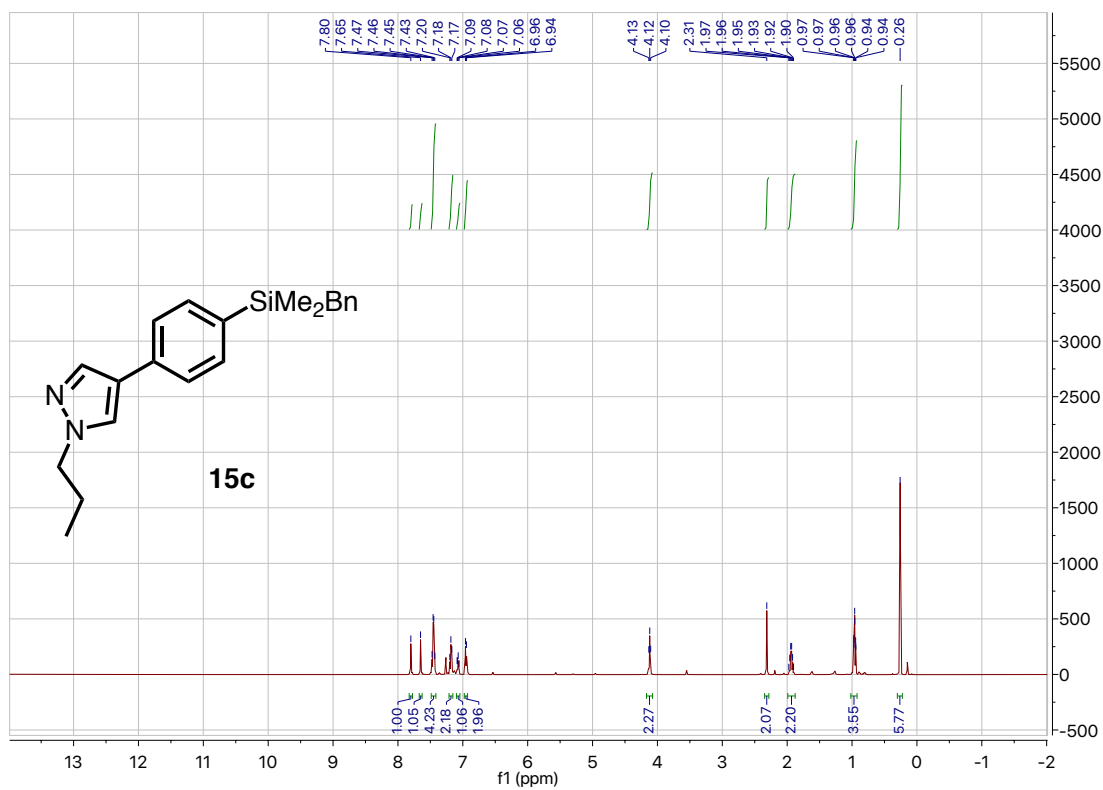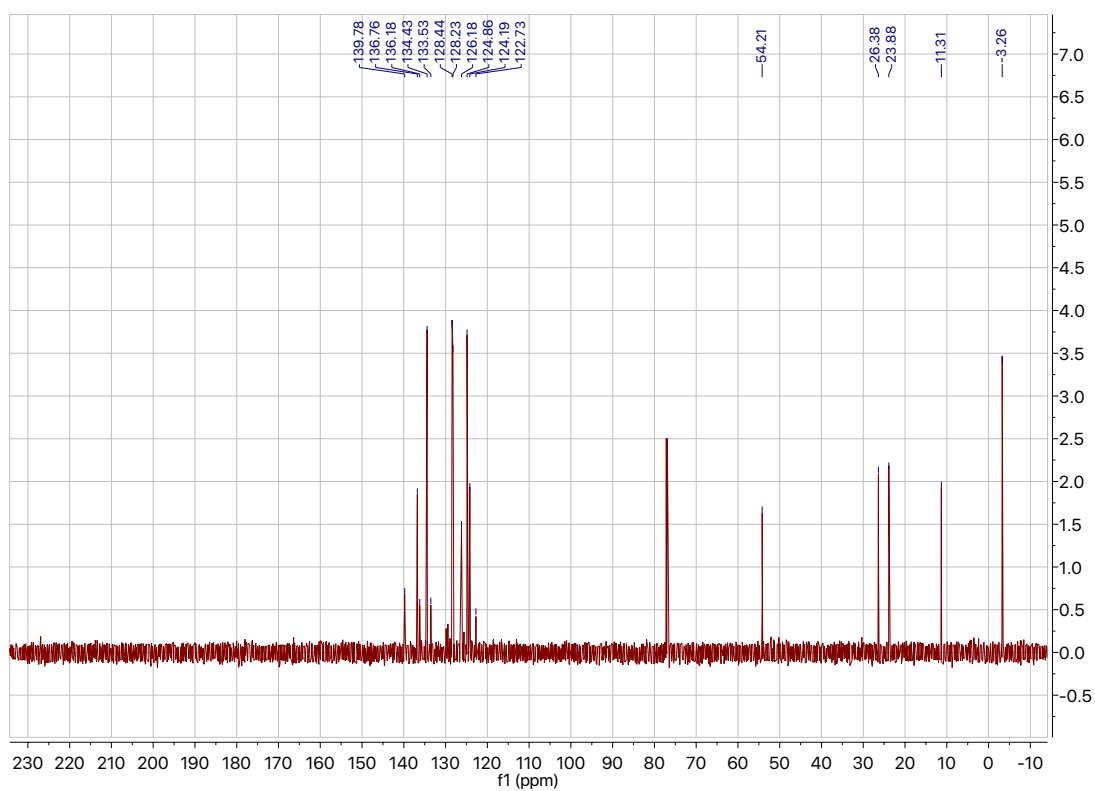

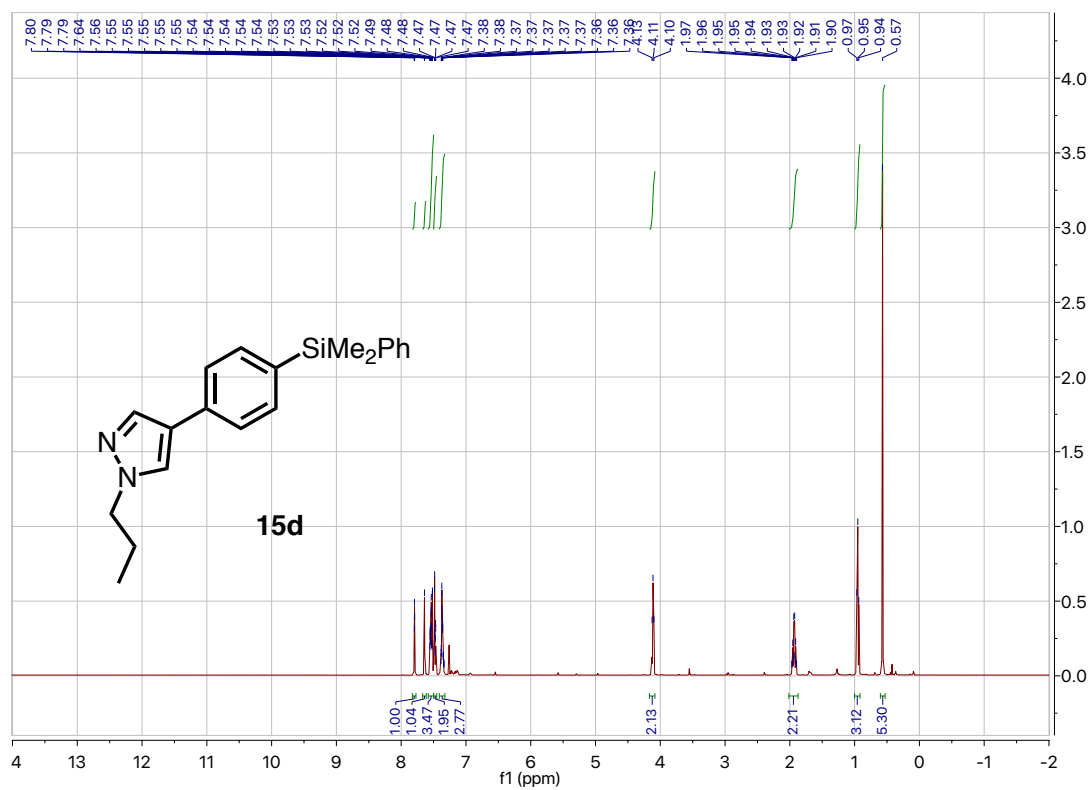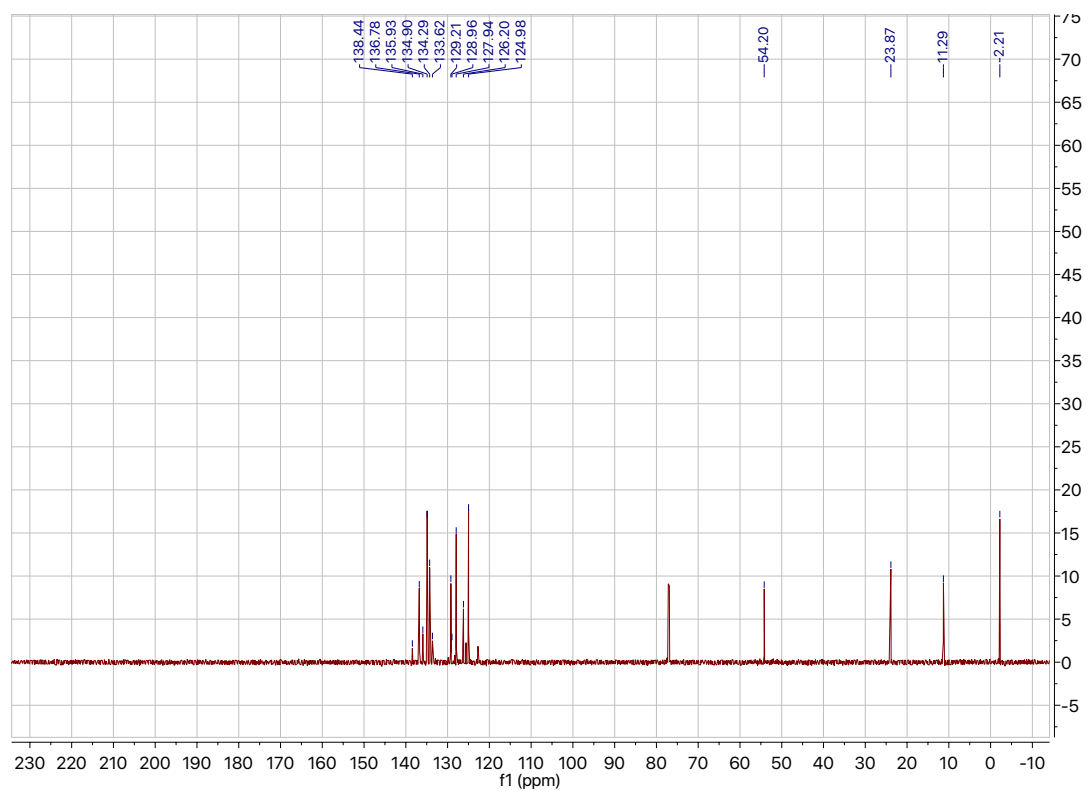

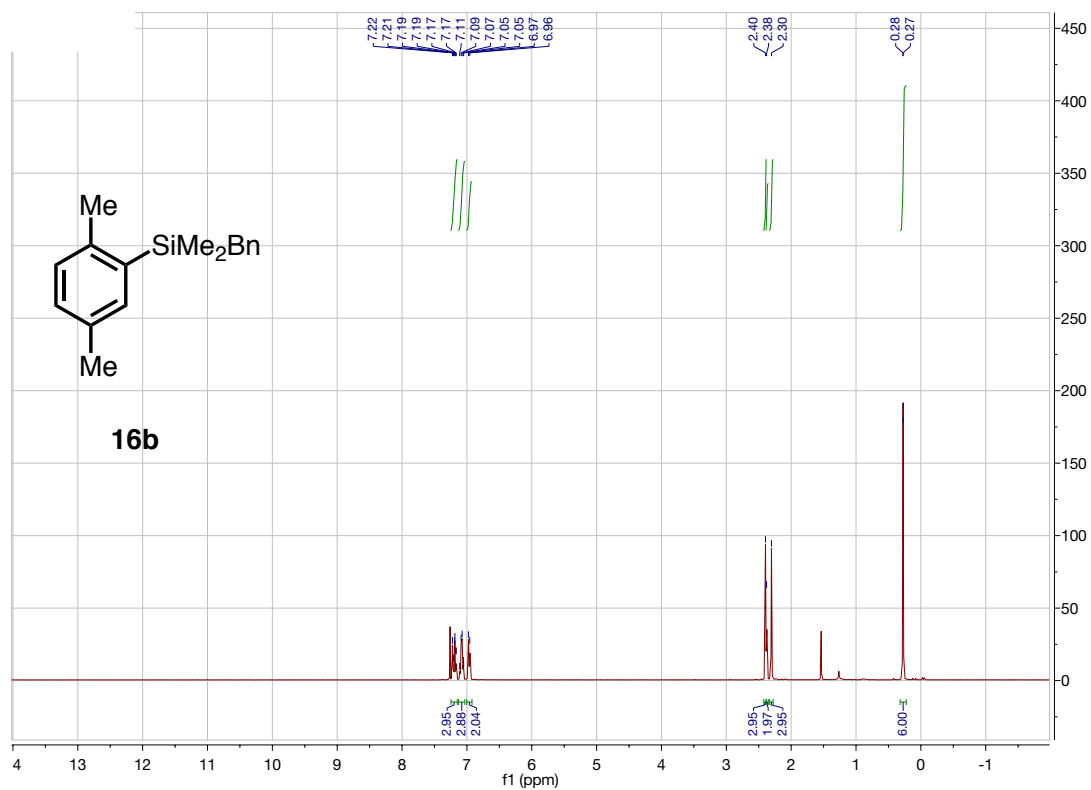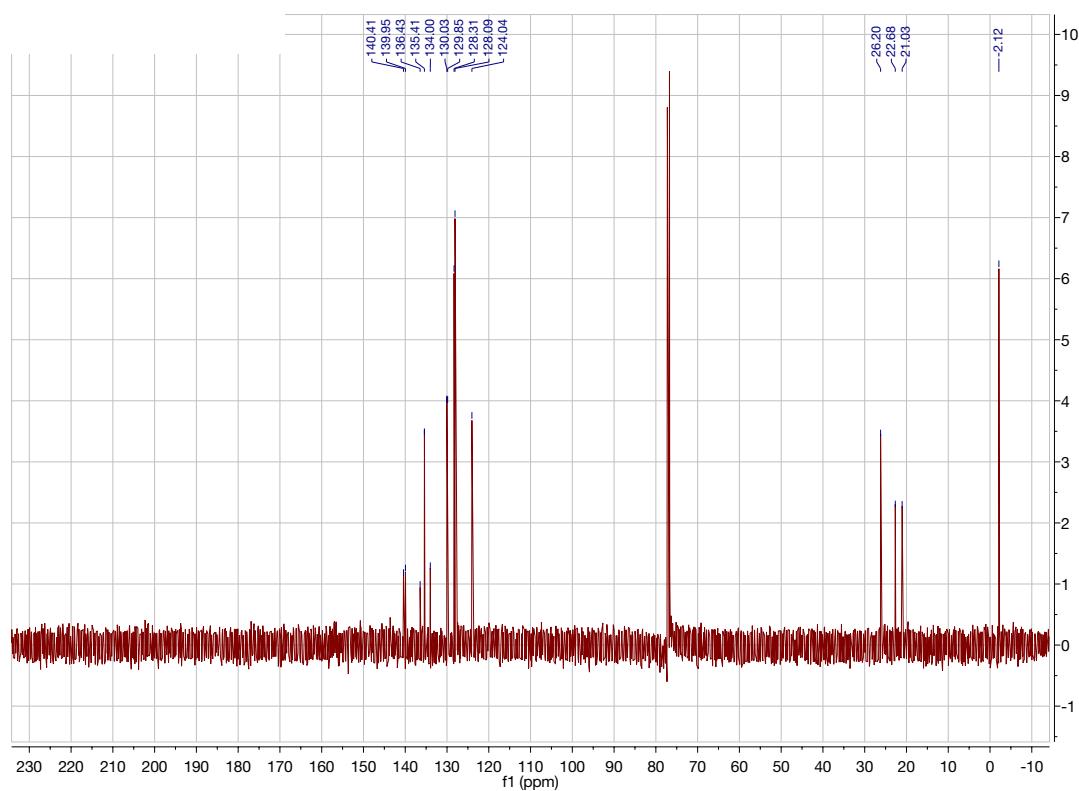

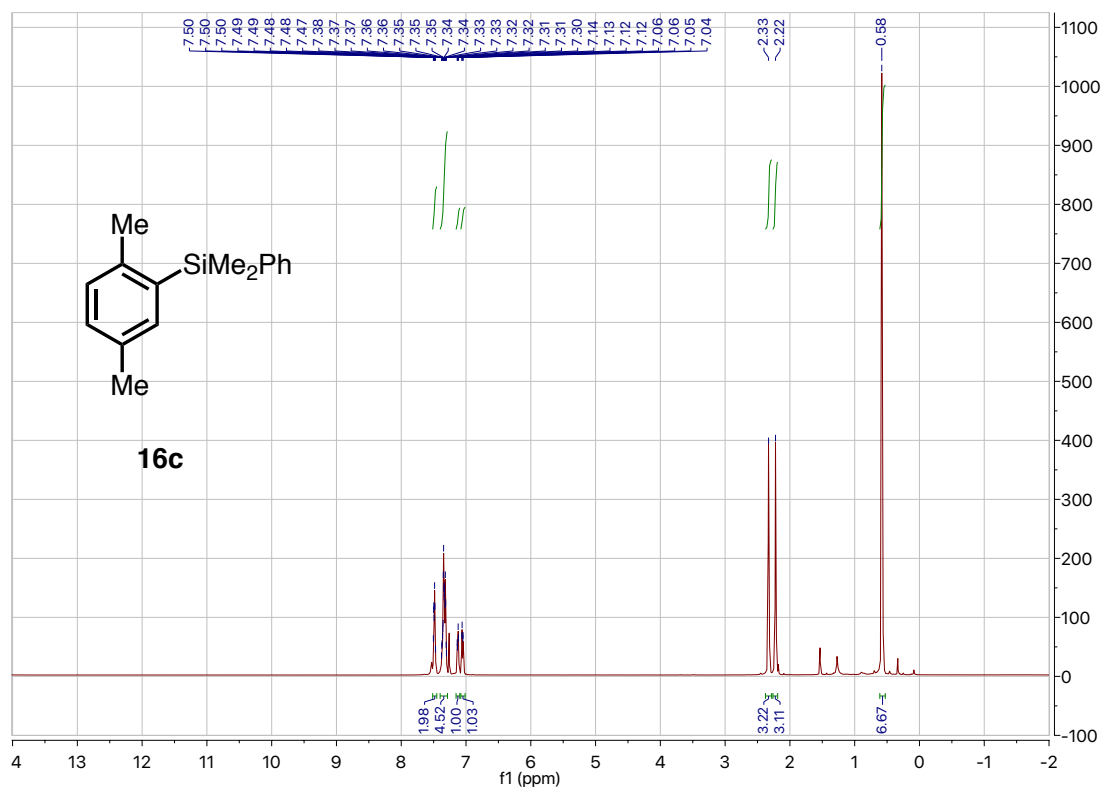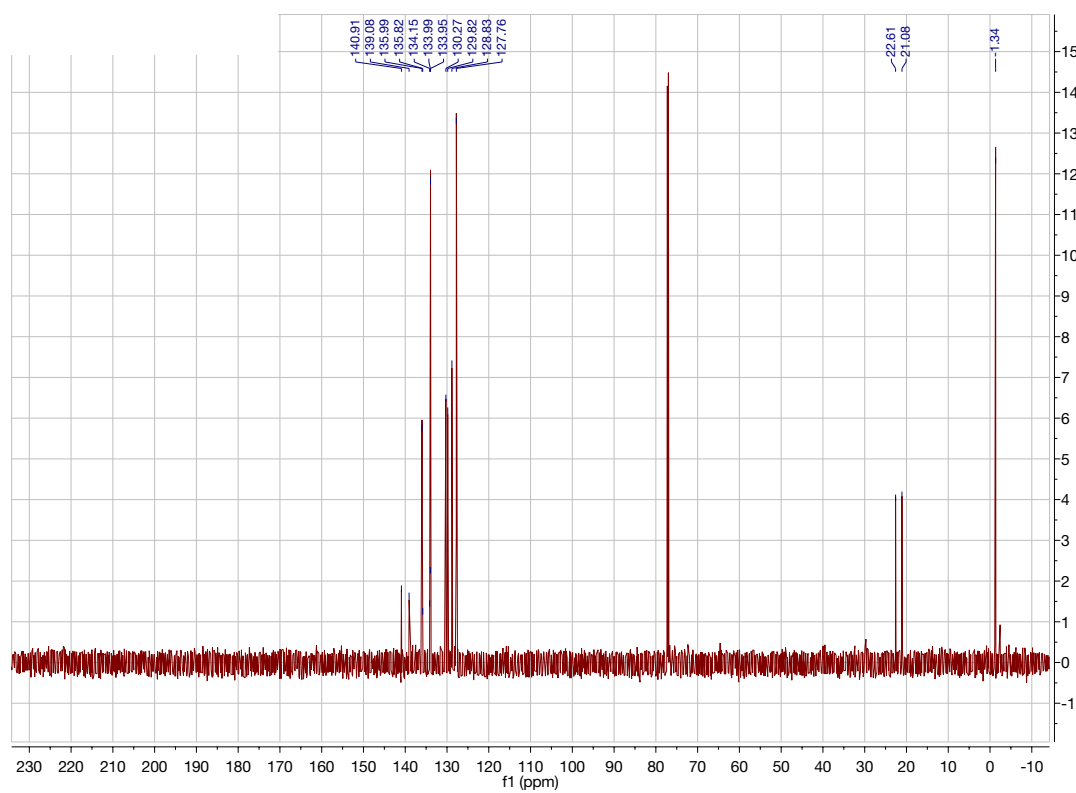

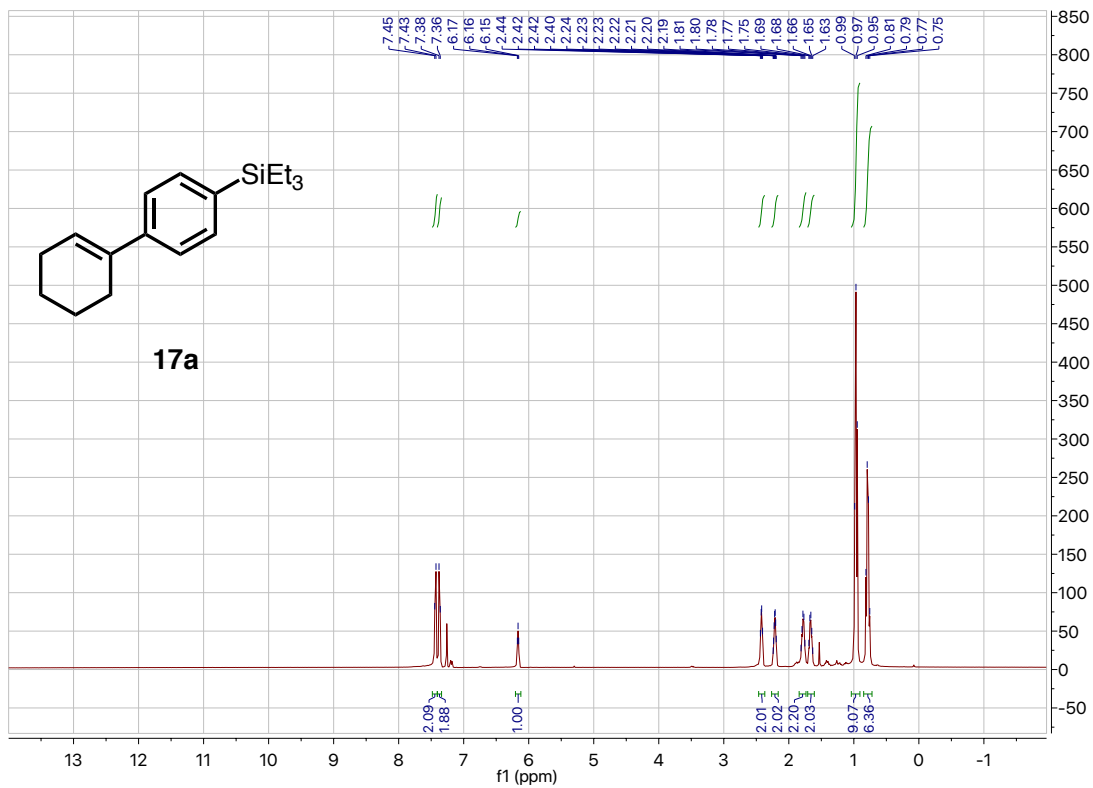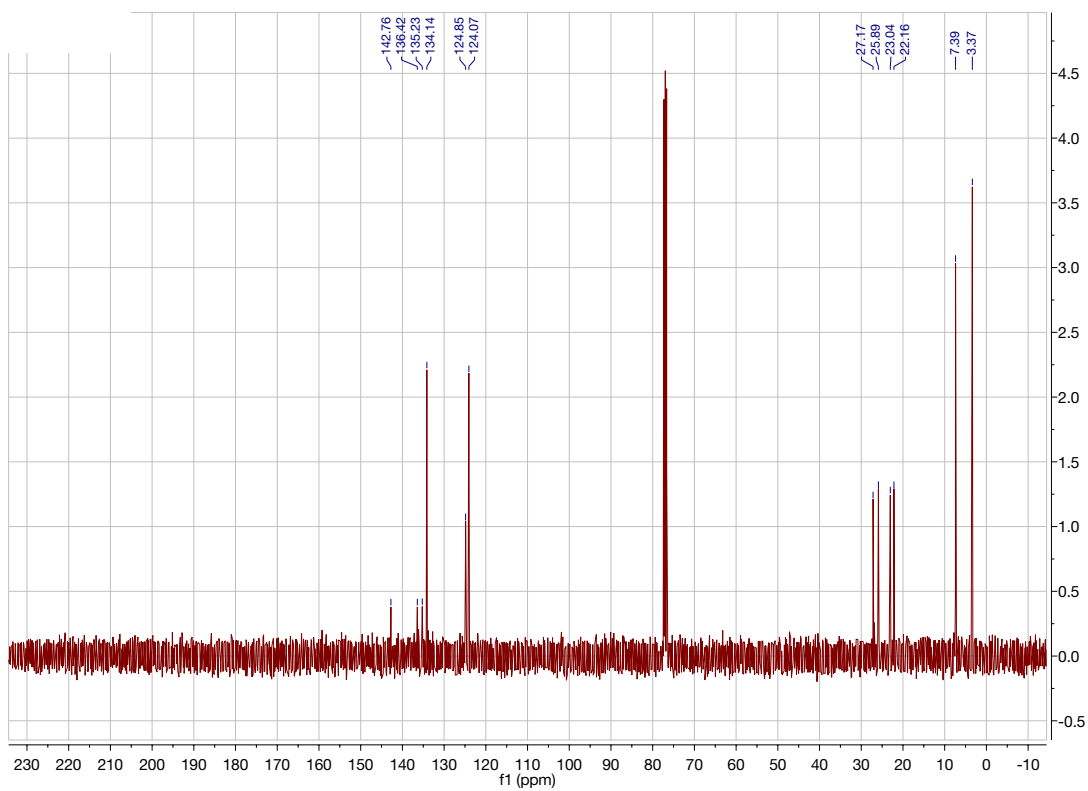



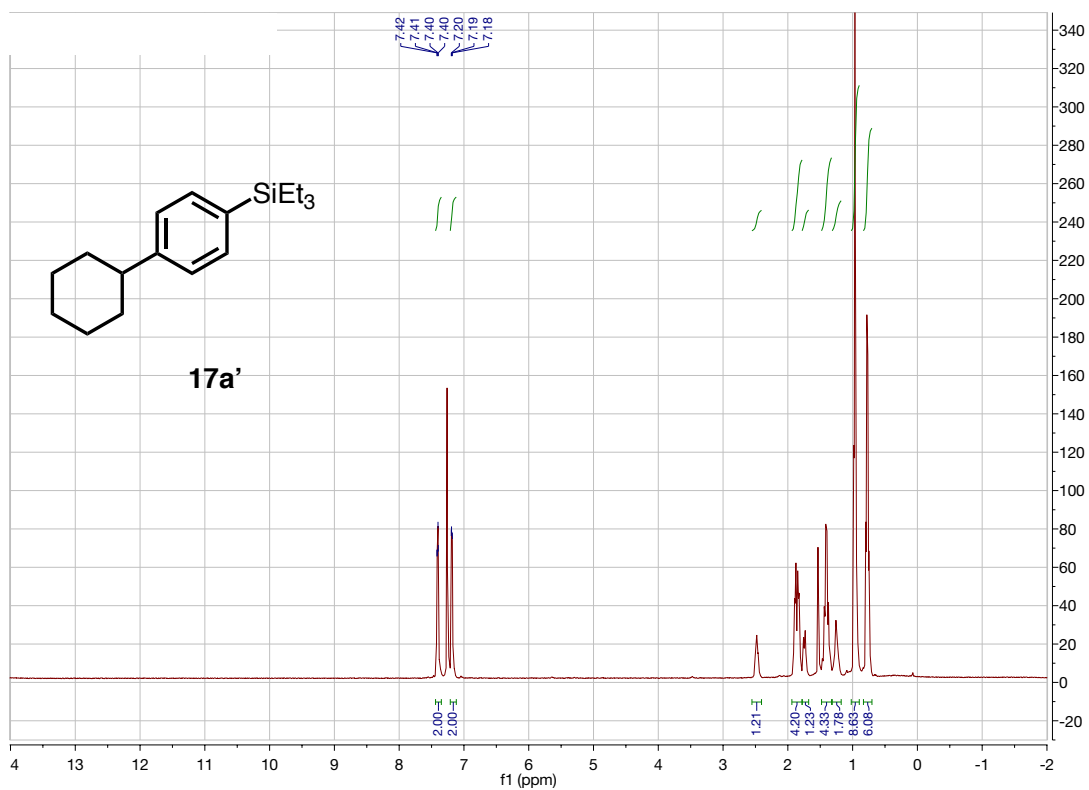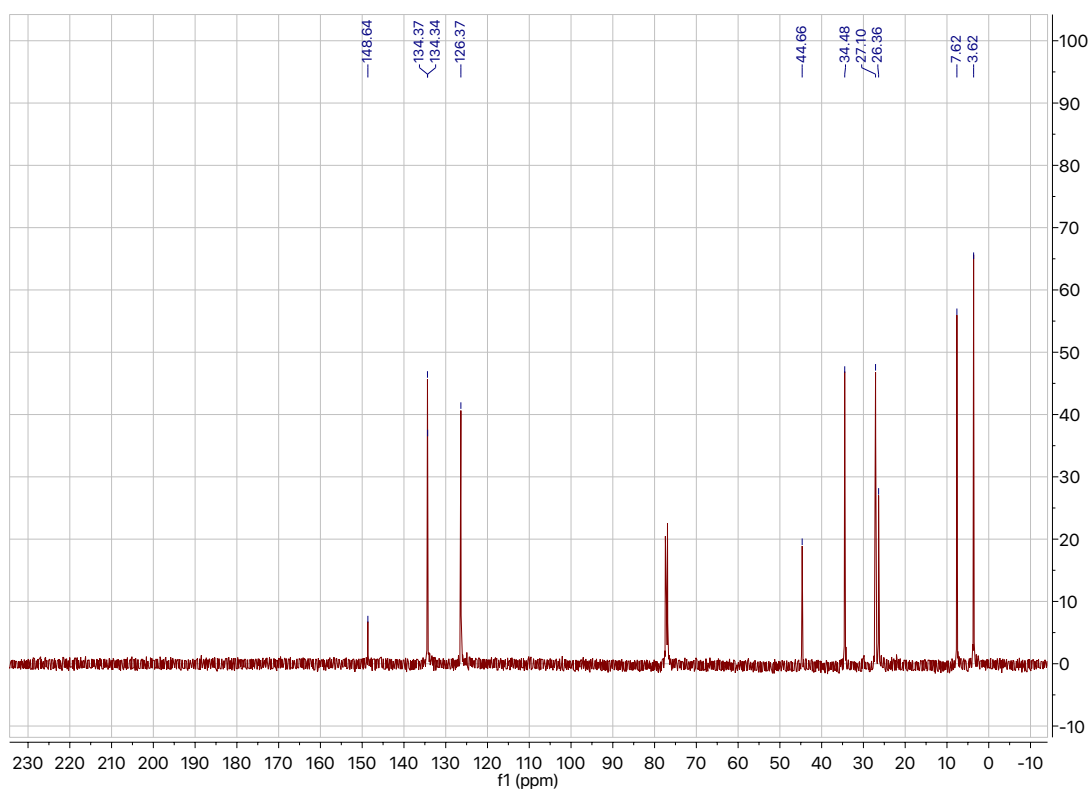

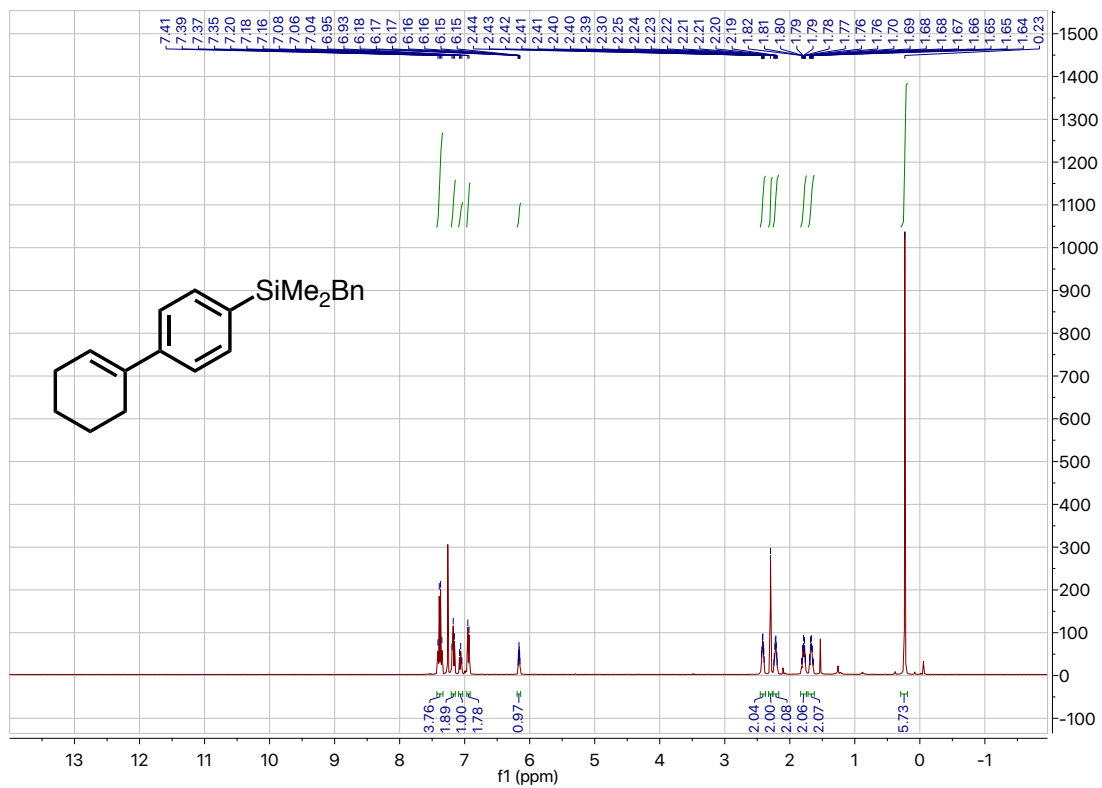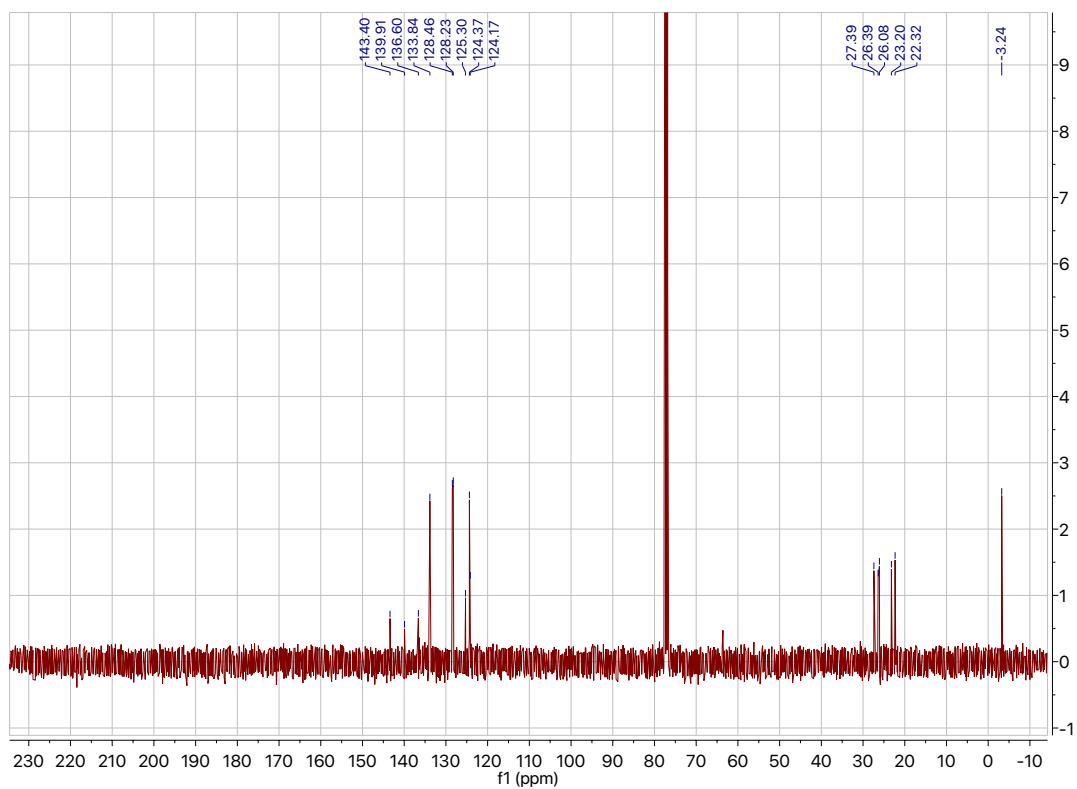

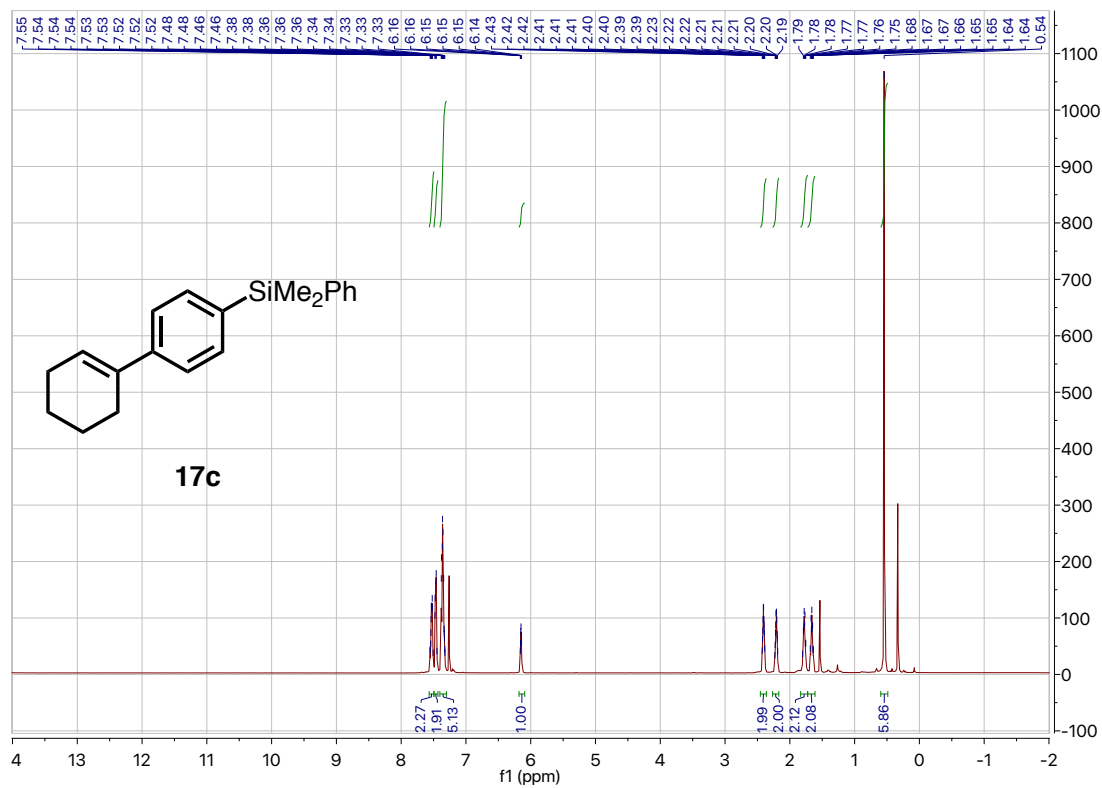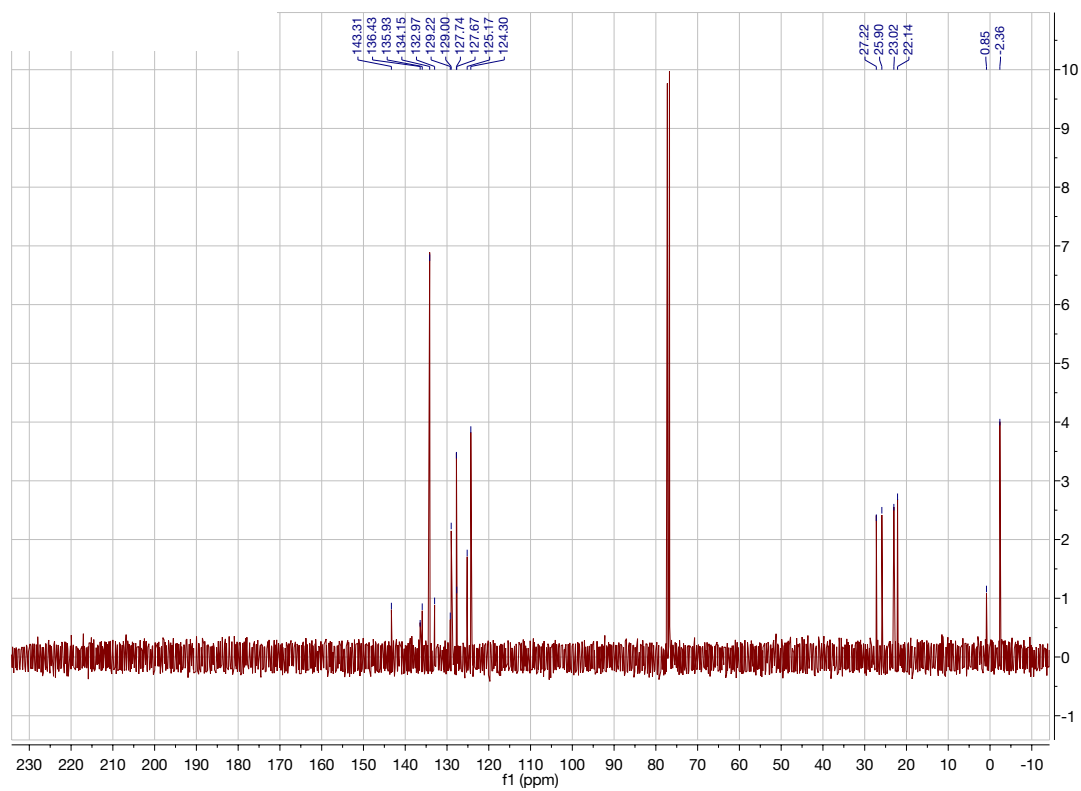

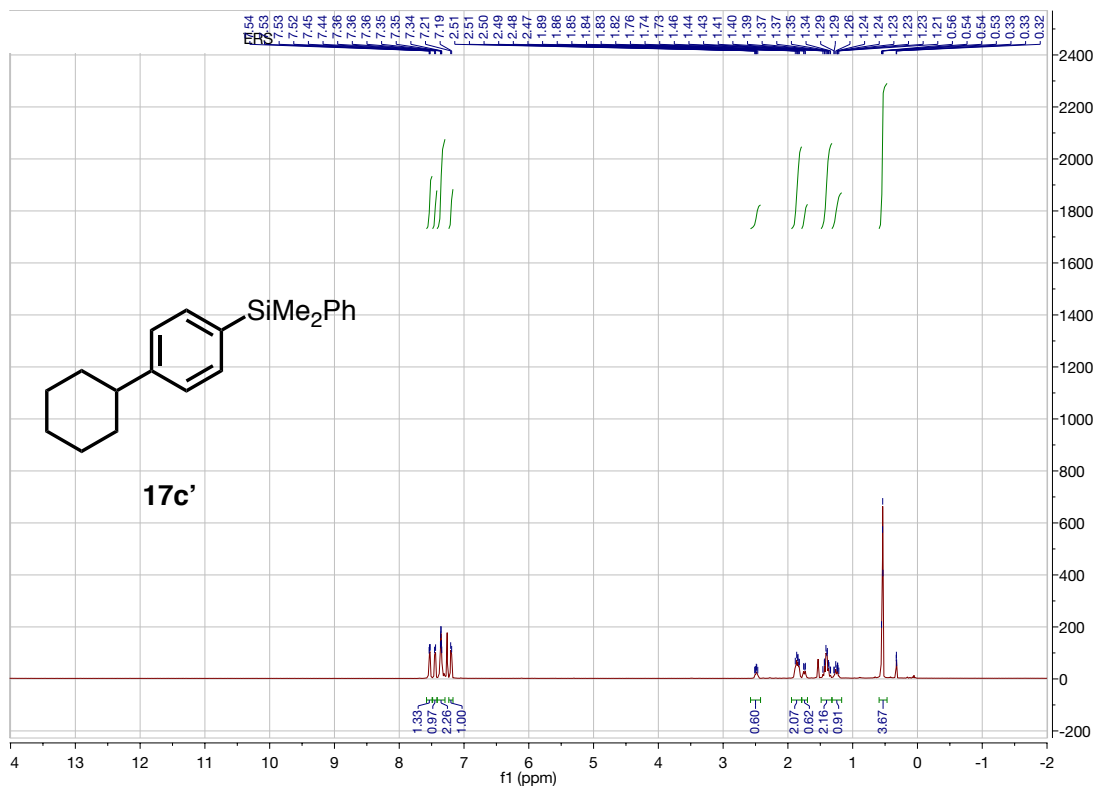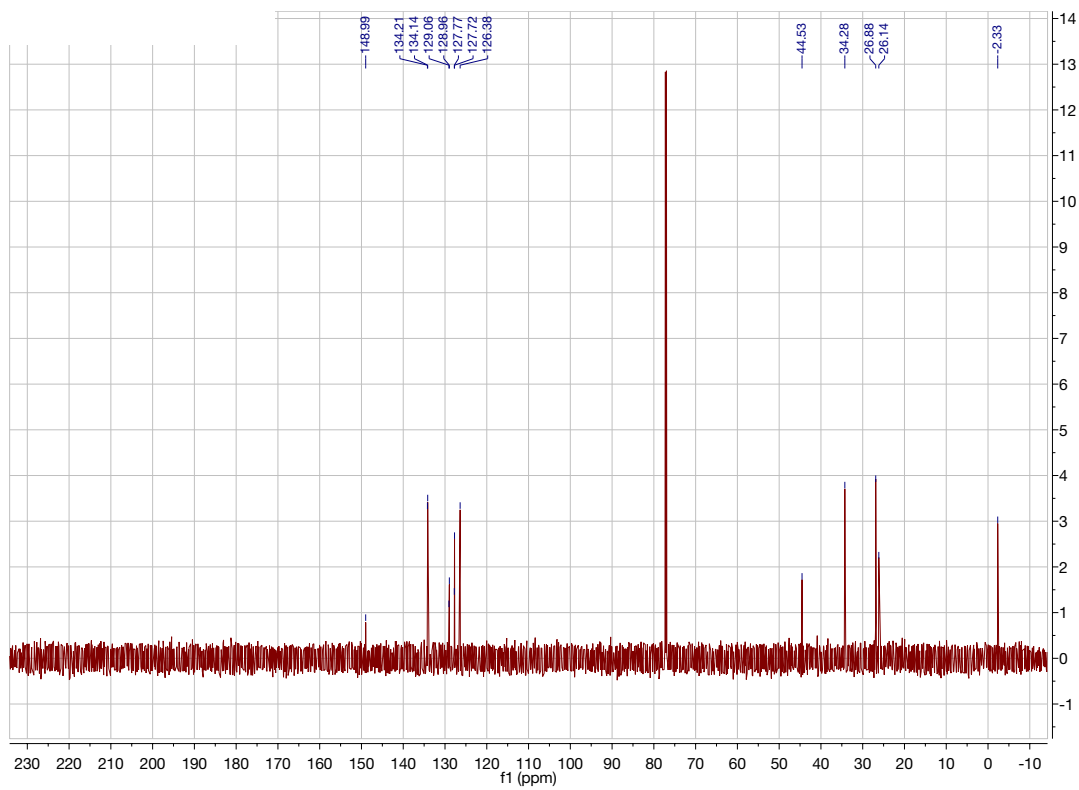

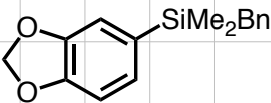

S93

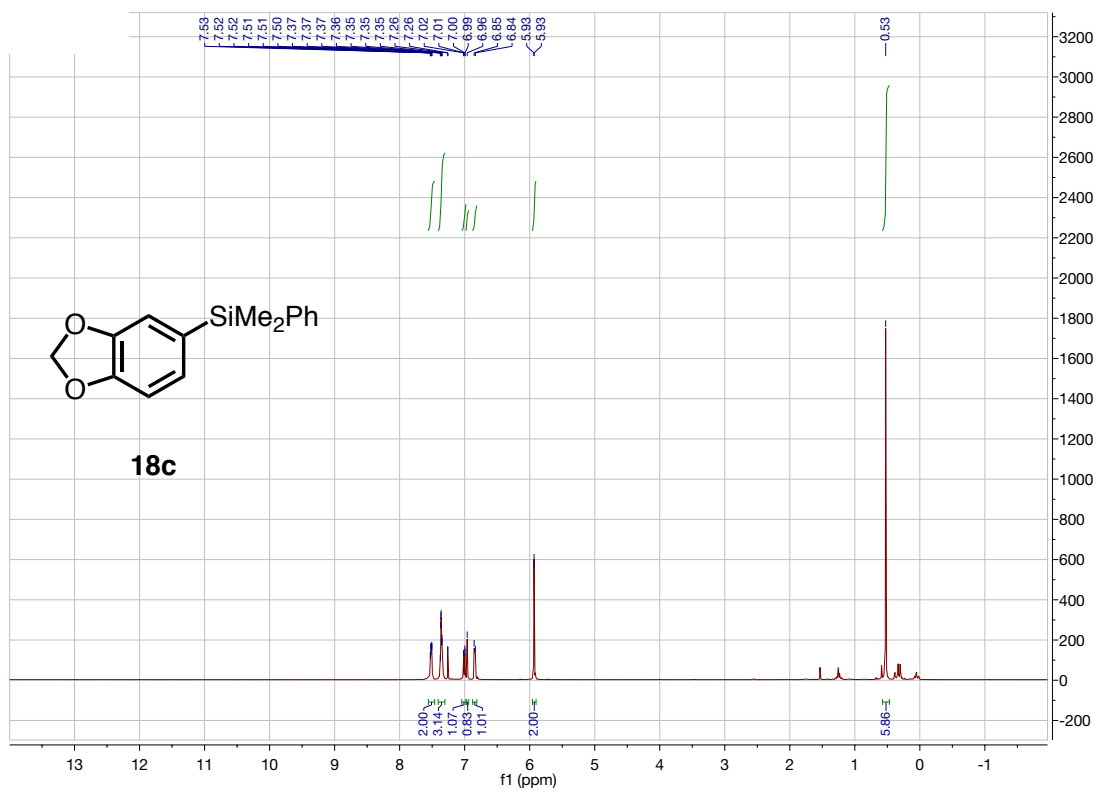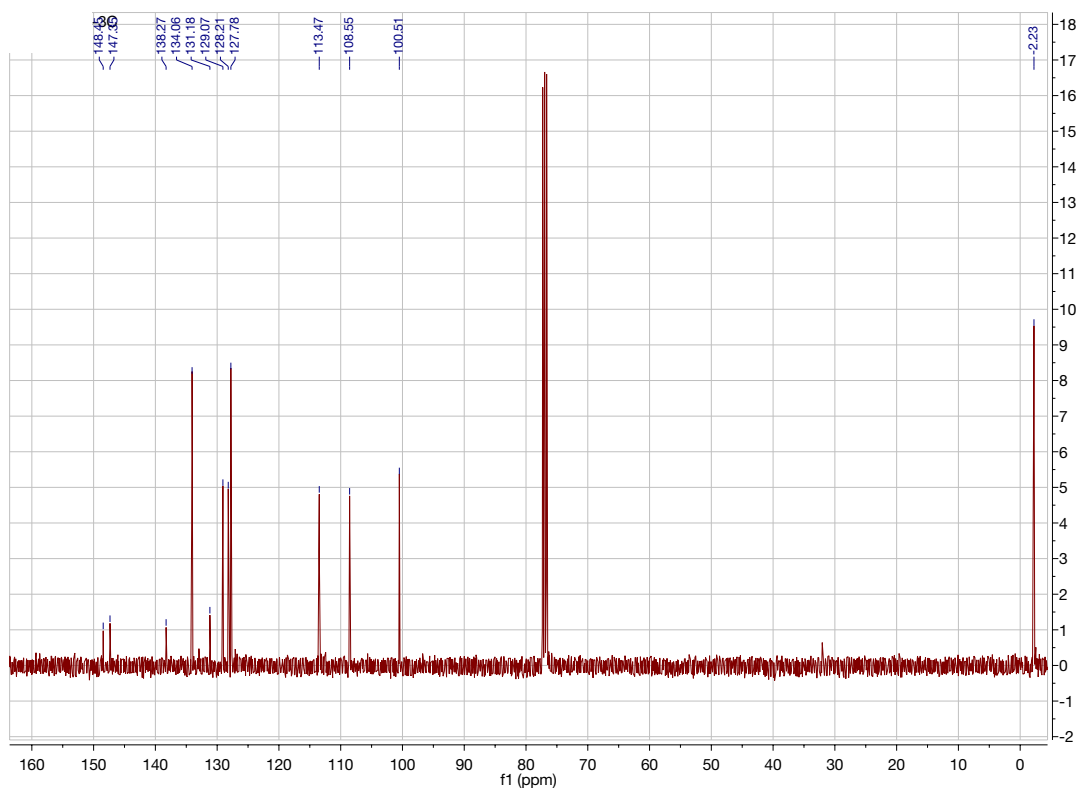

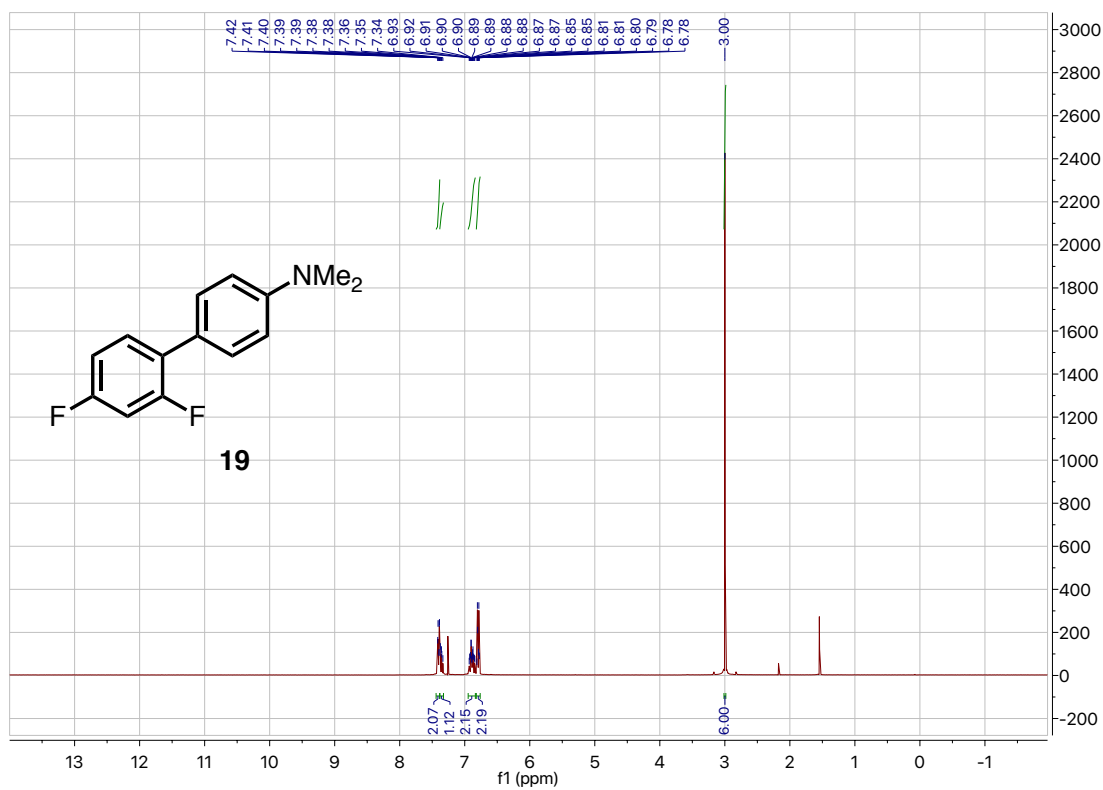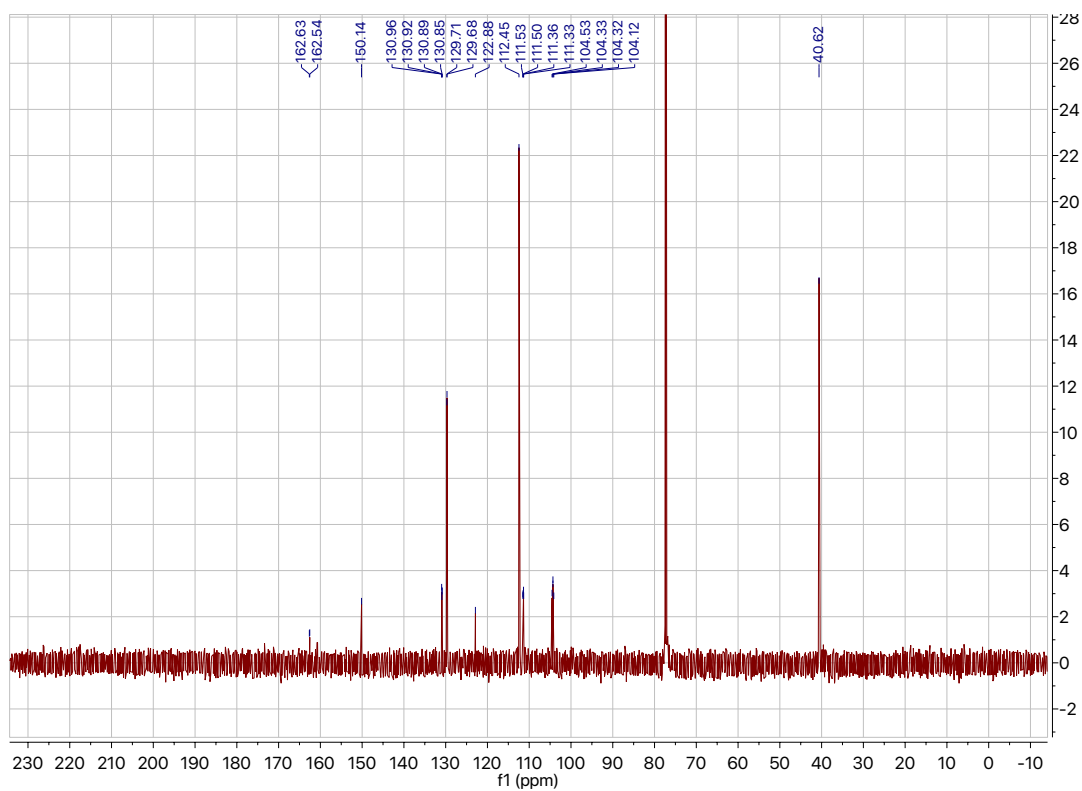

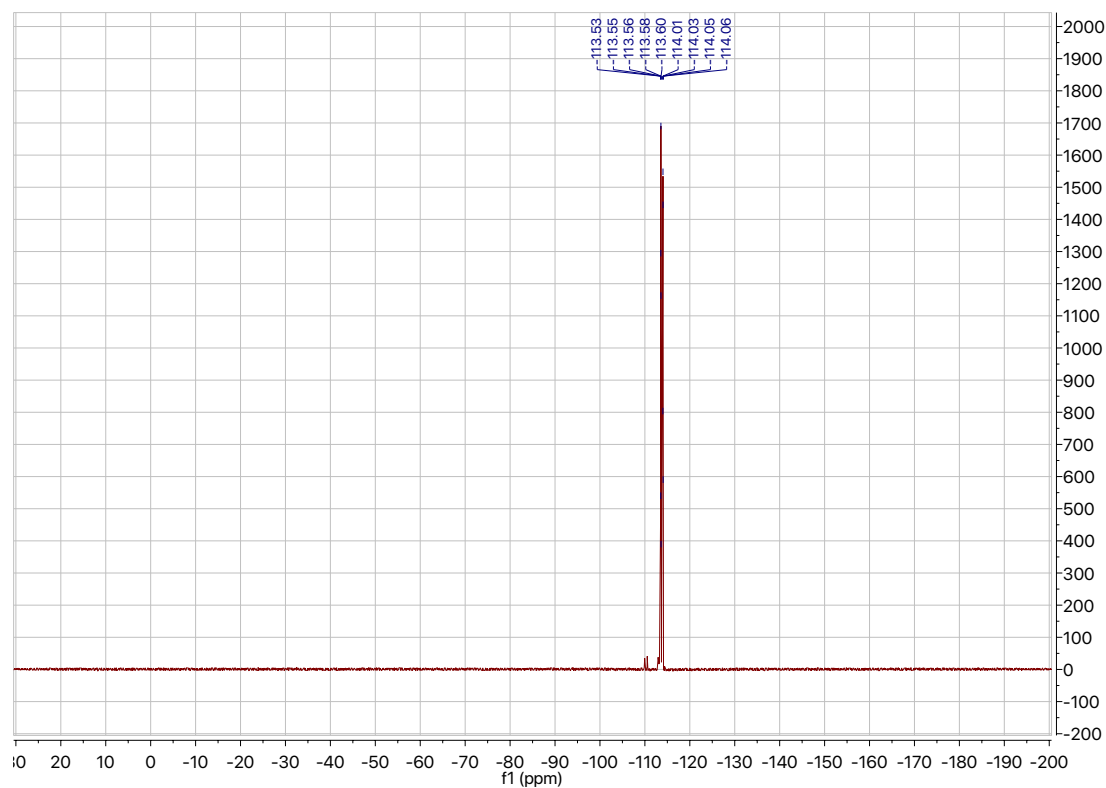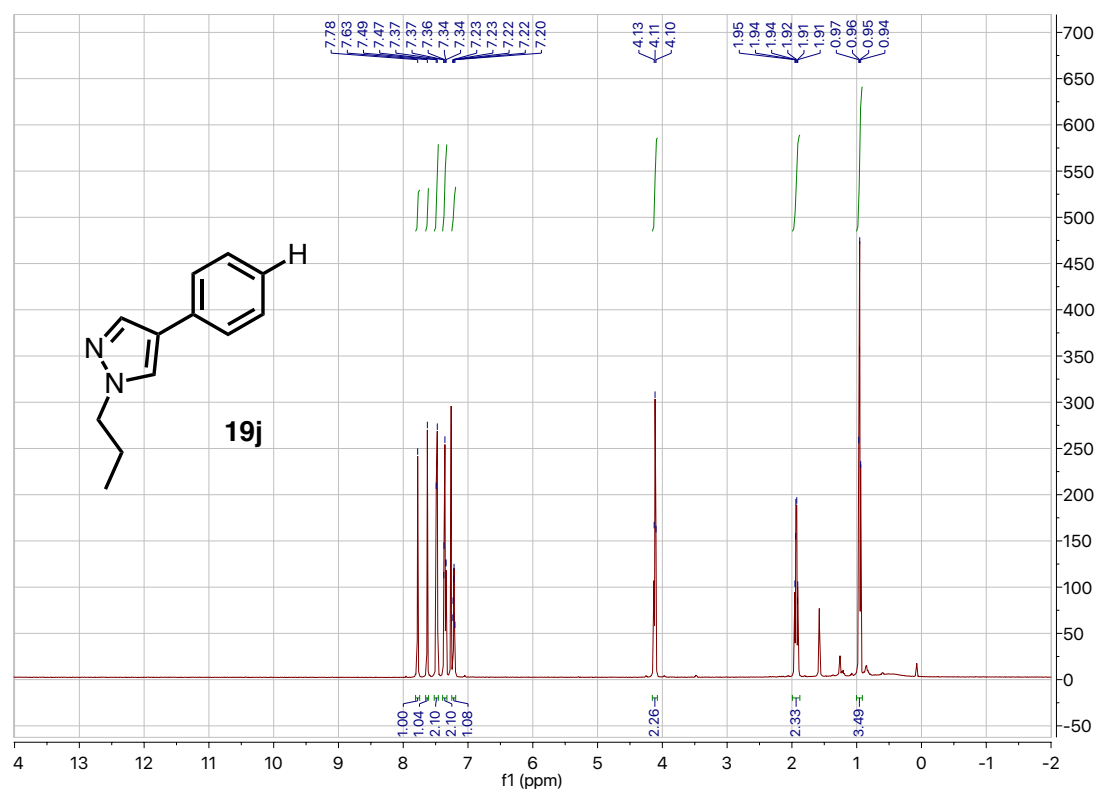



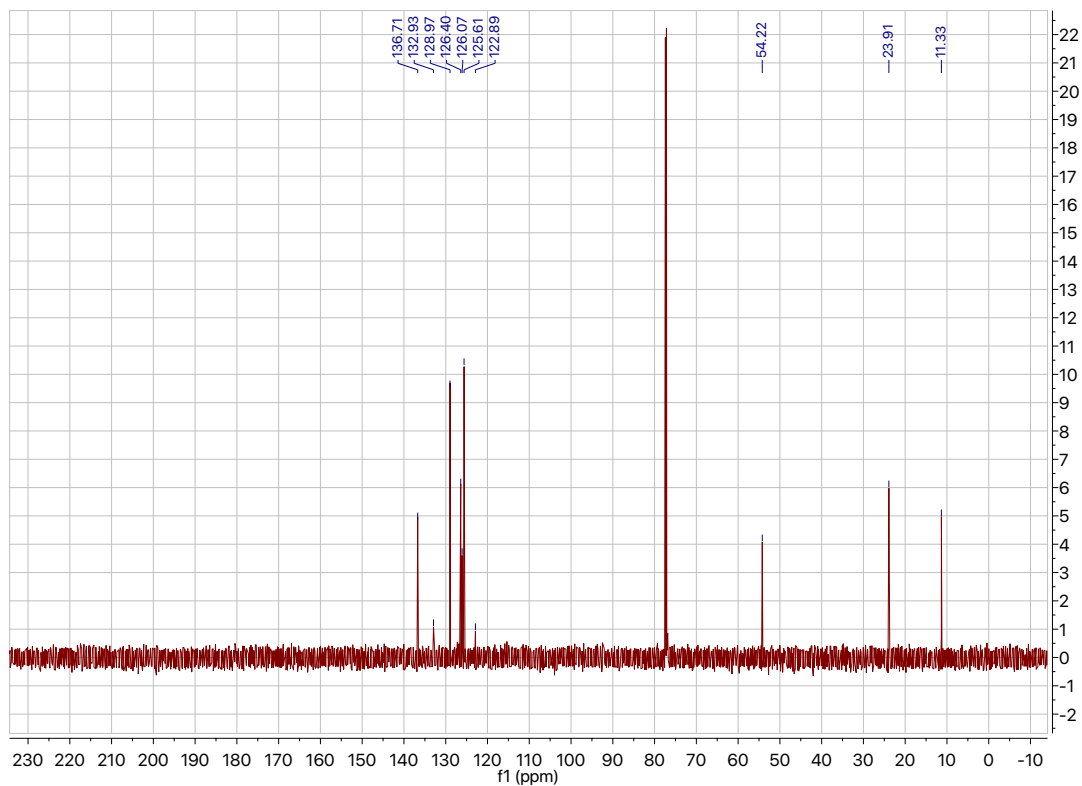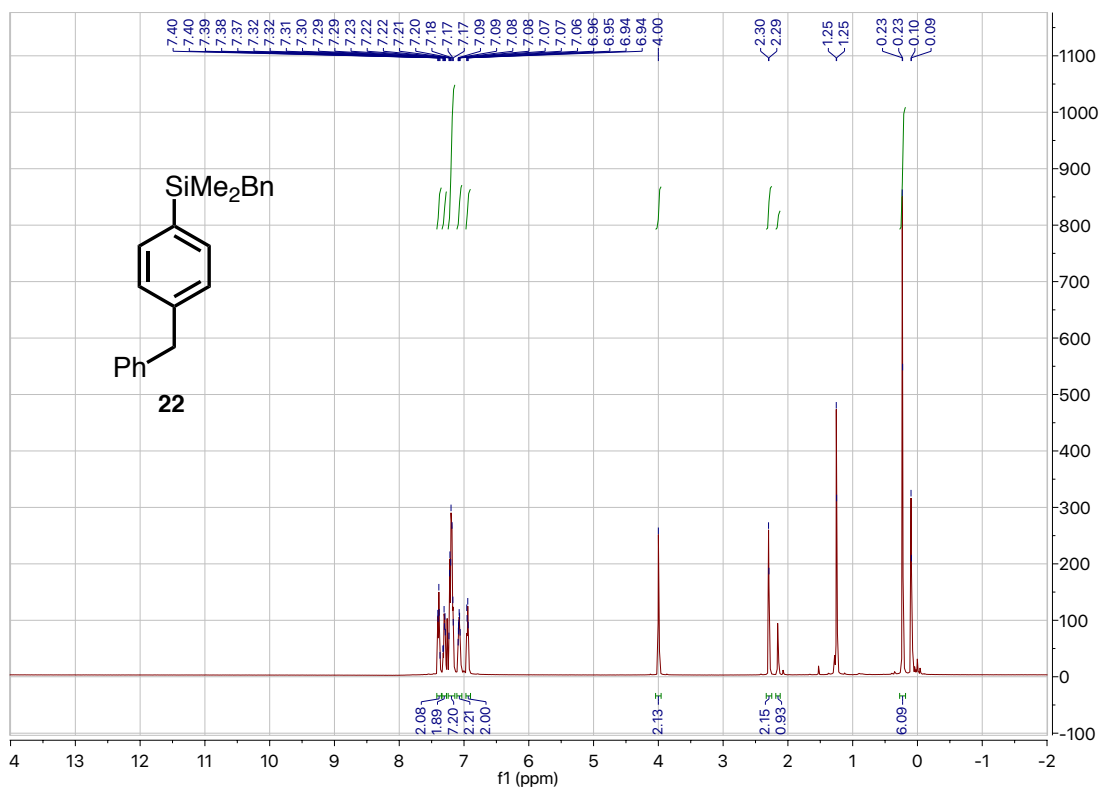

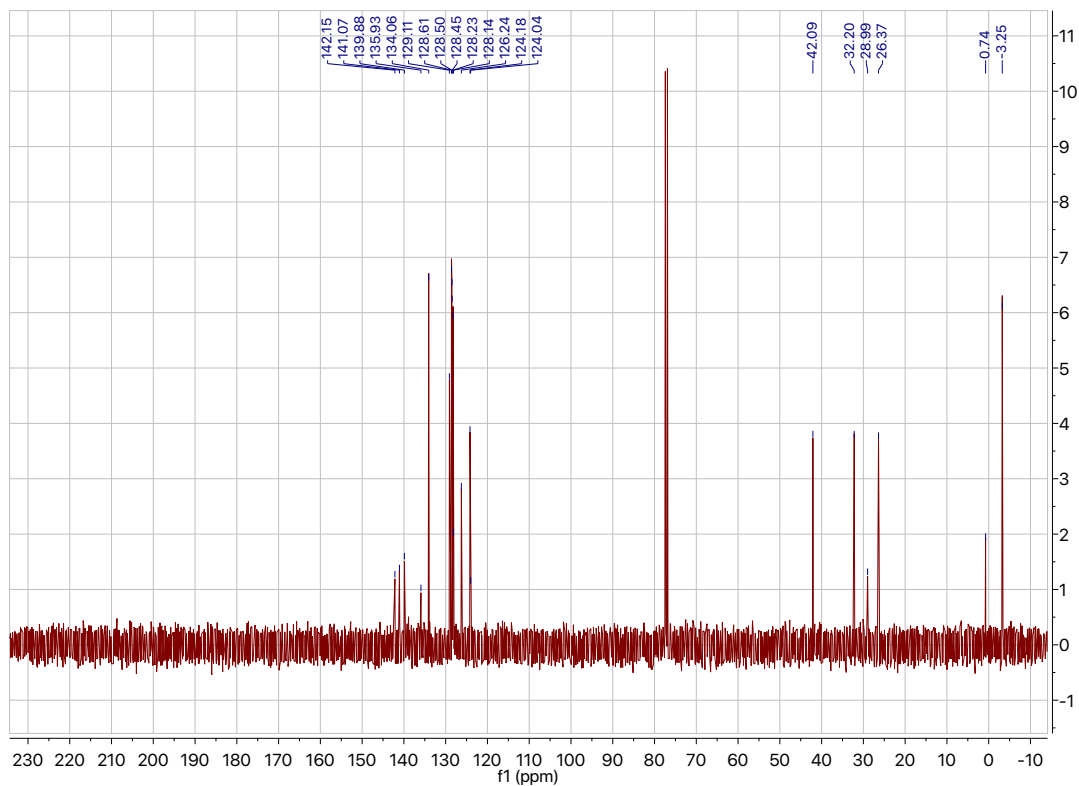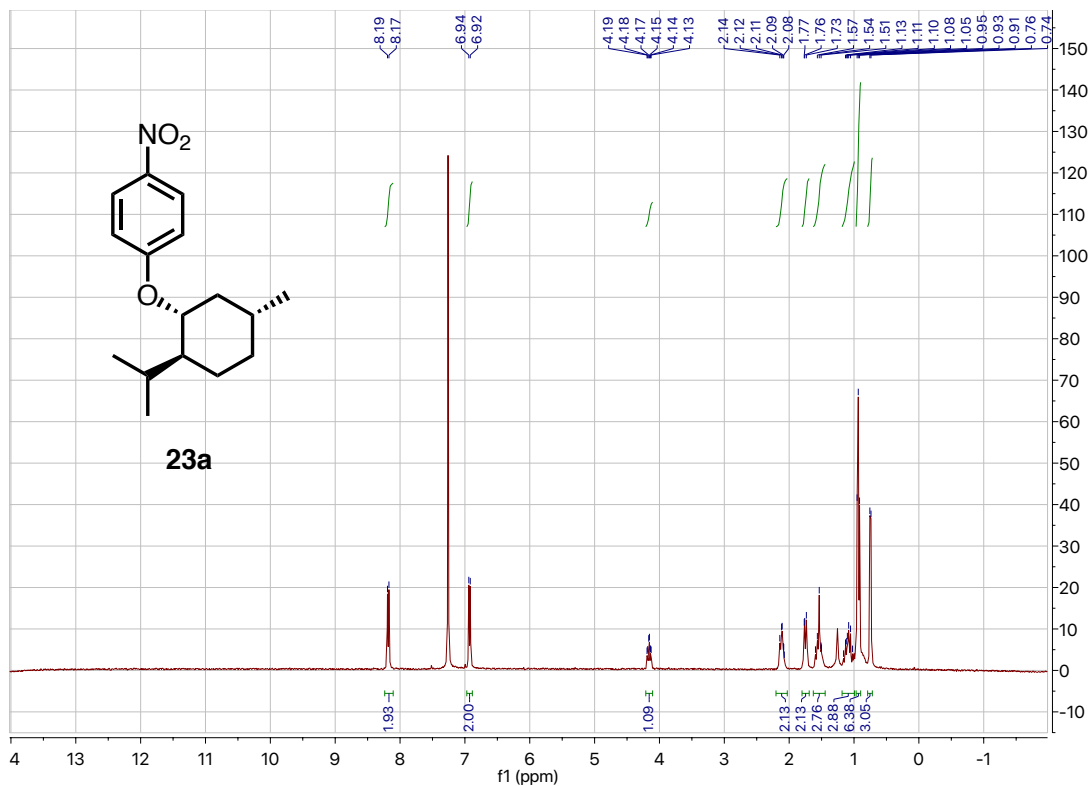

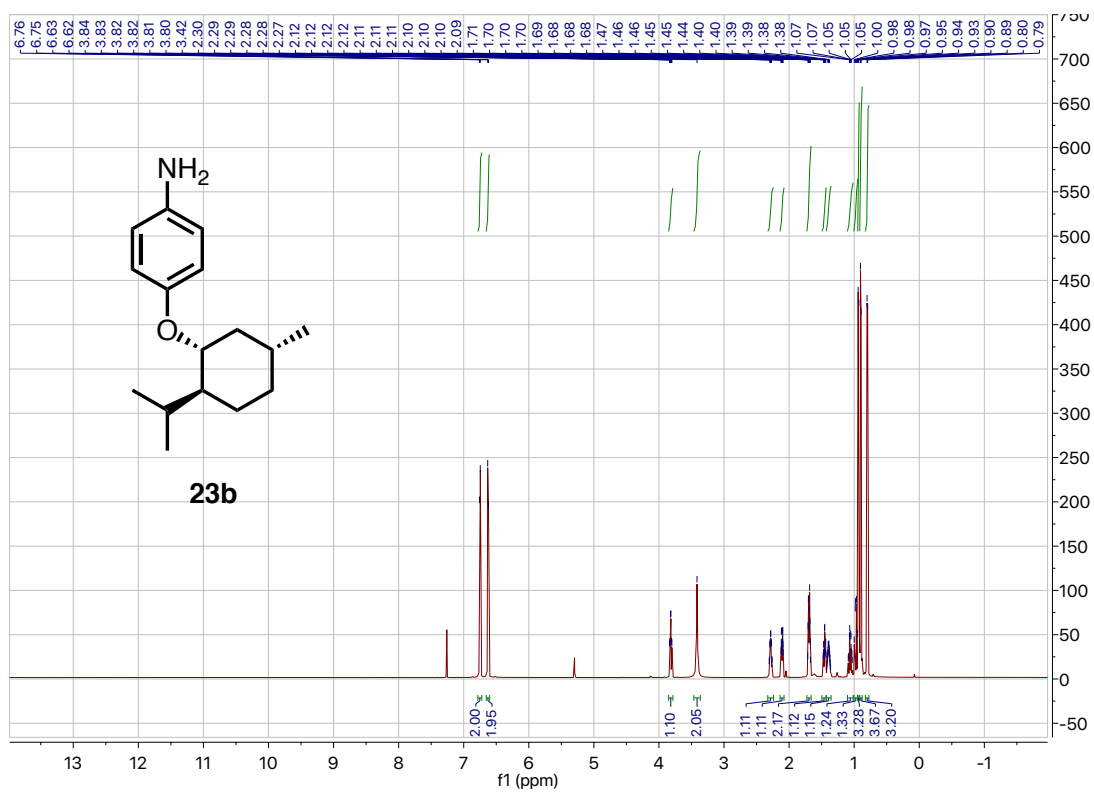

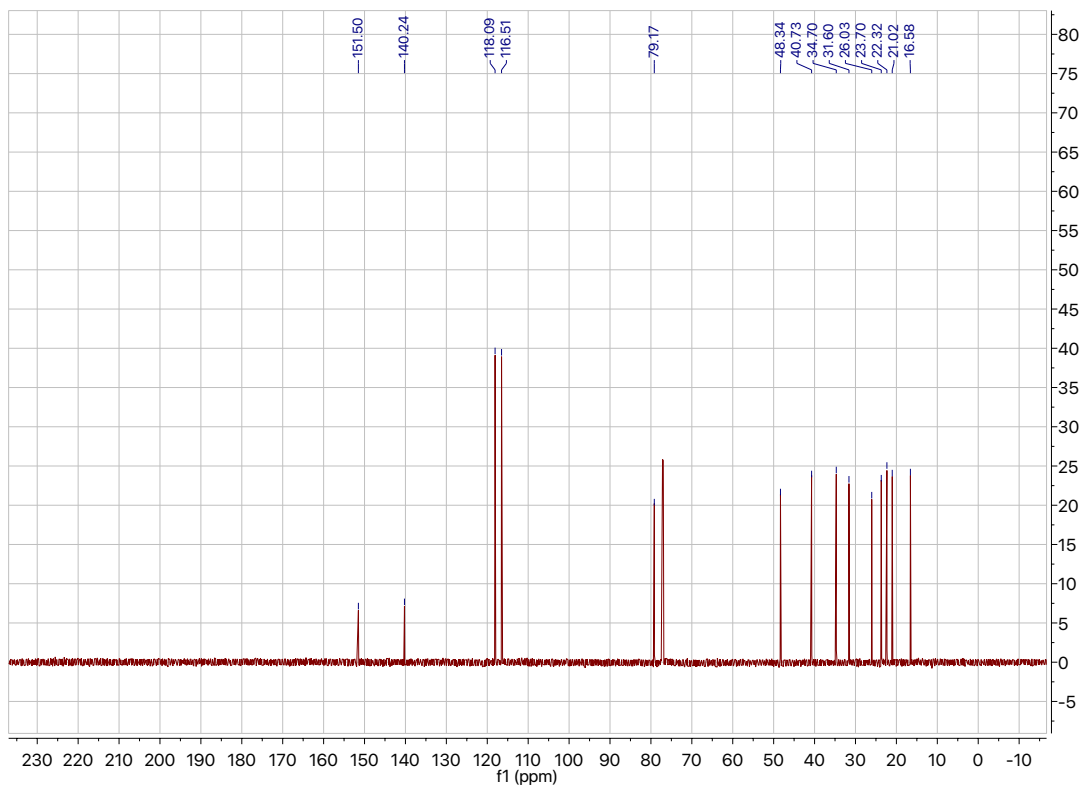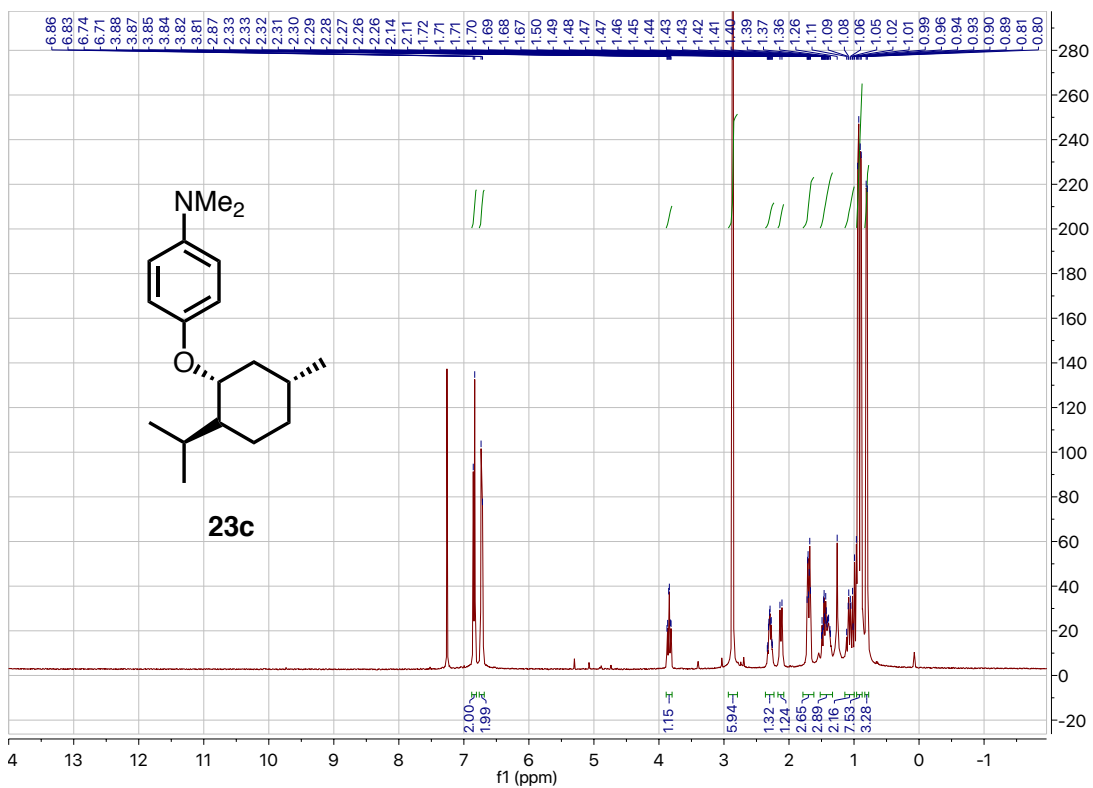

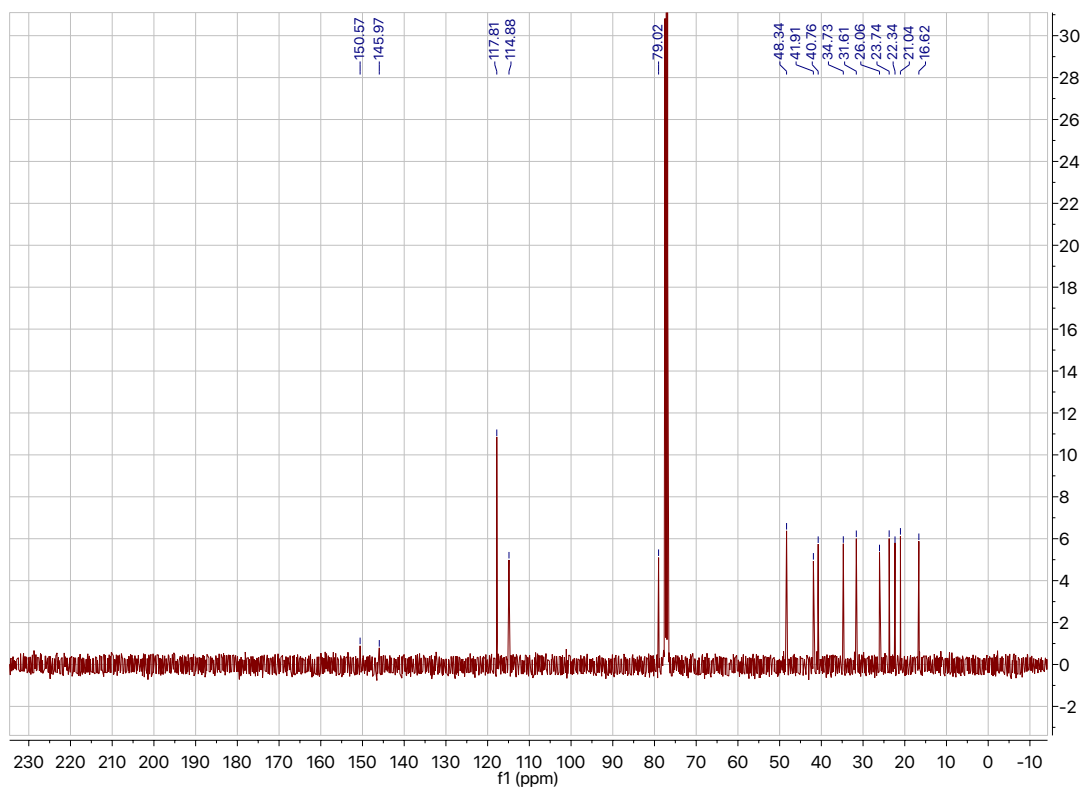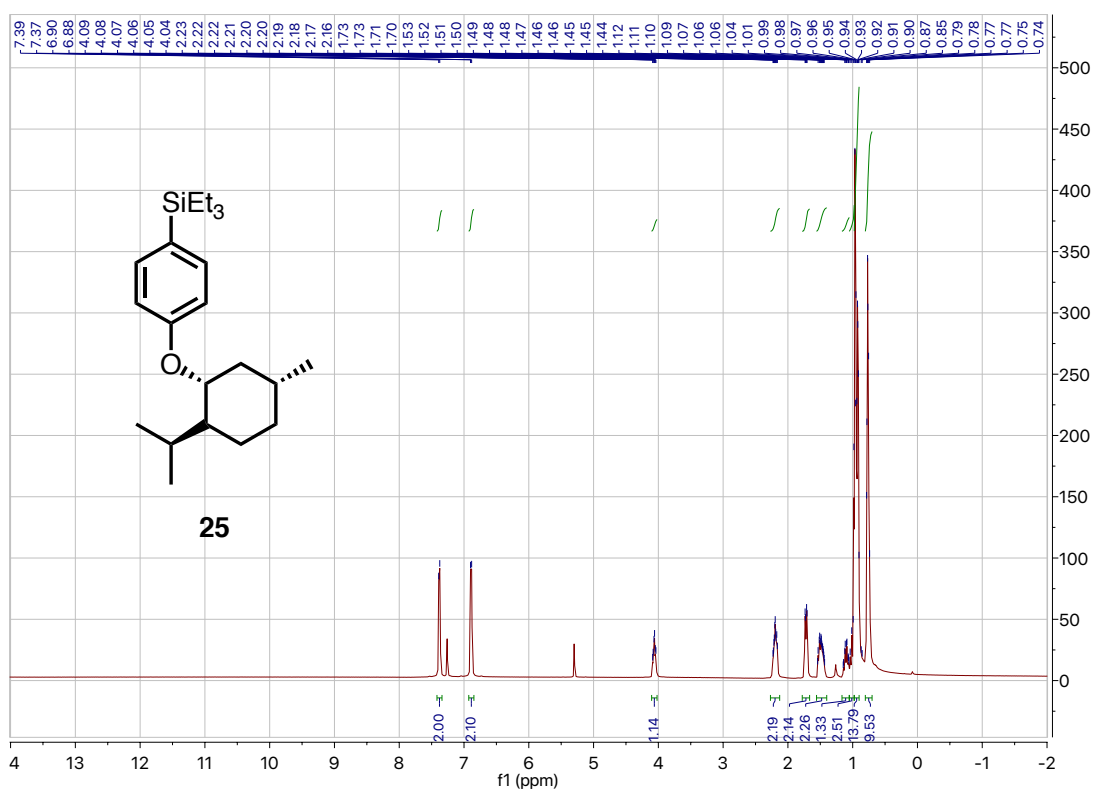

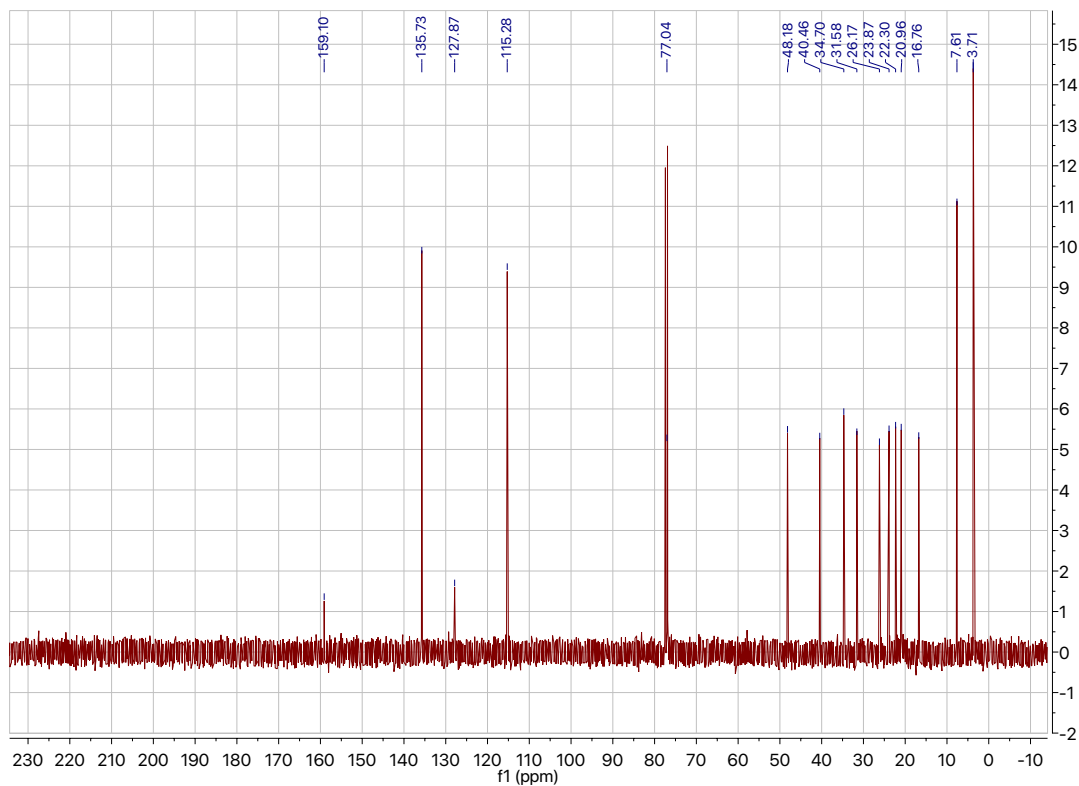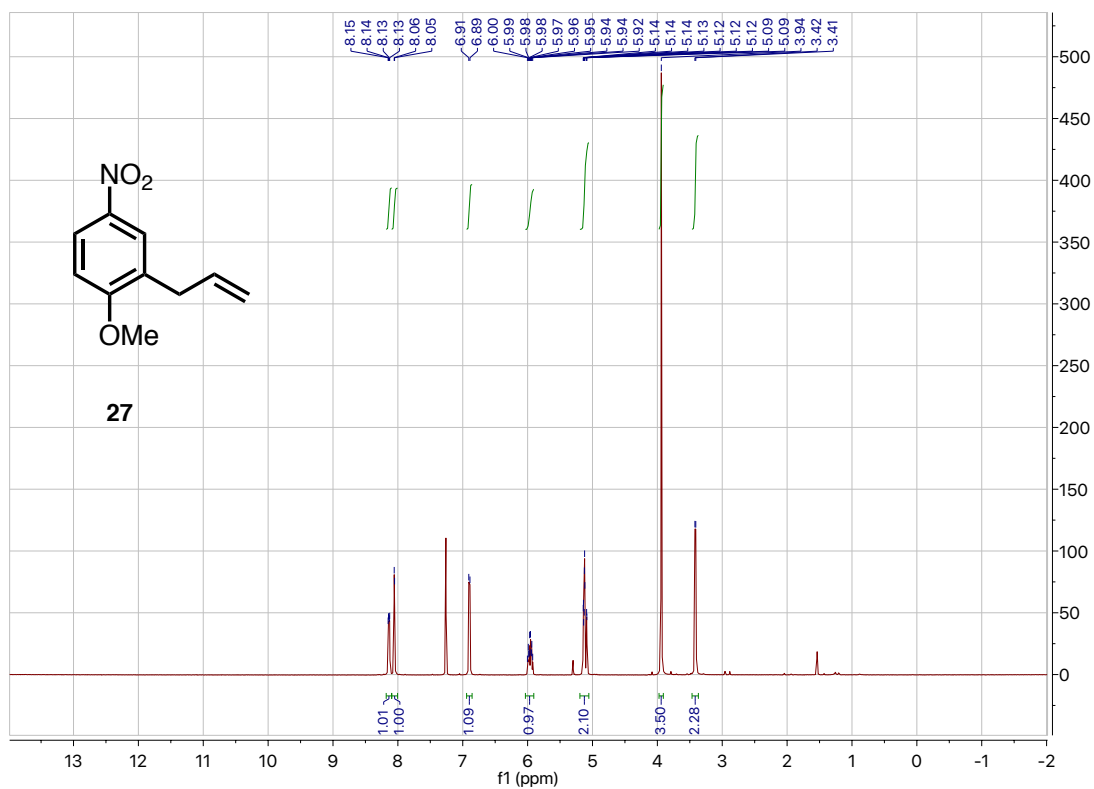

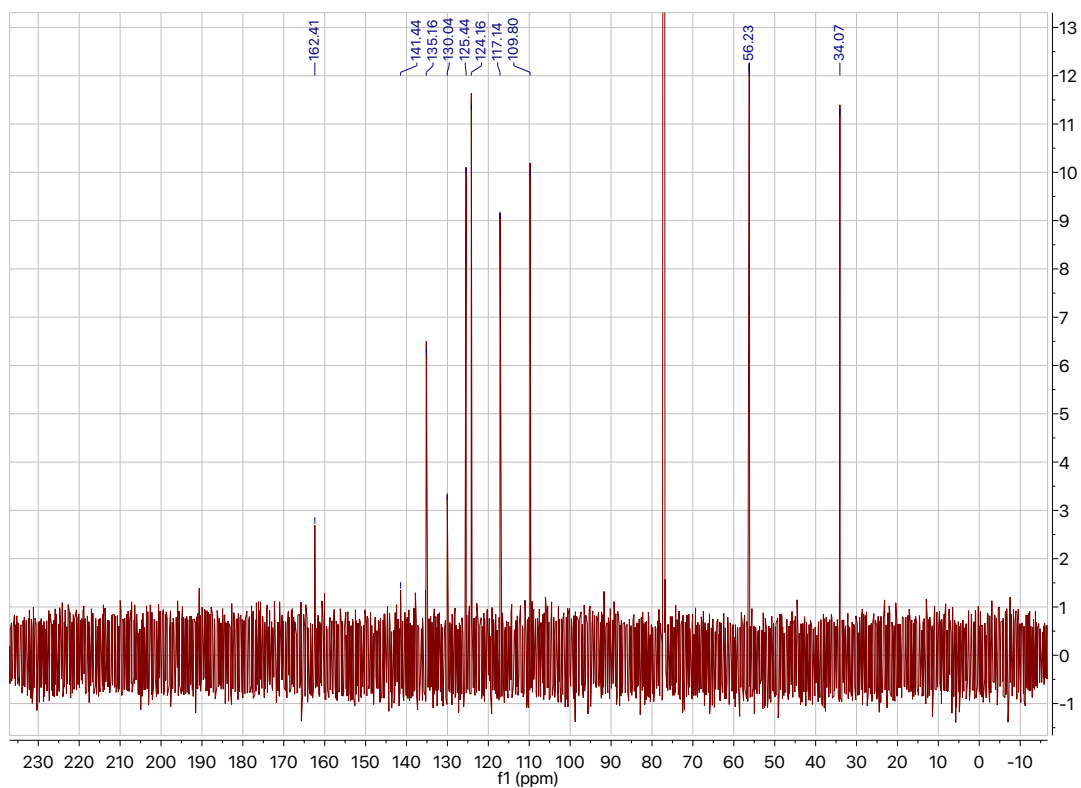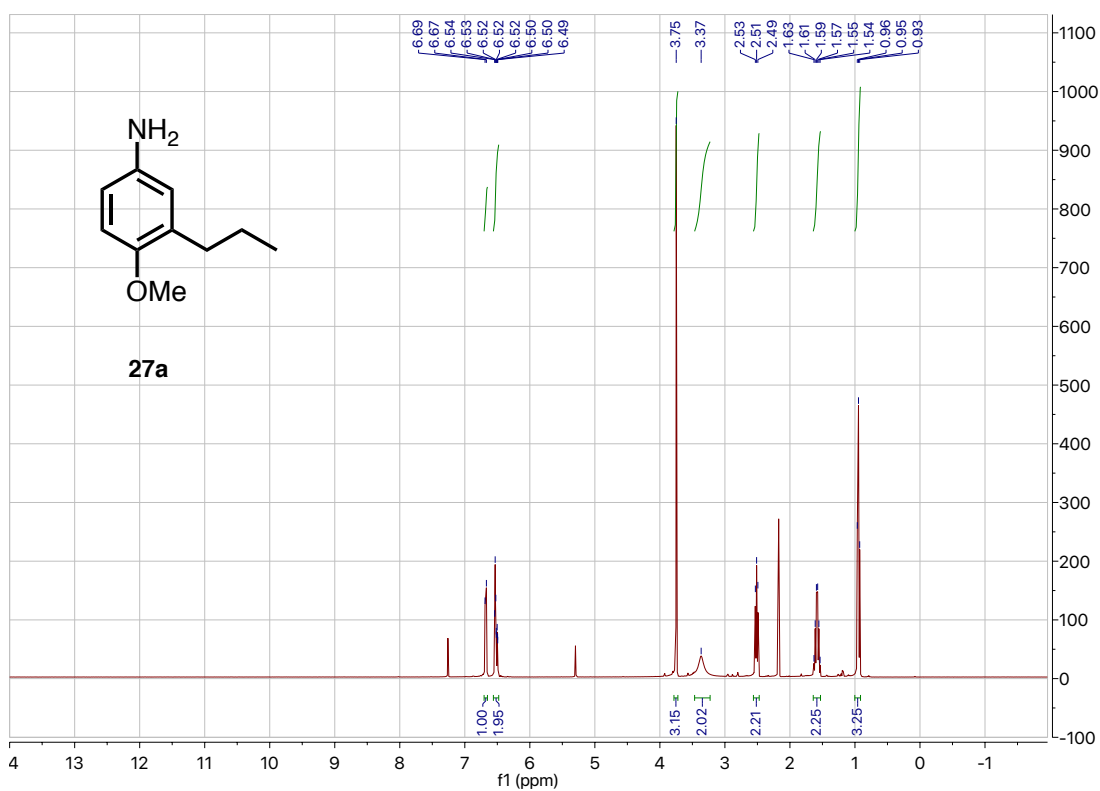

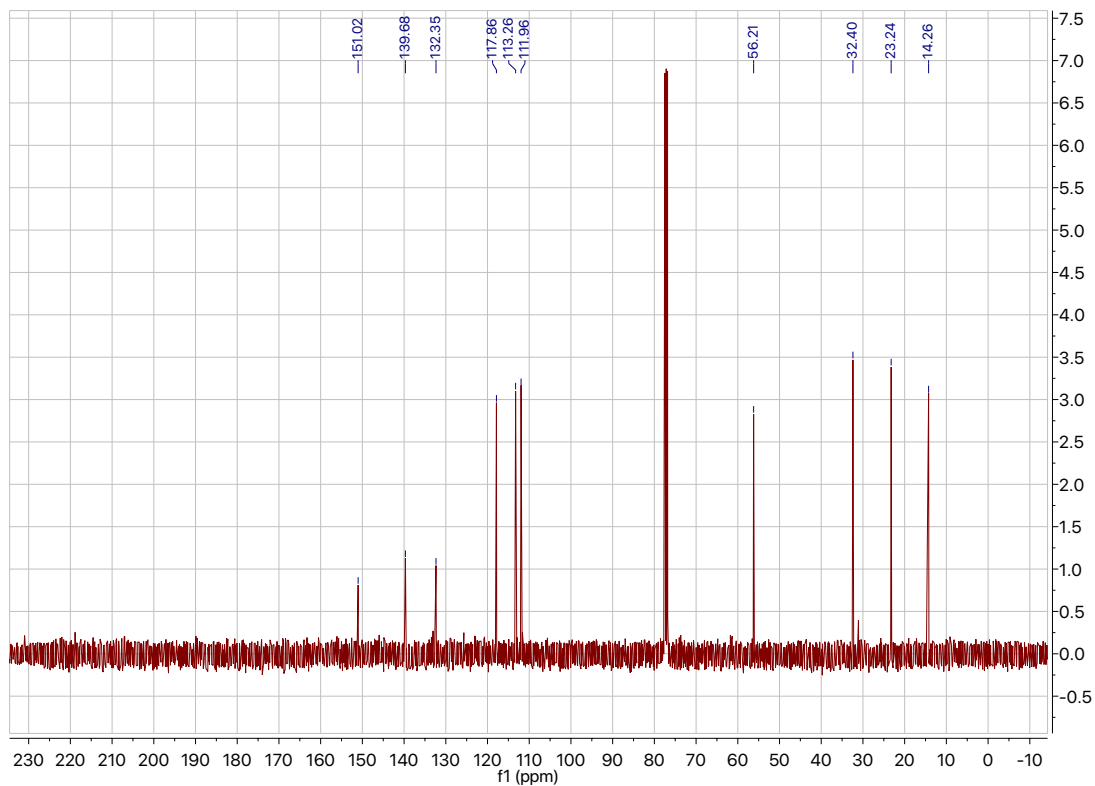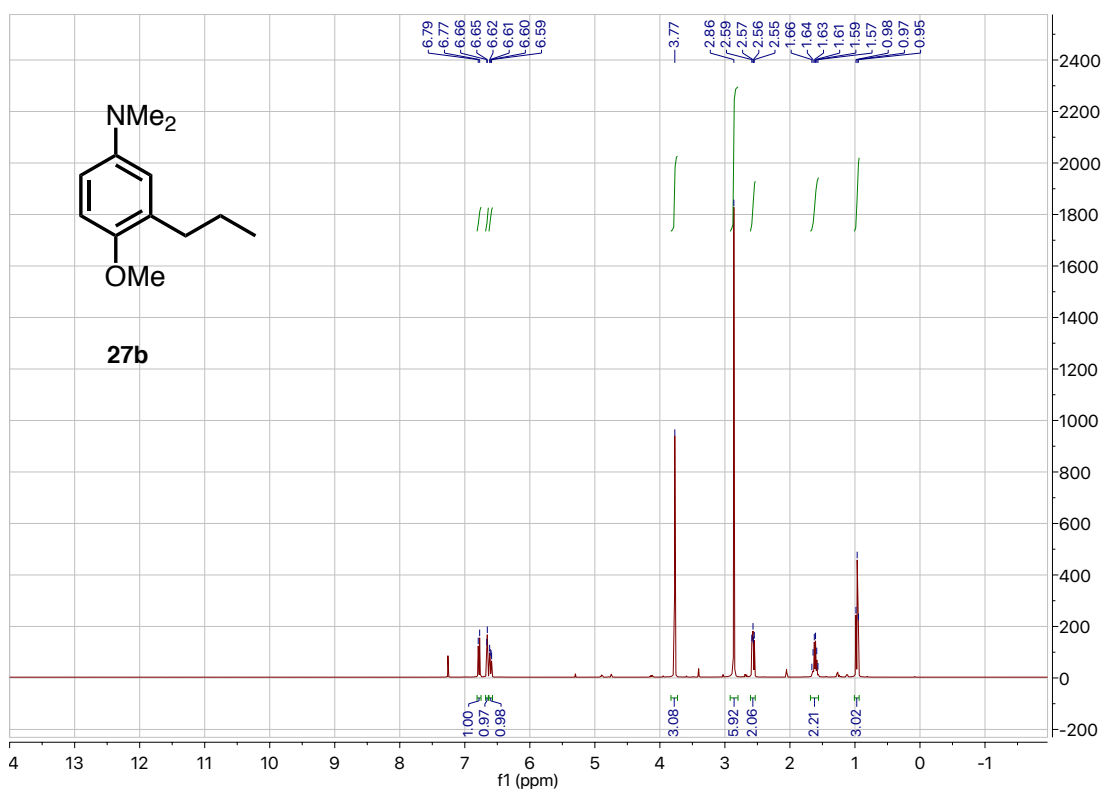



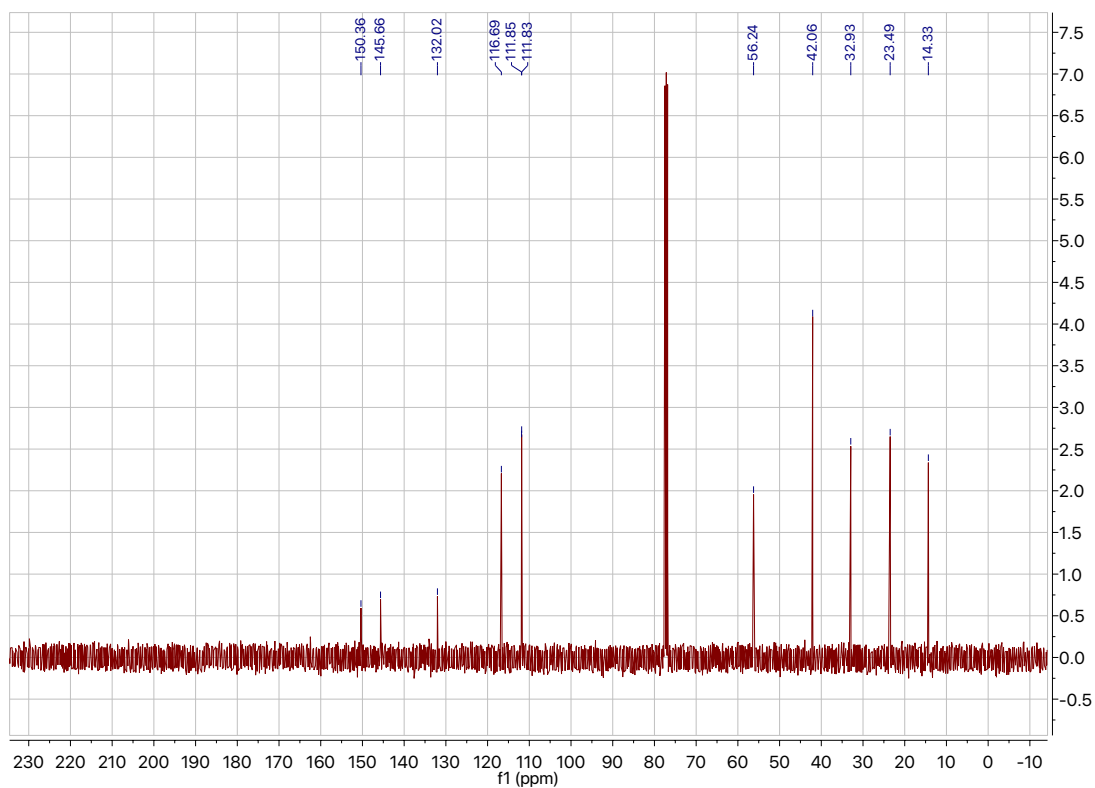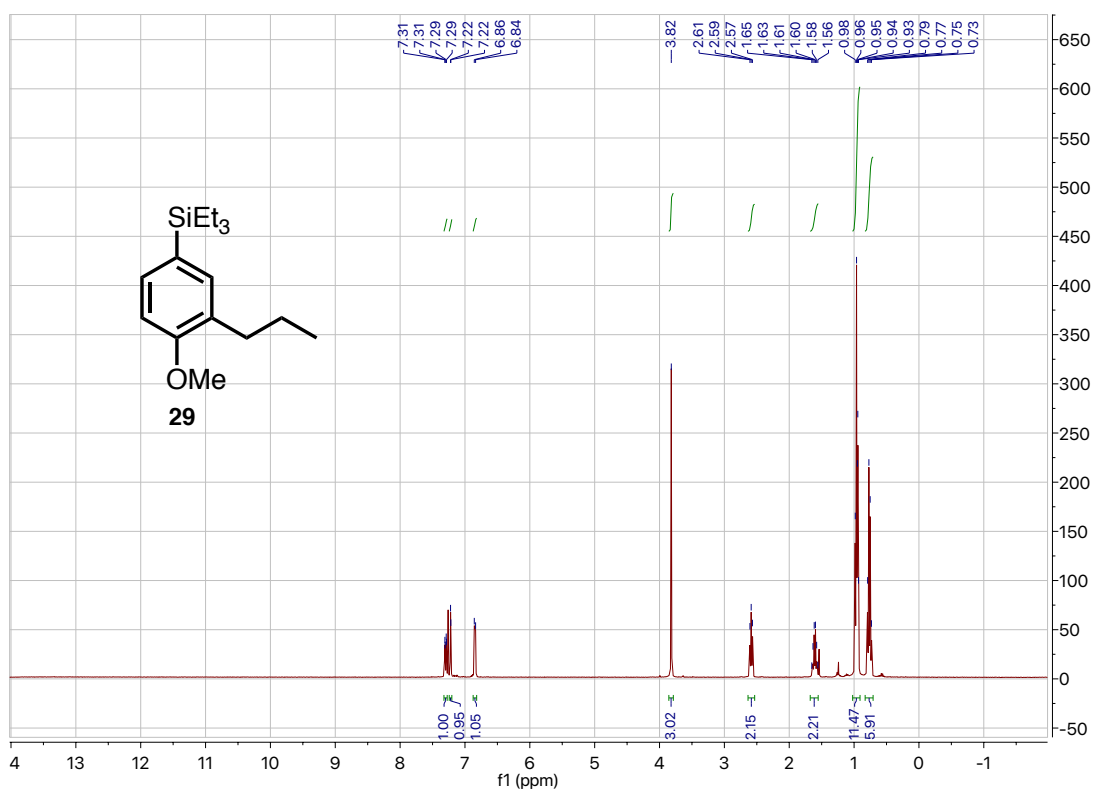

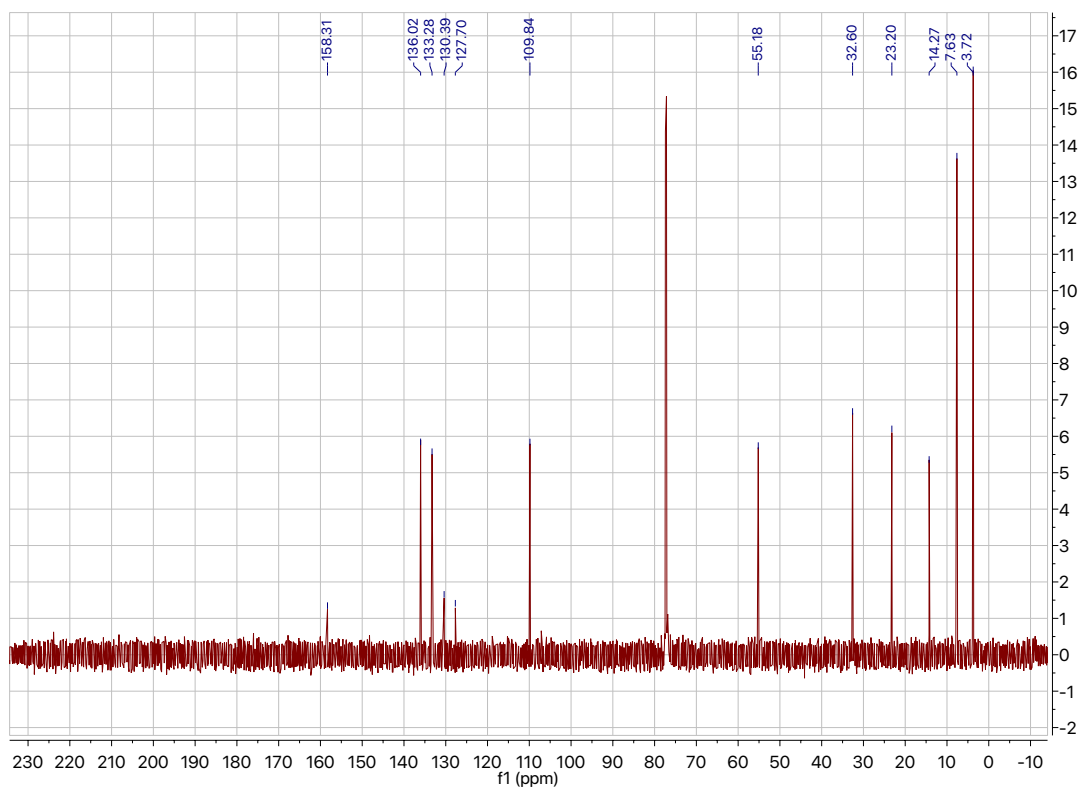

## XI) References

- [1] S. Meiries, K. Speck, D. B. Cordes, A. M. Z. Slawin and S. P. Nolan, *Organometallics* **2012**, *32*, 330-339.
- [2] X. Bantreil and S. P. Nolan, *Nature Protocols* **2010**, *6*, 69.
- [3] C. Liu, N. Han, X. Song and J. Qiu, *European Journal of Organic Chemistry* **2010**, *2010*, 5548-5551.
- [4] F. Camerel, G. Ulrich, J. Barbera and R. Ziessel, *Chemistry* **2007**, *13*, 2189-2200.
- [5] Z. Li, Z. Wu, W. Fu, P. Liu, B. Jiao, D. Wang, G. Zhou and X. Hou, *The Journal of Physical Chemistry C* **2012**, *116*, 20504-20512.
- [6] M. Selva, A. Perosa, P. Tundo and D. Brunelli, *The Journal of Organic Chemistry* **2006**, *71*, 5770-5773.
- [7] L. Huang, T. Niu, J. Wu and Y. Zhang, *J Org Chem* **2011**, *76*, 1759-1766.
- [8] T. Knauber, F. Arikian, G. V. Röschenhaler and J. Gooßen Lukas, *Chemistry – A European Journal* **2011**, *17*, 2689-2697.
- [9] J. A. Hodges and R. T. Raines, *Organic Letters* **2006**, *8*, 4695-4697.
- [10] E. Baciocchi, M. Bietti, M. F. Gerini and O. Lanzalunga, *The Journal of Organic Chemistry* **2005**, *70*, 5144-5149.
- [11] C. Wiles, P. Watts and S. J. Haswell, *Tetrahedron Letters* **2006**, *47*, 5261-5264.
- [12] R. Gerber, O. Blacque and C. M. Frech, *Dalton Transactions* **2011**, *40*, 8996-9003.
- [13] L. L. Hill, J. M. Smith, W. S. Brown, L. R. Moore, P. Guevera, E. S. Pair, J. Porter, J. Chou, C. J. Wolterman, R. Craciun, D. A. Dixon and K. H. Shaughnessy, *Tetrahedron* **2008**, *64*, 6920-6934.
- [14] L. Zhang, Y. Zhang, Y. Deng and F. Shi, *RSC Advances* **2015**, *5*, 14514-14521.
- [15] Wibren D. Oosterbaan, Paul C. M. van Gerven, Cornelis A. van Walree, M. Koeberg, Jacob J. Piet, Remco W. A. Havenith, Jan W. Zwikker, Leonardus W. Jenneskens and R. Gleiter, *European Journal of Organic Chemistry* **2003**, *2003*, 3117-3130.
- [16] S. Kim, C. H. Oh, J. S. Ko, K. H. Ahn and Y. J. Kim, *The Journal of Organic Chemistry* **1985**, *50*, 1927-1932.
- [17] E. M. Wiensch, D. P. Todd and J. Montgomery, *ACS Catalysis* **2017**, 5568-5571.
- [18] H. Guo, X. Chen, C. Zhao and W. He, *Chem Commun (Camb)* **2015**, *51*, 17410-17412.
- [19] L. Guo, A. Chatupheeraphat and M. Rueping, *Angew Chem Int Ed Engl* **2016**, *55*, 11810-11813.
- [20] C. Zarate and R. Martin, *J Am Chem Soc* **2014**, *136*, 2236-2239.
- [21] K.-s. Lee, D. Katsoulis and J. Choi, *ACS Catalysis* **2016**, *6*, 1493-1496.
- [22] C. C. a. J. F. Hartwig, *Science* **2014**, *343*, 853-857.
- [23] Y. Yamanoi and H. Nishihara, *The Journal of Organic Chemistry* **2008**, *73*, 6671-6678.
- [24] G. A. Olah, B. G. B. Gupta, S. C. Narang and R. Malhotra, *The Journal of Organic Chemistry* **1979**, *44*, 4272-4275.
- [25] W. B. Chen, C. H. Xing, J. Dong and Q. S. Hu, *Adv Synth Catal* **2016**, *358*, 2072-2076.
- [26] Y. Yoshida, S. Otsuka, K. Nogi and H. Yorimitsu, *Org Lett* **2018**, *20*, 1134-1137.
- [27] G. Pandey, D. Jadhav, S. K. Tiwari and B. Singh, *Advanced Synthesis & Catalysis* **2014**, *356*, 2813-2818.
- [28] R. Gujjar, F. El Mazouni, K. L. White, J. White, S. Creason, D. M. Shackleford, X. Deng, W. N. Charman, I. Bathurst, J. Burrows, D. M. Floyd, D. Matthews, F. S. Buckner, S. A. Charman, M. A. Phillips and P. K. Rathod, *J Med Chem* **2011**, *54*, 3935-3949.
- [29] A. Jabbari, M. Davoodnejad, M. Alimardani, A. Assadieskandar, A. Sadeghian, H. Safdari, J. Movaffagh and H. Sadeghian, *Bioorg Med Chem* **2012**, *20*, 5518-5526.
- [30] J. Schlosser, E. Johannes, M. Zindler, J. Lemmerhirt, B. Sommer, M. Schütt and C. Peifer, *Tetrahedron Letters* **2015**, *56*, 89-94.
